# Supplementary material
Source: publisher figshare collection journal article supplement (https://diabetesjournals.figshare.com/ndownloader/files/29052027)
Supplement: Supplementary file 1 [file 29052027]

## Sheet: SIDD
Table S4 SNPs associated with each of the clusters
SIDD
Unadjusted model								Adjusted model
Variable	Effect	Lower	Upper	P-value	I2	Heterogeneity	P-value (FDR)	Effect	Lower	Upper	P-value	P-value (FDR)	REF	ALT
rs917195	0.0478208	0.0209776	0.074664	0.000480041	0	0.901884	0.135867	0.0299352	-0.00830095	0.0681714	0.124916	0.797844	C	T
rs76811102	-0.0207208	-0.0326878	-0.00875373	0.00068968	0	0.750481	0.135867	-0.0226542	-0.0395954	-0.00571306	0.00876926	0.610135	C	T
rs703972	-0.0525742	-0.0860765	-0.0190719	0.0021	0	0.681688	0.230009	-0.0327501	-0.0805809	0.0150808	0.179596	0.797844	G	C
rs11257655	0.0419671	0.014152	0.0697823	0.00310482	0	0.456909	0.230009	0.0403414	0.000411319	0.0802715	0.0476863	0.783375	C	T
rs1042725	0.049381	0.0160493	0.0827127	0.0036879	0	0.333721	0.230009	0.0320386	-0.0156427	0.0797199	0.187851	0.797844	C	T
rs17819328	-0.0486186	-0.081772	-0.0154651	0.00405014	0	0.174883	0.230009	-0.0215678	-0.0798729	0.0367373	0.468442	0.96308	T	G
rs2233632	-0.0449878	-0.0757278	-0.0142478	0.00412557	0	0.165877	0.230009	-0.0361113	-0.0799417	0.00771909	0.106356	0.797844	C	T
rs10750397	-0.0443213	-0.0750282	-0.0136143	0.00467024	0	0.575065	0.230009	-0.0317078	-0.0755441	0.0121285	0.156282	0.797844	A	G
rs74452128	-0.0124127	-0.0212288	-0.00359668	0.00578774	0	0.714822	0.253374	-0.0110148	-0.0237047	0.00167514	0.0888983	0.797844	C	A
rs8017808	0.0386247	0.00951444	0.067735	0.00930717	0	0.224254	0.366702	0.0441622	0.00257108	0.0857533	0.0374225	0.783375	G	T
rs62370480	-0.035663	-0.0638823	-0.00744365	0.0132507	0	0.198844	0.436013	-0.0131228	-0.0533763	0.0271306	0.52285	0.987606	G	A
rs13085136	-0.0235389	-0.0421706	-0.00490723	0.0132796	0.167506	0.121148	0.436013	-0.0221177	-0.045708	0.00147253	0.0661183	0.797844	C	T
rs12140153	0.0224761	0.00395131	0.0410009	0.0174058	0	0.725904	0.492135	0.050826	0.00469014	0.0969619	0.0308337	0.783375	G	T
rs11820019	0.0117551	0.00201534	0.0214948	0.0180048	0	0.817822	0.492135	-0.00237006	-0.0250953	0.0203551	0.838034	0.991222	T	C
rs1412830	-0.038248	-0.0701378	-0.00635817	0.0187361	0	0.407803	0.492135	-0.0292269	-0.0919163	0.0334625	0.360838	0.924198	C	T
rs11967262	0.0401672	0.00625677	0.0740776	0.0202548	0	0.245312	0.494143	0.0345942	-0.0137815	0.0829699	0.161034	0.797844	C	G
rs474513	0.0390676	0.00559543	0.0725397	0.0221606	0	0.541913	0.494143	0.0296966	-0.0329496	0.0923429	0.35284	0.924198	A	G
rs9873618	0.0641525	0.00901818	0.119287	0.0225751	0.665235	0.0145155	0.494143	0.0640808	0.0101093	0.118052	0.0199609	0.67867	G	A
rs11759026	0.0331786	0.00419651	0.0621607	0.0248478	0	0.62988	0.496128	0.0412281	-0.000176553	0.0826327	0.0509849	0.783375	A	G
rs12811407	-0.0363502	-0.068572	-0.00412839	0.0270301	0	0.269726	0.496128	-0.0381107	-0.0841196	0.00789822	0.104482	0.797844	G	A
rs10954772	-0.0371979	-0.0702912	-0.00410463	0.0275904	0.0882801	0.13858	0.496128	-0.0386325	-0.0832858	0.0060208	0.0899439	0.797844	T	C
rs112498319	-0.0377088	-0.0712808	-0.00413678	0.0277026	0	0.198598	0.496128	-0.0226804	-0.0705837	0.025223	0.353425	0.924198	C	A
rs1421085	-0.0523893	-0.0997671	-0.00501141	0.0302135	0.470129	0.0520393	0.51757	-0.0817129	-0.129243	-0.0341832	0.00075288	0.289959	T	C
rs3811978	0.0271898	0.00218647	0.0521932	0.0330597	0	0.2685	0.538719	0.00495239	-0.0398983	0.0498031	0.828662	0.991222	A	G
rs10811660	-0.0253286	-0.0488804	-0.00177673	0.0350464	0	0.312826	0.538719	-0.034269	-0.0679474	-0.000590556	0.0461158	0.783375	G	A
rs11680058	-0.0191323	-0.0369716	-0.00129313	0.03555	0	0.32845	0.538719	-0.00489851	-0.0299885	0.0201915	0.701973	0.991222	G	A
rs6458354	-0.0374986	-0.073256	-0.0017411	0.0398405	0.253544	0.101659	0.577289	-0.0393323	-0.0822048	0.00354023	0.0721582	0.797844	C	T
rs8107974	0.0196098	0.00079952	0.0384201	0.0410256	0	0.700268	0.577289	0.0120475	-0.0151925	0.0392876	0.386031	0.924198	A	T
rs4932265	-0.0307465	-0.0605099	-0.000983159	0.0428975	0	0.301178	0.582698	-0.0306528	-0.0731142	0.0118086	0.157099	0.797844	T	C
rs7022807	0.0335162	0.000844072	0.0661883	0.0443678	0	0.370898	0.582698	0.0241249	-0.0225745	0.0708244	0.31129	0.916204	A	G
rs10406431	-0.0351665	-0.0710198	0.000686776	0.0545529	0.122418	0.131137	0.686596	-0.0332196	-0.0832634	0.0168243	0.193244	0.797844	A	G
rs1260326	0.0312532	-0.000869192	0.0633757	0.0565297	0	0.437009	0.686596	0.00156879	-0.0672693	0.0704069	0.964373	0.991222	T	C
rs4946812	-0.0308484	-0.0626797	0.00098297	0.0575068	0	0.70261	0.686596	-0.0332675	-0.078781	0.0122459	0.151969	0.797844	G	A
rs188247550	0.00629195	-0.000276642	0.0128605	0.0604608	0.148692	0.125337	0.700634	0.0054185	-0.00292652	0.0137635	0.203152	0.804717	C	T
rs10757283	0.0303387	-0.00276888	0.0634463	0.0724871	0	0.343933	0.764954	0.00965487	-0.0469386	0.0662483	0.7381	0.991222	C	T
rs11065299	-0.0161218	-0.0337313	0.00148765	0.0727515	0	0.335899	0.764954	-0.0129305	-0.0380003	0.0121393	0.31206	0.916204	G	A
rs7645517	0.0134265	-0.00124432	0.0280973	0.0728566	0	0.557646	0.764954	0.00539685	-0.030659	0.0414527	0.769241	0.991222	G	A
rs10974438	-0.0288005	-0.0603712	0.00277008	0.0737772	0	0.159601	0.764954	0.00515248	-0.0398558	0.0501608	0.822466	0.991222	A	C
rs4776970	0.0288068	-0.00368835	0.0613019	0.0822992	0	0.447237	0.817439	0.0325706	-0.013901	0.0790421	0.16954	0.797844	A	T
rs17013314	-0.00987344	-0.0210361	0.00128921	0.0829887	0	0.344805	0.817439	-0.0142252	-0.0305064	0.00205591	0.0868105	0.797844	A	G
rs243024	0.0290177	-0.00418287	0.0622182	0.0867066	0	0.176525	0.825907	-0.000587601	-0.0942145	0.0930393	0.990186	0.991222	G	A
rs96844	-0.0259093	-0.0558383	0.00401965	0.089748	0	0.525067	0.825907	-0.0431635	-0.0860355	-0.000291437	0.0484628	0.783375	G	A
rs13737	0.0291294	-0.00455999	0.0628188	0.0901371	0.26079	0.099997	0.825907	0.0412908	0.000655644	0.0819259	0.0464163	0.783375	G	T
rs2238689	0.0285921	-0.00525892	0.0624432	0.0978283	0	0.19022	0.835624	0.0510744	0.000758893	0.10139	0.0466432	0.783375	T	C
rs3798519	0.0214631	-0.0044262	0.0473523	0.104189	0	0.583413	0.835624	0.0280457	-0.00904066	0.0651321	0.138293	0.797844	A	C
rs17261179	-0.0277822	-0.0613695	0.00580509	0.104972	0	0.635661	0.835624	-0.0216579	-0.0696386	0.0263228	0.376317	0.924198	T	C
rs11699802	0.0277039	-0.0058628	0.0612706	0.105741	0	0.663233	0.835624	0.0264855	-0.0213637	0.0743348	0.277974	0.914533	C	T
rs523288	0.0341242	-0.00723814	0.0754866	0.105882	0.472802	0.0514476	0.835624	0.0157288	-0.0585261	0.0899837	0.678023	0.991222	A	T
rs17168486	0.0213894	-0.00457416	0.0473529	0.106383	0	0.502752	0.835624	0.0264737	-0.0108012	0.0637487	0.163916	0.797844	C	T
rs9537803	0.0251996	-0.00541656	0.0558158	0.106699	0	0.530205	0.835624	0.0298549	-0.0138044	0.0735141	0.180163	0.797844	C	T
rs1801212	0.0242355	-0.00545703	0.0539281	0.109653	0	0.190484	0.835624	0.0267363	-0.0158261	0.0692987	0.218254	0.846193	G	A
rs28638142	0.0112845	-0.00263573	0.0252048	0.112093	0	0.21165	0.835624	0.0089825	-0.0110136	0.0289786	0.37862	0.924198	C	A
rs1531583	0.0116078	-0.00272372	0.0259392	0.112406	0	0.196071	0.835624	-0.000971776	-0.0216389	0.0196954	0.926572	0.991222	G	T
rs738408	0.0383468	-0.0100591	0.0867527	0.120503	0.626974	0.0205854	0.850874	0.00557398	-0.0344095	0.0455575	0.784674	0.991222	C	T
rs7903146	0.0247492	-0.00656888	0.0560673	0.121414	0	0.401868	0.850874	0.0358036	-0.00896071	0.0805679	0.116968	0.797844	C	T
rs10228066	-0.0261908	-0.0594689	0.00708719	0.122939	0	0.267216	0.850874	0.000523434	-0.0470938	0.0481406	0.982811	0.991222	C	T
rs80147536	-0.0345835	-0.0785701	0.0094031	0.123322	0.799146	0.00160198	0.850874	0.000698085	-0.0667254	0.0681215	0.98381	0.991222	A	T
rs6708643	0.0313242	-0.00883554	0.0714838	0.126326	0.263868	0.0992903	0.850874	0.0739241	0.0260422	0.121806	0.00247848	0.337074	G	A
rs13262861	0.0185243	-0.00529331	0.0423419	0.127415	0	0.188023	0.850874	0.0226046	-0.0111898	0.056399	0.18986	0.797844	C	A
rs2052261	-0.0235973	-0.054151	0.00695649	0.130097	0	0.473209	0.853759	-0.0363416	-0.0800349	0.0073517	0.103062	0.797844	G	A
rs10848958	-0.0175822	-0.0404712	0.00530667	0.132181	0	0.482695	0.853759	-0.0100101	-0.0421122	0.022092	0.541097	0.991222	C	T
rs505922	0.0231677	-0.00837002	0.0547054	0.149925	0	0.323407	0.952134	-0.00654391	-0.0518274	0.0387396	0.776997	0.991222	T	C
rs12910825	0.0268863	-0.00992178	0.0636944	0.152245	0.22119	0.109044	0.952134	0.034884	-0.0105531	0.0803211	0.132389	0.797844	A	G
rs4686471	0.0305675	-0.0117787	0.0729137	0.157128	0.369836	0.0748292	0.957516	0.0240377	-0.0220592	0.0701346	0.30676	0.916204	T	C
rs291367	-0.0230938	-0.0552475	0.00905997	0.159219	0	0.743633	0.957516	-0.0269123	-0.072739	0.0189143	0.249725	0.889873	G	A
rs11137820	0.0233019	-0.00945853	0.0560623	0.163291	0	0.335104	0.957516	0.040855	-0.00588225	0.0875922	0.0866597	0.797844	C	G
rs74653713	-0.00879161	-0.0211965	0.00361323	0.16481	0	0.596159	0.957516	-0.00269172	-0.0205325	0.0151491	0.767453	0.991222	C	A
rs10937721	0.0227982	-0.00940375	0.0550002	0.165256	0	0.756274	0.957516	0.0260222	-0.0199201	0.0719645	0.266937	0.914533	G	C
rs5758223	0.0207669	-0.00907268	0.0506066	0.172555	0	0.188053	0.976986	0.0531023	-0.0218677	0.128072	0.165055	0.797844	G	A
rs187936726	0.00654937	-0.00291951	0.0160183	0.175209	0	0.230682	0.976986	0.0068061	-0.0126709	0.0262831	0.493409	0.970833	A	G
rs1317617	0.0186971	-0.00851096	0.0459051	0.178023	0	0.191633	0.976986	-0.00291833	-0.0727717	0.066935	0.934739	0.991222	G	A
rs7124681	-0.0392452	-0.0967724	0.0182819	0.181192	0.641877	0.0181182	0.976986	-0.0232405	-0.118965	0.0724843	0.634182	0.991222	C	A
rs2189301	-0.0147594	-0.0366222	0.00710338	0.185783	0	0.47652	0.976986	-0.014839	-0.0458494	0.0161713	0.348307	0.924198	G	A
rs11657492	0.0127877	-0.00634534	0.0319208	0.190211	0	0.62562	0.976986	0.02731	0.000417503	0.0542025	0.0465477	0.783375	T	G
rs2456530	0.0149692	-0.00744271	0.0373812	0.190505	0	0.20841	0.976986	0.0203481	-0.0239403	0.0646365	0.367857	0.924198	C	T
rs8010382	0.0222866	-0.0112695	0.0558427	0.193009	0	0.812541	0.976986	0.025272	-0.0223963	0.0729403	0.298758	0.916204	A	G
rs528122639	0.000737741	-0.000392898	0.00186838	0.200941	0	0.181167	0.976986	0.000841255	-0.00106129	0.0027438	0.386137	0.924198	G	A
rs10962	0.0160656	-0.00876806	0.0408992	0.204814	0	0.23612	0.976986	0.0124026	-0.0226897	0.0474949	0.488493	0.970833	G	C
rs2465043	0.0207362	-0.0113307	0.052803	0.205005	0	0.311003	0.976986	0.0300196	-0.0157097	0.0757488	0.198218	0.801293	G	A
rs4810426	0.0134977	-0.00744454	0.03444	0.206503	0	0.536154	0.976986	0.0480855	0.0104853	0.0856857	0.0121923	0.67867	C	T
rs78403475	-0.0125572	-0.0323495	0.007235	0.213682	0	0.168159	0.976986	0.00215191	-0.0260513	0.0303552	0.881123	0.991222	G	C
rs2249105	0.0202062	-0.0118237	0.0522361	0.216291	0	0.193997	0.976986	0.0378774	-0.00795184	0.0837067	0.105256	0.797844	A	G
rs10469140	-0.0207147	-0.0540826	0.0126532	0.223703	0	0.414158	0.976986	-0.0327352	-0.0803037	0.0148333	0.177405	0.797844	A	G
rs35895680	0.0193997	-0.0118778	0.0506773	0.224116	0	0.803898	0.976986	0.0290225	-0.0155581	0.073603	0.20197	0.804717	C	A
rs7867635	0.0270466	-0.0166801	0.0707733	0.225393	0.40489	0.0667687	0.976986	0.0389073	-0.00719618	0.0850108	0.0981198	0.797844	T	C
rs234853	0.0180596	-0.0111403	0.0472594	0.225436	0	0.297404	0.976986	0.0554298	0.0138545	0.0970052	0.00897257	0.610135	G	A
rs528350911	0.00318786	-0.0019904	0.00836613	0.227586	0	0.226313	0.976986	0.00136479	-0.00801782	0.0107474	0.775571	0.991222	C	G
rs616279	-0.018053	-0.0475626	0.0114566	0.230512	0	0.301758	0.976986	-0.0257171	-0.0677081	0.0162738	0.229996	0.864427	G	A
rs12454712	-0.0172676	-0.045716	0.0111807	0.234179	0	0.318636	0.976986	-0.0120657	-0.0520668	0.0279354	0.554392	0.991222	T	C
rs10842994	-0.0158236	-0.0418943	0.010247	0.234203	0	0.331274	0.976986	-0.00925711	-0.0465624	0.0280481	0.626715	0.991222	C	T
rs348330	-0.0185549	-0.04966	0.0125502	0.242338	0	0.497632	0.976986	-0.039414	-0.0855414	0.00671342	0.0939913	0.797844	G	A
rs11496066	0.0151087	-0.0102695	0.0404869	0.243271	0	0.64521	0.976986	0.0161544	-0.0201028	0.0524117	0.38252	0.924198	T	C
rs2872246	0.0200221	-0.0136429	0.053687	0.243744	0	0.477299	0.976986	0.0571226	0.00907192	0.105173	0.019806	0.67867	A	C
rs1112718	-0.0192621	-0.0517592	0.013235	0.245344	0	0.21479	0.976986	-0.00175537	-0.0524333	0.0489225	0.945874	0.991222	A	G
rs66477705	0.00629803	-0.00436634	0.0169624	0.247072	0	0.162362	0.976986	-0.00789628	-0.0362393	0.0204467	0.585038	0.991222	T	C
rs34965774	0.0137969	-0.00958331	0.0371771	0.247438	0	0.554565	0.976986	0.0249923	-0.00849553	0.0584802	0.143538	0.797844	G	A
rs17122772	-0.0160391	-0.0433194	0.0112413	0.249186	0	0.616896	0.976986	-0.0126571	-0.0512927	0.0259784	0.520814	0.987606	C	G
rs1412234	0.0182626	-0.0128977	0.0494229	0.250677	0	0.560966	0.976986	-0.00558699	-0.0499201	0.0387461	0.804908	0.991222	T	C
rs78840640	-0.00558018	-0.0152288	0.00406843	0.256993	0	0.23942	0.976986	0.000890707	-0.0174916	0.0192731	0.924339	0.991222	C	G
rs7629630	-0.0136948	-0.0376102	0.0102206	0.261716	0	0.746225	0.976986	-0.0254587	-0.0597024	0.00878489	0.145074	0.797844	A	T
rs140242150	0.00173643	-0.00130907	0.00478193	0.263782	0.0501942	0.146752	0.976986	0.00168394	-0.0023516	0.00571949	0.413443	0.941696	G	A
rs539515	-0.0154054	-0.0424658	0.0116551	0.264509	0	0.192947	0.976986	-0.0233387	-0.0620676	0.0153902	0.23756	0.873193	A	C
rs10830963	-0.0171949	-0.0474358	0.0130459	0.265093	0	0.655164	0.976986	0.0616495	0.0184345	0.104865	0.00517332	0.527679	C	G
rs7178762	-0.0190591	-0.0528367	0.0147186	0.268765	0.0051131	0.156237	0.976986	-0.0385214	-0.10479	0.0277477	0.254577	0.895409	C	T
rs10882101	-0.0183842	-0.051019	0.0142506	0.269546	0	0.313411	0.976986	-0.000907521	-0.0476867	0.0458716	0.969669	0.991222	T	C
rs510807	0.0269223	-0.0209107	0.0747553	0.269963	0.472443	0.051527	0.976986	0.0226694	-0.0260738	0.0714126	0.362012	0.924198	C	A
rs28525376	0.0185175	-0.0143945	0.0514296	0.270136	0	0.386202	0.976986	0.0127405	-0.0341815	0.0596625	0.594601	0.991222	G	T
rs6070625	0.0215296	-0.0168082	0.0598675	0.27104	0.199874	0.113875	0.976986	-0.00450478	-0.0524226	0.043413	0.853812	0.991222	C	G
rs62271373	0.0166225	-0.0130671	0.0463121	0.272494	0.732897	0.00621201	0.976986	0.0234437	0.00319222	0.0436951	0.0232737	0.730436	T	A
rs4925109	-0.0277333	-0.077516	0.0220494	0.27489	0.573185	0.0304117	0.976986	-0.00354805	-0.073333	0.0662369	0.920622	0.991222	A	G
rs569511541	-2.99094e-05	-8.36377e-05	2.38189e-05	0.275242	0	0.457518	0.976986	-5.3534e-05	-0.000129464	2.23965e-05	0.167017	0.797844	A	G
rs6885132	-0.0105909	-0.0298234	0.00864167	0.280453	0	0.696141	0.986593	-0.0213597	-0.0486373	0.00591781	0.124844	0.797844	C	G
rs7719891	-0.0163025	-0.0461503	0.0135452	0.284389	0	0.245888	0.988005	-0.00616825	-0.0488906	0.0365541	0.777193	0.991222	A	G
rs57327348	0.0171334	-0.0145505	0.0488173	0.289204	0.215606	0.110312	0.988005	0.0273845	-0.011334	0.066103	0.165677	0.797844	A	T
rs576674	-0.0146671	-0.041842	0.0125077	0.290122	0.128845	0.129724	0.988005	-0.0320582	-0.0679089	0.00379242	0.0796653	0.797844	G	A
rs2272163	-0.0204609	-0.0585798	0.0176581	0.292782	0.214791	0.110497	0.988005	-0.0420955	-0.103163	0.0189717	0.176675	0.797844	C	A
rs429358	0.0118018	-0.010213	0.0338166	0.293392	0	0.67103	0.988005	0.0167457	-0.0230291	0.0565205	0.409276	0.940929	T	C
rs79687284	0.00683947	-0.0060378	0.0197167	0.29788	0.282803	0.094935	0.98912	0.00166799	-0.0168382	0.0201742	0.85978	0.991222	G	C
rs2642588	0.0162935	-0.0147043	0.0472912	0.302904	0	0.534139	0.98912	0.0427889	-0.00142547	0.0870033	0.0578577	0.797844	T	G
rs71372253	-0.0107314	-0.0312614	0.00979863	0.305596	0.441566	0.0584284	0.98912	-0.0330074	-0.0532857	-0.0127291	0.00142137	0.289959	T	C
rs2800733	-0.0228818	-0.0669103	0.0211466	0.308391	0.501828	0.0451059	0.98912	-0.03474	-0.0770919	0.007612	0.107902	0.797844	A	G
rs79103584	0.00373148	-0.00345204	0.010915	0.308629	0	0.820146	0.98912	0.00538233	-0.00496598	0.0157306	0.308008	0.916204	T	A
rs231349	0.00922527	-0.0085402	0.0269907	0.308786	0	0.386029	0.98912	0.0167248	-0.00841263	0.0418623	0.192222	0.797844	C	T
rs67254669	-0.00127378	-0.00377665	0.00122908	0.31853	0	0.215122	0.98998	-0.00149369	-0.00505085	0.00206348	0.410503	0.940929	A	G
rs1562396	0.0278583	-0.0272978	0.0830144	0.322204	0.667297	0.014214	0.98998	0.0422536	-0.0115087	0.0960159	0.123463	0.797844	A	G
rs9430095	-0.0167614	-0.0501695	0.0166467	0.325436	0	0.369049	0.98998	0.00818322	-0.0435557	0.0599221	0.756564	0.991222	C	G
rs4930091	-0.0141244	-0.0427844	0.0145356	0.334085	0	0.616121	0.98998	-0.0210756	-0.062035	0.0198837	0.313214	0.916204	T	C
rs75253922	-0.0127914	-0.0392144	0.0136316	0.34271	0	0.209879	0.98998	-0.000496071	-0.0530305	0.0520384	0.985234	0.991222	T	C
rs9569864	0.0180645	-0.0194218	0.0555508	0.344914	0.479629	0.0499419	0.98998	0.020703	-0.0355476	0.0769537	0.470685	0.96308	C	T
rs11642430	0.0197261	-0.0214857	0.0609379	0.348173	0.320565	0.0862172	0.98998	0.0249557	-0.0490795	0.0989909	0.508829	0.979256	C	G
rs7222481	-0.0218702	-0.0678694	0.024129	0.351409	0.490663	0.0475258	0.98998	-0.0139396	-0.0816242	0.0537449	0.686466	0.991222	G	C
rs11786992	-0.023862	-0.0744812	0.0267572	0.355522	0.571935	0.0306548	0.98998	-0.0353913	-0.0993853	0.0286027	0.278391	0.914533	A	C
rs2982521	-0.0154626	-0.0483134	0.0173882	0.356247	0	0.416932	0.98998	-0.0014611	-0.0483597	0.0454375	0.95131	0.991222	A	T
rs1426371	-0.0251082	-0.0786678	0.0284515	0.358195	0.688361	0.011299	0.98998	-0.0206938	-0.0913861	0.0499986	0.566143	0.991222	G	A
rs2258238	0.0106909	-0.0121362	0.0335181	0.358654	0.146749	0.125768	0.98998	0.00937199	-0.0200883	0.0388322	0.532949	0.991222	A	T
rs7249758	-0.012617	-0.0396826	0.0144486	0.360895	0	0.828891	0.98998	0.00137333	-0.0372498	0.0399965	0.94444	0.991222	G	A
rs560716466	0.00215644	-0.00250144	0.00681432	0.364197	0.72196	0.007318	0.98998	0.00181572	-0.00133574	0.00496719	0.258798	0.902476	G	A
rs62492368	0.0244268	-0.028343	0.0771967	0.364272	0.61543	0.0225788	0.98998	0.0303348	-0.0612407	0.12191	0.516179	0.987606	G	A
rs76011118	0.0048977	-0.00573836	0.0155338	0.366778	0	0.486324	0.98998	-0.00705111	-0.0221241	0.00802183	0.359211	0.924198	G	A
rs4771648	-0.0144185	-0.0459724	0.0171354	0.370465	0	0.264532	0.98998	-0.0224142	-0.0674333	0.0226049	0.329148	0.924198	G	A
rs7987740	-0.03003	-0.0965615	0.0365015	0.37634	0.734374	0.00607003	0.98998	-0.0242628	-0.0776984	0.0291728	0.373501	0.924198	T	C
rs2283164	-0.00617957	-0.0198717	0.00751251	0.376383	0	0.647221	0.98998	-0.00928048	-0.0287372	0.0101763	0.349858	0.924198	A	G
rs2820446	-0.0254825	-0.0820809	0.0311158	0.377537	0.678085	0.0126829	0.98998	-0.0813487	-0.189368	0.0266706	0.139934	0.797844	C	G
rs8032939	-0.0195304	-0.0633041	0.0242432	0.38186	0.507685	0.0438471	0.98998	-0.0249022	-0.0879456	0.0381412	0.43882	0.96308	T	C
rs17689007	-0.0148283	-0.0480707	0.0184141	0.38197	0	0.856994	0.98998	-0.0137405	-0.0612002	0.0337192	0.570409	0.991222	G	A
rs4457053	-0.013577	-0.0440521	0.016898	0.38256	0	0.45112	0.98998	0.00452777	-0.0387316	0.0477871	0.837462	0.991222	G	A
rs56348580	0.0135868	-0.0171435	0.0443171	0.386184	0	0.235459	0.98998	-0.0115953	-0.0553989	0.0322082	0.603882	0.991222	G	C
rs11696357	-0.00761635	-0.0248465	0.00961375	0.386283	0.33112	0.0837763	0.98998	0.0026165	-0.0166994	0.0219324	0.790629	0.991222	A	G
rs17522122	-0.014444	-0.0473917	0.0185038	0.390215	0	0.220217	0.98998	-0.0313247	-0.0784446	0.0157953	0.19259	0.797844	G	T
rs1641523	-0.017013	-0.0558974	0.0218713	0.391146	0.228296	0.107427	0.98998	-0.00327379	-0.0590989	0.0525513	0.908493	0.991222	C	T
rs8037894	-0.0245858	-0.0808831	0.0317115	0.392029	0.617415	0.0222313	0.98998	-0.0405645	-0.0878819	0.00675291	0.0929092	0.797844	G	C
rs329122	0.0145108	-0.0189706	0.0479922	0.395633	0.0218672	0.152736	0.98998	0.0324967	-0.0255125	0.0905058	0.272217	0.914533	G	A
rs7978610	0.0135564	-0.0178243	0.044937	0.397163	0	0.4009	0.98998	0.0227316	-0.0220092	0.0674724	0.319344	0.920439	G	C
rs184509201	0.00565953	-0.00753071	0.0188498	0.40037	0.588627	0.0274581	0.98998	0.00650994	-0.00426775	0.0172876	0.236469	0.873193	C	G
rs10305745	-0.0015993	-0.00533686	0.00213827	0.401658	0	0.28951	0.98998	0.00108689	-0.00445356	0.00662734	0.700612	0.991222	G	A
rs12578639	-0.0108841	-0.036398	0.0146298	0.403092	0	0.284416	0.98998	-0.00922915	-0.045611	0.0271527	0.619053	0.991222	A	T
rs76895963	-0.00529906	-0.0177427	0.00714455	0.403919	0.651762	0.0165526	0.98998	0.00356741	-0.0102413	0.0173761	0.612612	0.991222	T	G
rs58432198	0.0147484	-0.0201051	0.0496018	0.406898	0.615175	0.0226237	0.98998	-0.0303292	-0.0600431	-0.000615306	0.0454409	0.783375	C	T
rs9379084	0.0082207	-0.0113072	0.0277486	0.409319	0	0.533064	0.98998	-0.00618454	-0.033726	0.0213569	0.659851	0.991222	G	A
rs11063028	0.0182314	-0.0251743	0.0616371	0.410377	0.607494	0.0239885	0.98998	-0.00258734	-0.0605682	0.0553935	0.930305	0.991222	T	C
rs2972144	0.0132085	-0.0183506	0.0447675	0.412042	0	0.360245	0.98998	0.00630286	-0.0389654	0.0515711	0.784935	0.991222	A	G
rs61850200	0.0157974	-0.0222761	0.0538708	0.416089	0.339996	0.0817236	0.98998	0.0483415	-0.0393961	0.136079	0.280188	0.914533	G	C
rs702634	0.0269353	-0.0382295	0.0921002	0.417863	0.759951	0.00389609	0.98998	0.0118849	-0.0765364	0.100306	0.79221	0.991222	G	A
rs549498088	0.000742819	-0.00107576	0.0025614	0.423382	0	0.422615	0.98998	0.000176646	-0.00257995	0.00293324	0.900051	0.991222	C	T
rs113414093	0.0063836	-0.00948763	0.0222548	0.430509	0.434811	0.0599547	0.98998	0.00978371	-0.0069055	0.0264729	0.25056	0.889873	G	A
rs2280141	-0.0134527	-0.046991	0.0200857	0.431769	0	0.211492	0.98998	0.0147013	-0.0331206	0.0625231	0.546824	0.991222	T	G
rs12719778	-0.0212065	-0.0748477	0.0324347	0.438428	0.578526	0.0293792	0.98998	-0.0122574	-0.0911979	0.0666831	0.760875	0.991222	T	C
rs4929965	-0.0132298	-0.0468086	0.0203491	0.439991	0	0.717139	0.98998	0.00398419	-0.0436516	0.05162	0.869787	0.991222	A	G
rs7847880	0.00944314	-0.0145642	0.0334505	0.440743	0	0.329453	0.98998	-0.000269772	-0.034674	0.0341345	0.987738	0.991222	T	C
rs10096633	-0.010488	-0.0372581	0.016282	0.442558	0.293012	0.0925816	0.98998	-0.019044	-0.0502019	0.0121139	0.230938	0.864427	C	T
rs2581787	0.013114	-0.0204549	0.0466828	0.443869	0	0.508497	0.98998	0.00470406	-0.043207	0.0526151	0.847401	0.991222	G	T
rs2767036	-0.0119979	-0.0430336	0.0190378	0.448636	0	0.259223	0.98998	-0.0439809	-0.0883006	0.00033886	0.0517776	0.783375	C	A
rs1493694	0.00820936	-0.013255	0.0296737	0.453485	0.0550219	0.145724	0.98998	0.00636576	-0.0230609	0.0357925	0.671572	0.991222	C	T
rs13426680	-0.00640149	-0.0231614	0.0103584	0.45409	0	0.449862	0.98998	-0.0050454	-0.0335999	0.023509	0.729107	0.991222	A	G
rs10938398	0.0193428	-0.0315698	0.0702554	0.456494	0.54227	0.0365902	0.98998	-0.00344669	-0.0538023	0.0469089	0.893281	0.991222	G	A
rs9505097	-0.0100777	-0.0369	0.0167446	0.461488	0	0.692537	0.98998	-0.020292	-0.0586829	0.018099	0.30022	0.916204	C	T
rs1903002	0.012552	-0.0208862	0.0459903	0.461895	0	0.765328	0.98998	-0.0102687	-0.0579423	0.037405	0.672903	0.991222	C	G
rs1377807	0.0115667	-0.0193578	0.0424911	0.463507	0	0.311229	0.98998	-0.000454866	-0.0446305	0.0437208	0.983899	0.991222	G	C
rs199795270	-0.00158063	-0.00586853	0.00270727	0.469991	0	0.248685	0.98998	-0.00278474	-0.0104157	0.00484621	0.474458	0.96308	G	C
rs58730668	-0.00878287	-0.0328855	0.0153198	0.475103	0.0972285	0.13664	0.98998	-0.00926212	-0.0532181	0.0346938	0.679613	0.991222	T	C
rs9957145	-0.00892449	-0.0334228	0.0155738	0.475229	0	0.255485	0.98998	0.00273423	-0.0321404	0.0376088	0.877874	0.991222	G	A
rs9860730	0.0146844	-0.0260821	0.0554509	0.480192	0.386308	0.0710341	0.98998	0.0409547	-0.00333929	0.0852488	0.0699547	0.797844	A	G
rs1800574	0.00412618	-0.00735159	0.0156039	0.481063	0	0.489913	0.98998	0.002818	-0.0241358	0.0297718	0.837641	0.991222	C	T
rs557027608	0.000693821	-0.00126722	0.00265486	0.488034	0.767812	0.00333641	0.98998	4.57098e-05	-0.0011016	0.00119302	0.937759	0.991222	G	A
rs2431115	-0.011488	-0.0440039	0.021028	0.488648	0	0.643936	0.98998	-0.0141634	-0.0685855	0.0402587	0.609993	0.991222	A	G
rs28719468	0.00855419	-0.0157129	0.0328213	0.489634	0	0.293527	0.98998	0.00401999	-0.0305257	0.0385657	0.819587	0.991222	T	C
rs4709746	-0.00790704	-0.0303565	0.0145424	0.489988	0	0.478271	0.98998	-0.0072468	-0.0392013	0.0247077	0.656688	0.991222	C	T
rs146886108	0.00172436	-0.00317451	0.00662323	0.490263	0.372405	0.0742367	0.98998	0.00336797	-0.00265938	0.00939532	0.273433	0.914533	C	T
rs571342427	0.00111667	-0.00206426	0.00429761	0.491421	0.70204	0.00957497	0.98998	0.00181528	-0.000714498	0.00434506	0.159605	0.797844	T	C
rs4279506	0.0120904	-0.0224392	0.0466199	0.492541	0.0964473	0.136809	0.98998	0.0179899	-0.0282037	0.0641834	0.445285	0.96308	G	C
rs12001437	-0.0130915	-0.0507203	0.0245373	0.495306	0.20929	0.111745	0.98998	-0.0142916	-0.0709644	0.0423812	0.621123	0.991222	T	C
rs12236906	-0.00394496	-0.0154734	0.00758346	0.502419	0.625172	0.020892	0.98998	-0.000204339	-0.0188876	0.0184789	0.982898	0.991222	T	C
rs6600191	-0.0127838	-0.0508809	0.0253132	0.510741	0.517596	0.0417355	0.98998	-0.00415557	-0.0536132	0.0453021	0.869195	0.991222	T	C
rs1796330	-0.0120421	-0.0486696	0.0245854	0.519329	0.143677	0.126449	0.98998	0.000455235	-0.0471176	0.0480281	0.985036	0.991222	G	C
rs62357230	-0.00379404	-0.0154967	0.00790858	0.525149	0	0.326772	0.98998	-0.00161309	-0.018418	0.0151918	0.85077	0.991222	G	A
rs1801645	-0.0144654	-0.0592466	0.0303158	0.526658	0.483367	0.0491207	0.98998	-0.0332439	-0.0769721	0.0104844	0.136214	0.797844	C	T
rs2268382	0.0102089	-0.0215267	0.0419446	0.528372	0	0.806846	0.98998	0.021724	-0.0275314	0.0709794	0.387348	0.924198	A	C
rs7943101	0.00814211	-0.0172989	0.0335831	0.530486	0.0739989	0.141661	0.98998	-0.0041162	-0.0382653	0.0300329	0.813241	0.991222	C	T
rs34298980	0.0104188	-0.0221792	0.0430168	0.531032	0	0.460952	0.98998	0.0161544	-0.0300084	0.0623172	0.492789	0.970833	T	C
rs6518681	-0.0101665	-0.042401	0.022068	0.536472	0.661866	0.0150141	0.98998	-0.0190742	-0.0743447	0.0361963	0.498789	0.971881	A	G
rs77464186	-0.00786306	-0.0327997	0.0170735	0.536562	0.0575153	0.145192	0.98998	-0.00451745	-0.048948	0.0399131	0.842045	0.991222	A	C
rs17684074	-0.00940874	-0.0392819	0.0204644	0.537035	0	0.681636	0.98998	-0.00770379	-0.0504038	0.0349963	0.723632	0.991222	G	C
rs3751837	-0.00873429	-0.0364673	0.0189988	0.537054	0	0.399483	0.98998	-0.00461805	-0.0440152	0.0347791	0.818291	0.991222	C	T
rs39328	0.0104623	-0.0227599	0.0436845	0.537083	0	0.174508	0.98998	0.0102981	-0.0371422	0.0577384	0.670502	0.991222	C	T
rs55653563	0.0123383	-0.0275582	0.0522349	0.544425	0.420317	0.0632455	0.98998	0.0110803	-0.0305666	0.0527273	0.602049	0.991222	A	C
rs11688682	-0.00876557	-0.0371868	0.0196557	0.545522	0	0.688234	0.98998	0.00919184	-0.0319824	0.0503661	0.661715	0.991222	G	C
rs12802972	-0.010193	-0.0433571	0.0229711	0.546911	0	0.331721	0.98998	-0.0155035	-0.0780685	0.0470614	0.627196	0.991222	G	A
rs3772071	0.0207793	-0.0478362	0.0893948	0.552813	0.786595	0.00220341	0.98998	0.0421918	-0.00262818	0.0870117	0.0650325	0.797844	C	T
rs116953931	0.00375559	-0.00867537	0.0161866	0.553759	0	0.412879	0.98998	-0.0149696	-0.0504868	0.0205476	0.408762	0.940929	G	A
rs2102278	0.00948725	-0.0219221	0.0408966	0.553843	0	0.407034	0.98998	-0.00978458	-0.054383	0.0348138	0.667194	0.991222	A	G
rs279744	0.013536	-0.0320285	0.0591005	0.560397	0.484035	0.0489745	0.98998	0.0162906	-0.0281217	0.0607029	0.472188	0.96308	C	A
rs5213	0.00959435	-0.0229598	0.0421485	0.563507	0	0.60337	0.98998	0.032441	-0.0141642	0.0790462	0.172476	0.797844	C	T
rs878521	-0.0084905	-0.0373422	0.0203612	0.564089	0	0.22082	0.98998	0.0386075	-0.00245658	0.0796716	0.0653709	0.797844	G	A
rs35913461	0.00719619	-0.0172889	0.0316813	0.564591	0	0.523792	0.98998	0.0185292	-0.0166072	0.0536656	0.301329	0.916204	C	T
rs114447556	0.00491472	-0.0118656	0.0216951	0.565937	0	0.174276	0.98998	0.00698831	-0.0168944	0.0308711	0.566304	0.991222	C	T
rs9828772	-0.0056286	-0.0251287	0.0138715	0.571576	0	0.496785	0.98998	0.00116392	-0.0264112	0.0287391	0.934068	0.991222	C	G
rs60276348	-0.00729291	-0.032748	0.0181622	0.574436	0.272904	0.0972138	0.98998	-0.00296323	-0.0474462	0.0415197	0.896121	0.991222	C	T
rs244665	0.0135265	-0.0337192	0.0607723	0.574702	0.55081	0.034851	0.98998	0.0211665	-0.0521527	0.0944856	0.571516	0.991222	G	A
rs862016	0.00474548	-0.011848	0.0213389	0.575125	0	0.196337	0.98998	0.0199249	-0.025908	0.0657578	0.394184	0.927882	G	A
rs4148856	0.00776945	-0.0194693	0.0350082	0.576128	0	0.241627	0.98998	0.00193862	-0.0370292	0.0409064	0.922324	0.991222	G	C
rs2925979	0.0138171	-0.0362241	0.0638583	0.588387	0.583848	0.0283619	0.98998	0.0195462	-0.0424519	0.0815444	0.536628	0.991222	T	C
rs80244329	0.00420398	-0.0112192	0.0196272	0.593177	0.664972	0.0145542	0.98998	-0.00525646	-0.0236268	0.0131139	0.574919	0.991222	G	A
rs62482405	-0.00700098	-0.0327663	0.0187643	0.594336	0.440169	0.0587437	0.98998	0.0125492	-0.0134336	0.038532	0.343831	0.924198	T	G
rs62059712	0.00455125	-0.012316	0.0214185	0.596909	0	0.474482	0.98998	-0.00654098	-0.0303211	0.0172392	0.589812	0.991222	T	C
rs231361	0.00782465	-0.0212417	0.036891	0.597762	0.017274	0.153698	0.98998	0.0188071	-0.0223131	0.0599274	0.370024	0.924198	G	A
rs2796441	-0.00872951	-0.0412094	0.0237503	0.598351	0	0.450761	0.98998	-0.0432553	-0.0897678	0.00325724	0.0683475	0.797844	G	A
rs3768321	-0.00856291	-0.0404288	0.0233029	0.598418	0.204282	0.112878	0.98998	-0.0257103	-0.0800034	0.0285828	0.353338	0.924198	G	T
rs149364428	0.00218749	-0.00596696	0.0103419	0.599044	0.549765	0.0350627	0.98998	0.00339789	-0.00381209	0.0106079	0.355652	0.924198	G	A
rs862320	-0.00867368	-0.0415202	0.0241729	0.604764	0	0.211333	0.98998	0.0133238	-0.0336804	0.0603279	0.578505	0.991222	C	T
rs649961	0.00861045	-0.0246201	0.041841	0.611558	0	0.518578	0.98998	0.0118605	-0.0357022	0.0594232	0.62502	0.991222	T	C
rs4736819	0.00853808	-0.0245751	0.0416513	0.613301	0	0.192894	0.98998	-0.000727636	-0.0479668	0.0465116	0.975916	0.991222	C	T
rs1296328	-0.00982072	-0.0483132	0.0286718	0.617038	0.209117	0.111784	0.98998	-0.00102461	-0.0487368	0.0466876	0.966427	0.991222	A	C
rs17802463	-0.00749443	-0.0369493	0.0219604	0.617998	0	0.360606	0.98998	-0.0230176	-0.0825622	0.036527	0.448664	0.96308	G	T
rs601945	-0.0107466	-0.0533305	0.0318373	0.620867	0.607472	0.0239924	0.98998	0.00253126	-0.0581206	0.0631832	0.934808	0.991222	A	G
rs10908278	0.00815687	-0.0251852	0.0414989	0.63159	0	0.196017	0.98998	-0.00643761	-0.0643875	0.0515122	0.827639	0.991222	T	A
rs8046545	0.00775148	-0.0241195	0.0396224	0.633581	0	0.345427	0.98998	0.00200026	-0.0435344	0.0475349	0.931389	0.991222	G	A
rs6545714	0.00916671	-0.0287109	0.0470443	0.635265	0.222341	0.108782	0.98998	0.0400196	-0.0329877	0.113027	0.282656	0.915266	G	A
rs76251711	-0.00212329	-0.0110042	0.00675764	0.639358	0.257779	0.100688	0.98998	-0.00113886	-0.0107855	0.0085078	0.817013	0.991222	A	G
rs116913033	-0.00571635	-0.0297149	0.0182822	0.640604	0	0.523792	0.98998	-0.00969979	-0.0562388	0.0368392	0.682906	0.991222	C	T
rs138337556	-0.000559694	-0.00295125	0.00183187	0.646458	0	0.50597	0.98998	-0.00334073	-0.00670811	2.66517e-05	0.051841	0.783375	A	G
rs2028150	0.0126077	-0.0417445	0.0669599	0.649369	0.599852	0.0253744	0.98998	0.0309284	-0.0348474	0.0967043	0.35674	0.924198	C	G
rs34454109	0.0063882	-0.0212309	0.0340073	0.650309	0	0.481993	0.98998	0.00465957	-0.0347336	0.0440527	0.816669	0.991222	A	T
rs963740	0.00681942	-0.023062	0.0367008	0.654662	0	0.222087	0.98998	0.0145655	-0.0469622	0.0760933	0.642659	0.991222	A	T
rs191830490	0.000909069	-0.00308289	0.00490103	0.655357	0	0.879848	0.98998	0.00154054	-0.00401817	0.00709925	0.587004	0.991222	G	A
rs11708067	0.00627359	-0.0213411	0.0338882	0.656124	0	0.376651	0.98998	-0.0109595	-0.0591643	0.0372454	0.655885	0.991222	A	G
rs34855922	0.00641106	-0.022098	0.0349201	0.659391	0	0.182494	0.98998	0.0158417	-0.0245348	0.0562181	0.441899	0.96308	A	G
rs76549217	-0.00216677	-0.0118319	0.00749837	0.660377	0	0.177148	0.98998	-0.0136739	-0.041118	0.0137701	0.328792	0.924198	C	T
rs148766658	0.00277424	-0.00965153	0.0152	0.661682	0	0.662329	0.98998	-0.0134844	-0.0310446	0.00407575	0.13231	0.797844	T	C
rs4281707	-0.00746722	-0.0409459	0.0260114	0.661996	0	0.304475	0.98998	-0.0178578	-0.0656461	0.0299305	0.463917	0.96308	G	A
rs1516728	0.00622855	-0.0221857	0.0346428	0.667462	0	0.57665	0.98998	-0.0068865	-0.047383	0.03361	0.738912	0.991222	T	A
rs6821438	0.00900019	-0.0322592	0.0502596	0.668986	0.293643	0.0924361	0.98998	0.0153718	-0.0564397	0.0871832	0.674819	0.991222	A	G
rs62368490	-0.00380071	-0.0215305	0.0139291	0.674372	0.562347	0.0325398	0.98998	-0.0189064	-0.0443048	0.0064921	0.144571	0.797844	C	T
rs3934712	0.00579944	-0.0215575	0.0331564	0.677779	0	0.38504	0.98998	0.00160781	-0.0399631	0.0431787	0.939575	0.991222	T	C
rs78025551	-0.00559068	-0.0320196	0.0208383	0.678432	0.310271	0.0885965	0.98998	-0.00875781	-0.0391773	0.0216616	0.572566	0.991222	C	G
rs4688760	0.00665844	-0.0248441	0.0381609	0.678682	0	0.32692	0.98998	0.020455	-0.0381001	0.0790101	0.493551	0.970833	C	T
rs3802177	-0.00874908	-0.0501783	0.0326801	0.678942	0.429485	0.0611616	0.98998	-0.0329253	-0.0854754	0.0196247	0.21944	0.846193	G	A
rs7240767	0.00989837	-0.0374883	0.057285	0.682241	0.481959	0.0494298	0.98998	-0.0255357	-0.0869957	0.0359244	0.415454	0.941696	T	C
rs10193538	-0.00678979	-0.0393147	0.0257352	0.682426	0	0.359006	0.98998	0.00665451	-0.0397808	0.0530898	0.778805	0.991222	G	T
rs6884702	0.00685831	-0.0260892	0.0398058	0.683286	0	0.754653	0.98998	0.0135958	-0.0511847	0.0783763	0.680818	0.991222	A	G
rs73224262	0.00110855	-0.00431149	0.00652859	0.688518	0	0.764868	0.98998	0.0029378	-0.00485699	0.0107326	0.460092	0.96308	C	T
rs28505901	0.00596776	-0.0232762	0.0352117	0.689181	0	0.571904	0.98998	0.0509527	0.00936161	0.0925438	0.0163447	0.67867	A	G
rs4238013	-0.00553328	-0.0326637	0.0215971	0.68935	0	0.290557	0.98998	-0.031457	-0.0706533	0.00773931	0.115726	0.797844	C	T
rs72631105	-0.00522672	-0.0309959	0.0205425	0.690972	0	0.408131	0.98998	-0.00878615	-0.045335	0.0277627	0.637522	0.991222	G	A
rs62080313	0.00505269	-0.0198743	0.0299796	0.691157	0.215187	0.110407	0.98998	0.00804441	-0.0466021	0.062691	0.772947	0.991222	T	C
rs362307	-0.00383608	-0.023057	0.0153849	0.695675	0.136567	0.128021	0.98998	-0.0100107	-0.0350049	0.0149836	0.432453	0.958917	C	T
rs1061810	-0.00602678	-0.0364442	0.0243907	0.697765	0	0.209998	0.98998	-0.00588858	-0.0492717	0.0374945	0.790213	0.991222	C	A
rs56337234	0.00742117	-0.0301357	0.044978	0.698545	0.106222	0.134682	0.98998	0.00454142	-0.0722002	0.0812831	0.907663	0.991222	C	T
rs10195252	-0.0063846	-0.039086	0.0263168	0.701971	0	0.30707	0.98998	-0.0339362	-0.0807463	0.0128738	0.155337	0.797844	T	C
rs177045	0.010495	-0.0439105	0.0649006	0.705367	0.62926	0.020199	0.98998	0.0146605	-0.0356843	0.0650054	0.568172	0.991222	A	G
rs825452	-0.0062761	-0.0391779	0.0266257	0.708502	0	0.364616	0.98998	-0.00624894	-0.0531953	0.0406974	0.794179	0.991222	G	A
rs4977213	-0.00646714	-0.0405388	0.0276045	0.709877	0.0802236	0.14032	0.98998	-0.00284892	-0.0490434	0.0433456	0.90379	0.991222	C	T
rs1316776	-0.00631924	-0.0397393	0.0271008	0.710936	0.0788925	0.140607	0.98998	0.0199908	-0.0547374	0.094719	0.600059	0.991222	C	A
rs13041756	0.00394801	-0.0170645	0.0249605	0.712683	0	0.293183	0.98998	0.0152335	-0.0148116	0.0452785	0.320349	0.920439	T	C
rs17772814	-0.00625129	-0.0396594	0.0271568	0.713808	0.751273	0.00457316	0.98998	-0.00434111	-0.0408702	0.032188	0.815822	0.991222	G	A
rs2727301	-0.00529485	-0.0343552	0.0237656	0.721011	0	0.511566	0.98998	-0.00565533	-0.0471362	0.0358255	0.789305	0.991222	T	C
rs445084	0.00580944	-0.0269853	0.0386041	0.728442	0	0.191472	0.98998	-0.0100083	-0.0568722	0.0368556	0.675529	0.991222	A	G
rs286925	-0.00457264	-0.0306845	0.0215392	0.73143	0	0.664777	0.98998	-0.045936	-0.0833422	-0.00852977	0.0160887	0.67867	A	G
rs11688931	-0.00658874	-0.0443097	0.0311322	0.732089	0.567895	0.0314449	0.98998	0.0220148	-0.0488225	0.0928521	0.542446	0.991222	C	G
rs11842871	-0.00573163	-0.0385675	0.0271043	0.732261	0.181779	0.11795	0.98998	-0.00433691	-0.0455739	0.0369001	0.836689	0.991222	G	T
rs11717959	0.00554427	-0.0265636	0.0376522	0.735032	0	0.257876	0.98998	-0.00207332	-0.0480335	0.0438869	0.929546	0.991222	G	T
rs7115753	-0.00572752	-0.038927	0.027472	0.735266	0	0.404479	0.98998	-0.0446136	-0.09193	0.00270282	0.0646014	0.797844	A	G
rs17791513	0.0027297	-0.0131317	0.0185911	0.735887	0	0.42959	0.98998	-0.00365359	-0.0264155	0.0191084	0.753066	0.991222	A	G
rs2307111	0.00557334	-0.0271155	0.0382622	0.738254	0	0.235899	0.98998	0.0314748	-0.0795411	0.142491	0.578429	0.991222	T	C
rs145678014	0.00228875	-0.0112939	0.0158714	0.741201	0	0.412794	0.98998	-0.00246249	-0.0218648	0.0169398	0.803551	0.991222	G	T
rs34715063	-0.00500267	-0.0350384	0.0250331	0.744087	0.427638	0.0615806	0.98998	-0.0101498	-0.0396594	0.0193599	0.500233	0.971881	T	C
rs77864822	-0.00265381	-0.0187123	0.0134047	0.746013	0	0.543256	0.98998	-0.00219515	-0.0251461	0.0207558	0.851299	0.991222	A	G
rs117483894	-0.00203976	-0.0145546	0.0104751	0.749387	0	0.16196	0.98998	-0.00683127	-0.031867	0.0182045	0.592791	0.991222	A	G
rs28819812	-0.00702314	-0.0507712	0.0367249	0.753031	0.42775	0.0615554	0.98998	0.0248892	-0.0763004	0.126079	0.629746	0.991222	C	A
rs536643418	0.000380288	-0.00201249	0.00277306	0.75542	0	0.190302	0.98998	0.00121103	-0.00436014	0.00678221	0.670074	0.991222	C	G
rs35352848	-0.00956841	-0.0698203	0.0506835	0.755606	0.77873	0.00264319	0.98998	-0.00815415	-0.0654741	0.0491658	0.780384	0.991222	T	C
rs4923543	-0.00495923	-0.0363974	0.0264789	0.757188	0	0.260186	0.98998	0.000760297	-0.0565526	0.0580732	0.979257	0.991222	G	A
rs77136196	-0.0020956	-0.0155696	0.0113784	0.760494	0	0.159851	0.98998	0.00378622	-0.0151827	0.0227552	0.695641	0.991222	C	T
rs76197067	0.000133632	-0.000741711	0.00100897	0.764778	0.473924	0.0511995	0.98998	0.00097713	-0.00139843	0.00335269	0.420136	0.947047	A	G
rs3810291	-0.00890532	-0.0692288	0.0514181	0.77232	0.699953	0.00982899	0.98998	-0.0238987	-0.0692397	0.0214422	0.301568	0.916204	G	A
rs67232546	0.00395796	-0.0230805	0.0309964	0.774185	0	0.258036	0.98998	0.00241939	-0.0596256	0.0644644	0.939079	0.991222	C	T
rs72926932	-0.0027296	-0.0214102	0.015951	0.77458	0	0.191363	0.98998	-0.00573283	-0.0337167	0.0222511	0.688036	0.991222	A	C
rs111827885	-0.00129644	-0.0103375	0.00774461	0.778673	0.552282	0.0345536	0.98998	0.000211263	-0.0100254	0.010448	0.967735	0.991222	T	C
rs555759341	-0.000354233	-0.00282878	0.00212031	0.779039	0	0.223731	0.98998	-0.000776562	-0.0041302	0.00257708	0.64994	0.991222	G	C
rs543786825	0.000237299	-0.00143177	0.00190637	0.780509	0.57326	0.0303971	0.98998	0.0004383	-0.000759765	0.00163636	0.473354	0.96308	C	T
rs2908334	-0.00586223	-0.0471405	0.0354161	0.780745	0.342191	0.0812161	0.98998	-0.004217	-0.0514716	0.0430376	0.861152	0.991222	C	T
rs3845281	-0.00268357	-0.021645	0.0162779	0.781481	0	0.542144	0.98998	-0.000324327	-0.0271962	0.0265476	0.981127	0.991222	G	A
rs6459733	0.00433399	-0.0265257	0.0351937	0.783116	0	0.451107	0.98998	0.0190202	-0.0248734	0.0629138	0.395714	0.927882	G	C
rs12920022	-0.00341198	-0.027721	0.020897	0.783241	0	0.389014	0.98998	-0.0193125	-0.0537979	0.0151729	0.272371	0.914533	T	A
rs78408340	-0.000677049	-0.00550337	0.00414927	0.783355	0	0.339506	0.98998	-0.00745948	-0.0143073	-0.0006117	0.0327574	0.783375	C	G
rs558308082	-0.000128722	-0.00104875	0.000791306	0.783914	0	0.292481	0.98998	-8.74878e-05	-0.00228944	0.00211447	0.937929	0.991222	G	C
rs115505614	0.00204313	-0.0128796	0.0169658	0.788432	0	0.748155	0.98998	-0.00854828	-0.0295765	0.0124799	0.425593	0.953947	C	T
rs1575972	-0.00146283	-0.0125696	0.00964396	0.7963	0	0.288139	0.98998	-0.00996552	-0.0314341	0.011503	0.362928	0.924198	T	A
rs59944054	0.00379323	-0.0251084	0.0326949	0.796995	0	0.334198	0.98998	-0.0114101	-0.0777745	0.0549543	0.736134	0.991222	G	A
rs35999103	-0.0043472	-0.037612	0.0289176	0.797845	0.415565	0.0643287	0.98998	-0.0127126	-0.0473618	0.0219366	0.47208	0.96308	C	T
rs1359790	0.00380515	-0.0257069	0.0333172	0.800493	0	0.816336	0.98998	0.030062	-0.0120495	0.0721734	0.161767	0.797844	G	A
rs57235767	-0.0039204	-0.0347974	0.0269566	0.803474	0	0.316444	0.98998	0.0364585	-0.00767609	0.080593	0.105431	0.797844	C	T
rs1580278	0.00405289	-0.027891	0.0359968	0.803615	0	0.46092	0.98998	-0.00135789	-0.046841	0.0441253	0.953339	0.991222	C	A
rs7078559	0.00680562	-0.0469602	0.0605715	0.804065	0.587112	0.0277437	0.98998	0.0464426	-0.0196318	0.112517	0.168319	0.797844	C	T
rs340874	0.00666398	-0.047223	0.0605509	0.808485	0.592265	0.0267767	0.98998	0.013152	-0.0500704	0.0763745	0.683475	0.991222	T	C
rs2066827	0.00663974	-0.0474761	0.0607556	0.80996	0.761824	0.00375808	0.98998	0.0260356	-0.00688056	0.0589518	0.121077	0.797844	T	G
rs61881115	0.00285602	-0.0206111	0.0263231	0.811467	0	0.817815	0.98998	0.0126718	-0.0278889	0.0532326	0.540323	0.991222	G	A
rs78020297	0.00167381	-0.0121864	0.015534	0.812896	0	0.248694	0.98998	-0.00274055	-0.0234914	0.0180103	0.79575	0.991222	G	A
rs180988137	-0.00198828	-0.0185354	0.0145588	0.813815	0.806654	0.00129884	0.98998	-0.0018354	-0.0168093	0.0131385	0.810145	0.991222	A	G
rs3217860	0.00597459	-0.0439658	0.055915	0.814613	0.651634	0.0165725	0.98998	0.00531307	-0.0336552	0.0442814	0.789294	0.991222	A	G
rs562386202	-0.000185586	-0.00179695	0.00142578	0.821407	0.232352	0.106503	0.98998	-0.000702895	-0.00255296	0.00114717	0.456484	0.96308	A	G
rs76263492	-0.00156252	-0.0151395	0.0120144	0.82154	0.168601	0.120903	0.98998	-0.00390148	-0.0209691	0.0131661	0.654133	0.991222	G	T
rs11793035	-0.00350655	-0.0345931	0.02758	0.825028	0	0.1963	0.98998	-0.0080724	-0.0520197	0.0358749	0.718837	0.991222	C	T
rs13024606	0.00192962	-0.0152162	0.0190754	0.825421	0.377974	0.0729528	0.98998	0.000714197	-0.0246271	0.0260555	0.955949	0.991222	C	T
rs61676547	-0.00309395	-0.0306223	0.0244344	0.825651	0	0.179646	0.98998	0.000293137	-0.0519298	0.0525161	0.991222	0.991222	G	C
rs1333052	-0.00430642	-0.0427117	0.0340988	0.826048	0.297057	0.0916483	0.98998	-0.0315594	-0.089447	0.0263281	0.285275	0.916204	A	C
rs12680028	-0.00599411	-0.0595155	0.0475273	0.826256	0.568763	0.0312746	0.98998	0.00229041	-0.0743364	0.0789173	0.953283	0.991222	C	G
rs6976111	0.00342298	-0.0284132	0.0352591	0.833096	0	0.213664	0.98998	-0.0484341	-0.0939877	-0.00288053	0.0371692	0.783375	C	A
rs9494624	0.00511044	-0.0437379	0.0539588	0.837534	0.563254	0.0323601	0.98998	0.00622703	-0.0376527	0.0501068	0.780904	0.991222	A	G
rs35497231	0.00327753	-0.0281975	0.0347525	0.838281	0	0.215932	0.98998	0.018124	-0.0266802	0.0629281	0.427873	0.953947	C	T
rs1708302	0.00450447	-0.0426473	0.0516562	0.851474	0.464868	0.0532074	0.98998	-0.00513464	-0.0525102	0.0422409	0.831776	0.991222	C	T
rs10893829	0.0043934	-0.0423408	0.0511276	0.853815	0.726871	0.00680951	0.98998	0.00272802	-0.046298	0.051754	0.913154	0.991222	T	C
rs3887925	-0.00539205	-0.0628048	0.0520207	0.853955	0.629018	0.0202397	0.98998	-0.0316906	-0.124828	0.0614467	0.504842	0.976187	C	T
rs9687832	0.00321742	-0.031648	0.0380828	0.856471	0.363982	0.0761802	0.98998	0.00544763	-0.0333814	0.0442766	0.783332	0.991222	G	A
rs2268078	0.00552186	-0.0552845	0.0663282	0.858734	0.701207	0.009676	0.98998	0.0239269	-0.0410321	0.0888858	0.470338	0.96308	G	A
rs3217792	0.00250935	-0.0253096	0.0303283	0.85967	0.595213	0.0262288	0.98998	-0.00306498	-0.0400835	0.0339535	0.871088	0.991222	C	T
rs35654957	-0.00293788	-0.0356787	0.0298029	0.860396	0	0.175181	0.98998	-0.0381391	-0.0847864	0.00850816	0.10905	0.797844	T	C
rs141521721	0.000838797	-0.00864543	0.010323	0.862383	0	0.866742	0.98998	0.00323102	-0.0112705	0.0177325	0.662336	0.991222	C	A
rs11070332	-0.00275478	-0.0346718	0.0291622	0.865666	0	0.816022	0.98998	0.0160353	-0.0294509	0.0615215	0.489598	0.970833	G	A
rs17836088	0.00440488	-0.0470318	0.0558415	0.866705	0.666929	0.0142676	0.98998	-0.0143277	-0.0843006	0.0556452	0.688181	0.991222	G	C
rs112595469	0.00137252	-0.014826	0.0175711	0.868102	0.457687	0.0548083	0.98998	-0.000936658	-0.0232194	0.0213461	0.934339	0.991222	C	T
rs75423501	-0.00158904	-0.0205113	0.0173332	0.869264	0	0.393925	0.98998	0.018067	-0.00860627	0.0447403	0.18432	0.797844	A	G
rs7756992	-0.0048836	-0.063115	0.0533478	0.869437	0.687285	0.0114404	0.98998	0.0252712	-0.067009	0.117551	0.591446	0.991222	A	G
rs7918400	-0.00279768	-0.0366027	0.0310073	0.871144	0	0.230918	0.98998	-0.0581662	-0.106405	-0.00992763	0.0181115	0.67867	T	C
rs41277236	0.000934624	-0.0105558	0.0124251	0.873337	0	0.566995	0.98998	0.000315422	-0.0165752	0.017206	0.970803	0.991222	C	T
rs6011155	-0.00285947	-0.0401763	0.0344573	0.880618	0.220816	0.109129	0.98998	0.0403848	-0.00535389	0.0861235	0.0835333	0.797844	T	C
rs11926707	-0.00441492	-0.0625015	0.0536716	0.881578	0.663228	0.0148116	0.98998	0.00235832	-0.0626026	0.0673193	0.943275	0.991222	T	C
rs34855406	0.00320743	-0.041232	0.0476468	0.887506	0.483601	0.0490694	0.98998	-0.0035311	-0.0469401	0.0398779	0.873328	0.991222	G	C
rs2237897	0.000898977	-0.0116311	0.013429	0.888171	0	0.349401	0.98998	-0.0119802	-0.030042	0.00608166	0.193595	0.797844	C	T
rs2283220	0.00267248	-0.0349969	0.0403419	0.88941	0.343285	0.0809631	0.98998	0.023734	-0.0164834	0.0639515	0.247412	0.889873	A	G
rs62007683	-0.00268902	-0.0407727	0.0353946	0.889932	0.263032	0.0994823	0.98998	-0.0257043	-0.111621	0.0602128	0.557625	0.991222	G	T
rs72802342	-0.0011657	-0.0177579	0.0154265	0.890479	0	0.190327	0.98998	0.0102925	-0.0133786	0.0339636	0.394095	0.927882	C	A
rs17250977	-0.000804631	-0.0123983	0.010789	0.8918	0	0.402871	0.98998	-0.00630639	-0.022719	0.0101062	0.451391	0.96308	A	G
rs74368513	0.000171863	-0.00235114	0.00269487	0.89379	0	0.222636	0.98998	9.56486e-05	-0.00352621	0.0037175	0.95872	0.991222	G	A
rs150111048	0.000182603	-0.00254509	0.0029103	0.895611	0	0.228301	0.98998	-0.00104402	-0.00483989	0.00275185	0.589839	0.991222	A	G
rs10406327	0.00222037	-0.0311118	0.0355526	0.896124	0	0.165667	0.98998	-0.0330283	-0.085789	0.0197324	0.219844	0.846193	C	G
rs62107261	0.00103302	-0.0147654	0.0168315	0.898025	0.38767	0.0707207	0.98998	0.00306719	-0.0227231	0.0288575	0.815688	0.991222	T	C
rs145904381	0.000401377	-0.005982	0.00678476	0.901918	0	0.427826	0.98998	-0.00455046	-0.0137586	0.00465769	0.33276	0.924198	T	C
rs559138871	0.000135893	-0.00207177	0.00234356	0.903972	0	0.378551	0.98998	0.00173757	-0.00140161	0.00487676	0.277983	0.914533	C	T
rs3826482	0.00189646	-0.0307916	0.0345846	0.909467	0	0.519877	0.98998	-0.0206254	-0.0673182	0.0260674	0.386618	0.924198	A	T
rs2237895	-0.00185117	-0.0353288	0.0316265	0.913696	0	0.298876	0.98998	0.0423692	-0.00542117	0.0901595	0.0822756	0.797844	A	C
rs117001013	0.00188636	-0.0335231	0.0372959	0.916842	0.724229	0.00708067	0.98998	-0.00879115	-0.0340378	0.0164555	0.494935	0.970833	C	T
rs56376556	-0.000879067	-0.0180481	0.01629	0.920065	0.318678	0.0866535	0.98998	0.00158265	-0.0195471	0.0227124	0.883287	0.991222	C	T
rs718314	0.00194991	-0.0383311	0.0422309	0.924412	0.441455	0.0584533	0.98998	0.00461913	-0.0371984	0.0464366	0.828601	0.991222	A	G
rs11042596	0.00156461	-0.0310796	0.0342088	0.925157	0.0467164	0.147491	0.98998	-0.00401636	-0.0490536	0.0410208	0.861247	0.991222	T	G
rs6780171	0.00212138	-0.0429931	0.0472358	0.926569	0.466959	0.0527425	0.98998	0.00837611	-0.0366492	0.0534014	0.715399	0.991222	T	A
rs112915006	-0.000655307	-0.0148215	0.0135108	0.927759	0	0.756924	0.98998	-0.00802337	-0.0284078	0.0123611	0.440442	0.96308	A	G
rs9563615	0.00140295	-0.0292377	0.0320436	0.928493	0	0.168014	0.98998	0.0244269	-0.0400446	0.0888984	0.45773	0.96308	A	T
rs73226260	-0.000545922	-0.0127226	0.0116307	0.929978	0.0613515	0.144373	0.98998	-0.00462284	-0.0213575	0.0121119	0.588214	0.991222	G	A
rs11709077	0.00102374	-0.0234577	0.0255052	0.934679	0.157638	0.123349	0.98998	0.00254495	-0.0290988	0.0341887	0.874748	0.991222	G	A
rs1127215	0.00128939	-0.0316663	0.0342451	0.938875	0	0.182136	0.98998	-0.0136998	-0.0607288	0.0333293	0.568036	0.991222	C	T
rs12640250	0.00105102	-0.0289555	0.0310575	0.945268	0	0.362047	0.98998	-0.0205066	-0.0631867	0.0221736	0.346344	0.924198	A	C
rs3115960	-0.00107902	-0.0332645	0.0311064	0.94761	0	0.326338	0.98998	-0.0194177	-0.0652091	0.0263738	0.405909	0.940929	G	C
rs1561927	-0.000923644	-0.0297259	0.0278786	0.949883	0	0.251115	0.98998	0.0211372	-0.0197762	0.0620505	0.31126	0.916204	C	T
rs6063048	-0.00194183	-0.0631741	0.0592904	0.950439	0.74351	0.00523167	0.98998	0.0351497	-0.0725403	0.14284	0.52235	0.987606	G	A
rs1800961	-0.000321083	-0.013238	0.0125958	0.961143	0	0.660313	0.98998	-0.00107349	-0.0196365	0.0174895	0.909758	0.991222	C	T
rs3774723	-0.000568368	-0.0248569	0.0237202	0.963418	0	0.779764	0.98998	-0.00461101	-0.0394843	0.0302623	0.79552	0.991222	G	A
rs2197973	0.00119864	-0.0516865	0.0540838	0.964568	0.554886	0.0340293	0.98998	0.0322944	-0.0158949	0.0804836	0.18902	0.797844	C	T
rs34584161	0.00106348	-0.0462692	0.0483961	0.964875	0.620941	0.0216186	0.98998	-0.0271096	-0.0670819	0.0128627	0.18376	0.797844	A	G
rs11202627	-0.000525668	-0.0246908	0.0236395	0.965992	0	0.32535	0.98998	0.00389133	-0.0302913	0.038074	0.823441	0.991222	C	T
rs4804833	0.000716129	-0.032315	0.0337473	0.966106	0	0.829455	0.98998	0.0123483	-0.034824	0.0595206	0.607909	0.991222	A	G
rs465002	-0.000599206	-0.029582	0.0283836	0.967678	0	0.553274	0.98998	0.00713752	-0.0344619	0.0487369	0.736656	0.991222	C	T
rs12048743	0.00123465	-0.0626062	0.0650755	0.969764	0.693087	0.0106878	0.98998	-0.00396552	-0.0648818	0.0569507	0.898474	0.991222	C	G
rs1005752	0.000995082	-0.0512871	0.0532773	0.970243	0.631825	0.0197687	0.98998	-0.022575	-0.0707046	0.0255547	0.357933	0.924198	C	A
rs1043246	0.000387319	-0.0208104	0.021585	0.971432	0	0.257139	0.98998	0.00164872	-0.0280483	0.0313457	0.913351	0.991222	C	G
rs4976033	0.000927223	-0.0515834	0.0534379	0.972392	0.560391	0.0329284	0.98998	0.0324	-0.0151509	0.0799508	0.181723	0.797844	A	G
rs10097617	0.000412319	-0.0331279	0.0339525	0.980777	0	0.398204	0.990617	-0.000570026	-0.0581318	0.0569918	0.984515	0.991222	T	C
rs80102379	-7.98257e-05	-0.00696729	0.00680764	0.981877	0	0.523424	0.990617	-0.000551784	-0.0106634	0.00955981	0.914825	0.991222	G	T
rs7669833	0.000330025	-0.0305807	0.0312408	0.983305	0.0154285	0.154085	0.990617	-0.00557015	-0.0670332	0.0558929	0.859018	0.991222	T	A
rs1783541	-0.000432723	-0.0456186	0.0447531	0.985025	0.585435	0.0280607	0.990617	-0.00316447	-0.0619461	0.0556171	0.915968	0.991222	C	T
rs3111316	-0.000389833	-0.0426891	0.0419095	0.985588	0.35093	0.0791957	0.990617	0.00816777	-0.0387059	0.0550414	0.732708	0.991222	G	A
rs114526150	-7.33299e-05	-0.00977005	0.00962339	0.988174	0	0.220606	0.990689	0.00225377	-0.0116867	0.0161942	0.751342	0.991222	T	G
rs576406049	6.73264e-06	-0.0012241	0.00123757	0.991446	0	0.40554	0.991446	0.000215506	-0.00157164	0.00200265	0.813164	0.991222	C	T

## Sheet: SIRD
SIRD
Unadjusted model								Adjusted model
Variable	Effect	Lower	Upper	P-value	I2	Heterogeneity	P-value (FDR)	Effect	Lower	Upper	P-value	P-value (FDR)	REF	ALT
rs3802177	0.0711648	0.0383027	0.104027	2.19168e-05	0.0875524	0.138737	0.00863524	0.0605805	0.0211006	0.10006	0.00263412	0.537361	G	A
rs10811660	0.0495112	0.0247787	0.0742437	8.7237e-05	0	0.592786	0.0171857	0.0197042	-0.0112452	0.0506535	0.212094	0.982551	G	A
rs7903146	-0.101959	-0.154865	-0.0490522	0.00015864	0.615436	0.0225778	0.0208347	-0.00449845	-0.0451787	0.0361819	0.828416	0.999527	C	T
rs11708067	0.0525459	0.0235847	0.081507	0.00037644	0	0.314744	0.0370794	0.00100323	-0.0406257	0.0426321	0.962327	0.999527	A	G
rs243024	-0.0639593	-0.100548	-0.0273711	0.000612128	0.0953316	0.137052	0.0482357	-0.0249578	-0.068379	0.0184634	0.25993	0.982551	G	A
rs13737	-0.049266	-0.0790699	-0.019462	0.00119604	0.0343359	0.150112	0.0785399	-0.0470894	-0.0835864	-0.0105925	0.0114452	0.734028	G	T
rs80147536	0.0292995	0.00982094	0.0487781	0.0031967	0	0.444156	0.179832	0.0179224	-0.00667311	0.042518	0.153235	0.982551	A	T
rs62370480	0.0435541	0.014187	0.0729213	0.00365142	0	0.692181	0.179832	0.0481146	0.0114002	0.084829	0.0102124	0.734028	G	A
rs2066827	-0.0362774	-0.0613277	-0.011227	0.00453434	0	0.280073	0.198504	-0.0232974	-0.0540491	0.00745436	0.137581	0.982551	T	G
rs340874	-0.0468024	-0.0810007	-0.0126041	0.00731116	0	0.369307	0.221773	-0.0571367	-0.110651	-0.00362252	0.0363814	0.744201	T	C
rs917195	-0.0375356	-0.0652117	-0.00985959	0.0078559	0	0.235373	0.221773	-0.0330946	-0.0815454	0.0153561	0.180646	0.982551	C	T
rs474513	-0.0472597	-0.082142	-0.0123774	0.00792093	0	0.284269	0.221773	-0.0404929	-0.0840986	0.00311292	0.0687519	0.907433	A	G
rs6780171	-0.0442295	-0.0770934	-0.0113657	0.00834462	0	0.401098	0.221773	-0.0423065	-0.0833594	-0.00125366	0.0434024	0.769921	T	A
rs77464186	0.0325761	0.00762853	0.0575236	0.0104887	0	0.341335	0.221773	-0.00930994	-0.0404684	0.0218485	0.558128	0.999527	A	C
rs35352848	0.0569492	0.0133275	0.100571	0.010504	0.582097	0.0286953	0.221773	0.0303691	-0.0144472	0.0751853	0.184132	0.982551	T	C
rs78025551	0.0288169	0.00674343	0.0508903	0.0105055	0	0.612731	0.221773	0.000744791	-0.0353165	0.0368061	0.96771	0.999527	C	G
rs58730668	0.030688	0.00713271	0.0542433	0.010666	0	0.227552	0.221773	-0.00165304	-0.0311322	0.0278261	0.912485	0.999527	T	C
rs12001437	-0.0441875	-0.0782091	-0.010166	0.0109084	0	0.331431	0.221773	-0.0221694	-0.0646093	0.0202705	0.305917	0.982551	T	C
rs116953931	-0.0168344	-0.029843	-0.00382586	0.0112	0	0.17808	0.221773	-0.0224634	-0.0408374	-0.00408946	0.0165665	0.744201	G	A
rs10962	-0.0333721	-0.0594505	-0.00729379	0.0121368	0	0.56027	0.221773	-0.0306781	-0.0629265	0.00157026	0.0622476	0.902432	G	C
rs13085136	0.0222937	0.00487236	0.0397151	0.0121375	0	0.251097	0.221773	0.0143272	-0.00743145	0.0360859	0.196857	0.982551	C	T
rs10097617	0.0447648	0.00968431	0.0798454	0.0123833	0	0.393719	0.221773	0.035108	-0.0087952	0.0790112	0.11704	0.942702	T	C
rs140242150	-0.00386193	-0.00694467	-0.000779194	0.0140741	0	0.431758	0.240641	-0.00490599	-0.00864835	-0.00116364	0.0101877	0.734028	G	A
rs17772814	0.020309	0.00400027	0.0366177	0.0146583	0	0.49097	0.240641	0.0108568	-0.00940232	0.0311158	0.293563	0.982551	G	A
rs703972	0.0421228	0.00726871	0.076977	0.0178503	0	0.235715	0.281321	0.0231833	-0.0203218	0.0666885	0.296282	0.982551	G	C
rs7847880	-0.036264	-0.066476	-0.00605206	0.0186435	0.308053	0.0891091	0.28252	-0.053341	-0.0846426	-0.0220394	0.000837882	0.341856	T	C
rs286925	0.0355646	0.00558232	0.0655469	0.0200782	0.192338	0.115575	0.292992	0.04302	0.00960309	0.0764369	0.0116291	0.734028	A	G
rs76895963	0.0083832	0.00108305	0.0156833	0.0244017	0	0.337636	0.337021	0.00674644	-0.00231916	0.015812	0.144685	0.982551	T	G
rs76263492	-0.0144129	-0.0269992	-0.00182661	0.0248061	0	0.545754	0.337021	-0.0168073	-0.0322938	-0.00132085	0.0334092	0.744201	G	T
rs1800574	-0.0160313	-0.0303048	-0.00175787	0.0277115	0.248373	0.102843	0.351345	-0.00369316	-0.0257508	0.0183644	0.742789	0.999527	C	T
rs8037894	0.0386149	0.00408077	0.073149	0.0284109	0	0.476315	0.351345	0.00360176	-0.0395746	0.0467781	0.870125	0.999527	G	C
rs17168486	-0.0297783	-0.056741	-0.00281552	0.0304161	0	0.17923	0.351345	-0.024407	-0.0581092	0.00929522	0.155783	0.982551	C	T
rs1426371	0.0328041	0.00306674	0.0625414	0.0306112	0	0.417686	0.351345	0.00696319	-0.0367325	0.0506589	0.754787	0.999527	G	A
rs2052261	0.0351063	0.00319576	0.0670168	0.0310642	0	0.201981	0.351345	0.0336247	-0.00624484	0.0734943	0.0983367	0.933056	G	A
rs11657492	-0.0226235	-0.0432054	-0.00204154	0.0312108	0	0.462047	0.351345	-0.0028596	-0.0287436	0.0230244	0.828573	0.999527	T	G
rs2307111	-0.0366085	-0.0706871	-0.00252989	0.0352508	0	0.63486	0.363139	-0.0347784	-0.0773858	0.00782898	0.109637	0.942702	T	C
rs7240767	-0.0461845	-0.0892541	-0.0031148	0.0355788	0.374218	0.0738186	0.363139	-0.0251379	-0.073615	0.0233392	0.309466	0.982551	T	C
rs1043246	-0.0239002	-0.0464911	-0.00130924	0.0381209	0	0.354704	0.363139	-0.0237721	-0.0514692	0.00392505	0.0925279	0.928566	C	G
rs1316776	-0.034779	-0.0677098	-0.00184834	0.0384549	0	0.160949	0.363139	-0.0202278	-0.0612373	0.0207818	0.333672	0.995671	C	A
rs76011118	-0.0117567	-0.0229223	-0.000591172	0.0390427	0	0.194463	0.363139	-0.00575971	-0.0196663	0.00814689	0.416929	0.999527	G	A
rs4686471	-0.0354509	-0.0692258	-0.001676	0.0396648	0	0.80687	0.363139	0.00757976	-0.0375231	0.0526826	0.741867	0.999527	T	C
rs10882101	0.0356406	0.0016542	0.069627	0.0398442	0	0.18791	0.363139	-0.00110539	-0.0435724	0.0413616	0.959312	0.999527	T	C
rs528350911	-0.00594853	-0.0116408	-0.000256316	0.0405385	0	0.707597	0.363139	-0.00148914	-0.00879043	0.00581214	0.689343	0.999527	C	G
rs1796330	0.0361699	0.00147757	0.0708623	0.0410089	0	0.346933	0.363139	0.00602731	-0.0373322	0.0493868	0.785276	0.999527	G	C
rs17122772	0.0298291	0.00115268	0.0585055	0.0414753	0	0.495965	0.363139	0.040017	0.00382785	0.0762061	0.0302138	0.744201	C	G
rs10750397	0.0327707	0.000821297	0.0647202	0.0443945	0	0.858678	0.380248	0.0327769	-0.0070591	0.0726128	0.106821	0.942702	A	G
rs1112718	0.0341868	0.000386551	0.067987	0.0474369	0	0.607648	0.397662	0.0133481	-0.0287904	0.0554865	0.534697	0.999527	A	G
rs244665	-0.0315681	-0.0630489	-8.73492e-05	0.0493677	0	0.675984	0.405227	-0.0252582	-0.0646148	0.0140985	0.208443	0.982551	G	A
rs3810291	0.0324167	-0.000418734	0.0652521	0.052994	0	0.685703	0.416546	0.0367798	-0.034197	0.107757	0.309799	0.982551	G	A
rs1412830	0.0371846	-0.000726686	0.0750958	0.054556	0.225105	0.108154	0.416546	0.0158924	-0.0255924	0.0573772	0.452747	0.999527	C	T
rs115505614	-0.0154926	-0.0313244	0.000339241	0.0551153	0	0.232753	0.416546	-5.96586e-05	-0.019772	0.0196526	0.995267	0.999527	C	T
rs7669833	0.0308637	-0.000896411	0.0626238	0.0568262	0	0.90593	0.416546	0.0059428	-0.033651	0.0455367	0.768621	0.999527	T	A
rs6458354	0.0303872	-0.000904901	0.0616794	0.0570032	0	0.904572	0.416546	-0.0266567	-0.0656124	0.012299	0.179866	0.982551	C	T
rs11820019	0.00974749	-0.000331115	0.0198261	0.0580166	0	0.166743	0.416546	0.0114536	-0.00127717	0.0241844	0.0778435	0.907433	T	C
rs9569864	-0.0260476	-0.052994	0.000898852	0.0581474	0	0.19138	0.416546	-0.00209243	-0.035891	0.0317061	0.903422	0.999527	C	T
rs10954772	0.0310071	-0.00150042	0.0635145	0.0615533	0	0.818261	0.431304	0.0234471	-0.0171197	0.0640139	0.257284	0.982551	T	C
rs28719468	0.0240888	-0.00124743	0.0494251	0.0623968	0	0.19058	0.431304	0.0297871	-0.00484892	0.0644232	0.0918774	0.928566	T	C
rs12802972	-0.041385	-0.0852392	0.00246929	0.0643705	0.376076	0.0733902	0.437276	-0.0512118	-0.110632	0.00820848	0.0911794	0.928566	G	A
rs11699802	0.0328417	-0.00215811	0.0678416	0.0658988	0	0.348288	0.44007	0.0370386	-0.00837228	0.0824494	0.109907	0.942702	C	T
rs141521721	-0.0091041	-0.018988	0.000779775	0.0710222	0	0.392896	0.466379	-0.00125816	-0.0135191	0.0110028	0.840603	0.999527	C	A
rs112915006	0.0165675	-0.00156401	0.0346991	0.0733094	0.351974	0.0789542	0.473507	0.00717279	-0.0248513	0.0391969	0.660666	0.999527	A	G
rs62059712	0.016013	-0.00188208	0.033908	0.0794599	0	0.3307	0.496244	0.00912158	-0.0132144	0.0314576	0.423473	0.999527	T	C
rs9828772	-0.0182801	-0.039041	0.00248089	0.084392	0	0.311664	0.496244	-0.0176066	-0.0437101	0.0084969	0.186175	0.982551	C	G
rs10830963	-0.05053	-0.107927	0.00686709	0.0844427	0.695972	0.0103227	0.496244	-0.0535017	-0.141843	0.0348394	0.235225	0.982551	C	G
rs17261179	-0.0306585	-0.0655014	0.00418427	0.084601	0	0.717799	0.496244	-0.0327076	-0.0761437	0.0107285	0.139981	0.982551	T	C
rs11793035	0.0285317	-0.0039911	0.0610544	0.0855338	0	0.480656	0.496244	-0.00285537	-0.042935	0.0372242	0.88895	0.999527	C	T
rs11717959	-0.0293795	-0.0628761	0.00411715	0.0856034	0	0.429151	0.496244	-0.0273841	-0.0871025	0.0323343	0.368786	0.999527	G	T
rs28505901	-0.0447125	-0.0956978	0.00627282	0.0856461	0.636545	0.0189867	0.496244	-0.00730492	-0.0603581	0.0457483	0.787261	0.999527	A	G
rs76251711	0.00668153	-0.00097629	0.0143394	0.0872493	0	0.732928	0.498206	0.00500708	-0.00455759	0.0145718	0.304874	0.982551	A	G
rs1903002	0.0302271	-0.00459812	0.0650522	0.0889089	0	0.679229	0.49986	0.0392611	-0.00659232	0.0851146	0.0933117	0.928566	C	G
rs4946812	0.0424745	-0.00681893	0.0917678	0.091251	0.548314	0.035357	0.49986	0.047427	0.00622759	0.0886263	0.0240564	0.744201	G	A
rs11257655	-0.0366538	-0.0792377	0.00593003	0.0915978	0.533907	0.0383149	0.49986	-0.0261164	-0.0723859	0.0201531	0.268603	0.982551	C	T
rs11065299	-0.0158303	-0.0343142	0.0026537	0.0932347	0	0.349619	0.49986	-0.0183842	-0.0414241	0.00465566	0.117838	0.942702	G	A
rs2249105	-0.0284695	-0.0618799	0.00494102	0.094898	0	0.67642	0.49986	-0.0215806	-0.0633004	0.0201392	0.31066	0.982551	A	G
rs4457053	0.0271309	-0.00483716	0.0590989	0.0962329	0	0.22021	0.49986	0.0223272	-0.0174563	0.0621106	0.271347	0.982551	G	A
rs4281707	0.0295773	-0.00529288	0.0644475	0.0964196	0	0.794338	0.49986	0.0555002	0.0119027	0.0990977	0.0125936	0.734028	G	A
rs539515	0.0384343	-0.00751081	0.0843793	0.101096	0.61824	0.0220874	0.513792	0.0344684	-0.000892666	0.0698295	0.0560707	0.902432	A	C
rs4736819	-0.0288128	-0.0633708	0.00574526	0.102233	0	0.45704	0.513792	0.00512955	-0.0380229	0.048282	0.815775	0.999527	C	T
rs62368490	0.00956872	-0.00193785	0.0210753	0.103127	0	0.399837	0.513792	0.0087618	-0.00802425	0.0255479	0.306289	0.982551	C	T
rs7249758	-0.023352	-0.0515307	0.00482667	0.104323	0	0.300767	0.513792	-0.0192396	-0.0544342	0.015955	0.283971	0.982551	G	A
rs1708302	0.0357755	-0.00778336	0.0793344	0.107453	0.366545	0.0755887	0.522674	0.00878191	-0.0343182	0.051882	0.689632	0.999527	C	T
rs10842994	0.0222044	-0.00497578	0.0493845	0.109342	0	0.528987	0.525373	0.0201349	-0.0171704	0.0574402	0.29012	0.982551	C	T
rs2238689	-0.0287108	-0.0641136	0.00669191	0.11195	0	0.246322	0.531427	-0.0300444	-0.0739297	0.0138409	0.179657	0.982551	T	C
rs1317617	-0.0227345	-0.050913	0.00544401	0.113809	0	0.263096	0.533816	-0.00931125	-0.0445632	0.0259407	0.604672	0.999527	G	A
rs17684074	-0.0247565	-0.055739	0.00622603	0.117325	0	0.370273	0.543834	-0.0372072	-0.0758506	0.00143625	0.0591444	0.902432	G	C
rs10193538	0.0268404	-0.00705321	0.060734	0.120639	0	0.237224	0.552693	0.0103587	-0.0319727	0.0526901	0.631504	0.999527	G	T
rs3811978	-0.0323943	-0.0739645	0.00917588	0.126677	0.601883	0.0250035	0.571245	-0.0349251	-0.0675924	-0.00225787	0.0361327	0.744201	A	G
rs17689007	0.0323905	-0.00927445	0.0740555	0.127588	0.310086	0.0886394	0.571245	0.0325668	-0.0104796	0.0756131	0.138124	0.982551	G	A
rs2197973	-0.0270169	-0.062099	0.00806512	0.131201	0	0.479507	0.575964	-0.00463682	-0.0484629	0.0391892	0.835725	0.999527	C	T
rs2642588	-0.0248019	-0.057096	0.00749213	0.132258	0	0.434329	0.575964	-0.029562	-0.069949	0.0108251	0.151393	0.982551	T	G
rs177045	-0.0322278	-0.0742743	0.00981876	0.133027	0.386614	0.0709637	0.575964	-0.00584982	-0.0468325	0.0351329	0.779659	0.999527	A	G
rs4932265	0.0236614	-0.00740135	0.0547242	0.135447	0	0.620561	0.580067	0.0079307	-0.0308578	0.0467192	0.688616	0.999527	T	C
rs3798519	-0.0242179	-0.0569345	0.00849863	0.146826	0.325123	0.0851633	0.604382	-0.0208211	-0.054136	0.0124938	0.2206	0.982551	A	C
rs11967262	0.0260773	-0.0091663	0.0613208	0.147001	0	0.557772	0.604382	0.0240914	-0.0197513	0.0679341	0.281484	0.982551	C	G
rs10937721	-0.0353318	-0.0832121	0.0125484	0.148094	0.498973	0.0457221	0.604382	-0.00177036	-0.0439375	0.0403968	0.934418	0.999527	G	C
rs11759026	-0.0284035	-0.0670809	0.0102738	0.150053	0.39249	0.0696127	0.604382	-0.00519332	-0.0477315	0.0373449	0.810885	0.999527	A	G
rs1260326	0.0341564	-0.0124173	0.0807301	0.150602	0.477621	0.0503838	0.604382	0.00443733	-0.0374019	0.0462766	0.835333	0.999527	T	C
rs10228066	-0.0253573	-0.0599908	0.00927623	0.151285	0	0.239289	0.604382	-0.0167945	-0.059992	0.0264031	0.44606	0.999527	C	T
rs738408	0.0281255	-0.0104871	0.0667381	0.153395	0.413595	0.0647784	0.604382	0.00446336	-0.0480147	0.0569415	0.867607	0.999527	C	T
rs8017808	-0.0218411	-0.0519234	0.00824123	0.15473	0	0.547939	0.604382	-0.00494117	-0.0432564	0.0333741	0.800454	0.999527	G	T
rs34855406	0.0230476	-0.00881467	0.05491	0.156266	0	0.294439	0.604382	0.035938	-0.00384985	0.0757258	0.076674	0.907433	G	C
rs1575972	0.0105372	-0.00403699	0.0251114	0.156464	0.384262	0.0715049	0.604382	0.0169326	-0.0170099	0.0508751	0.328198	0.995671	T	A
rs348330	0.0234364	-0.00913566	0.0560085	0.158468	0	0.509807	0.606178	0.00881375	-0.0317156	0.0493431	0.669944	0.999527	G	A
rs5758223	-0.022311	-0.0534539	0.00883201	0.160281	0	0.458078	0.607132	-0.010872	-0.0498099	0.0280658	0.584206	0.999527	G	A
rs2431115	0.0241504	-0.00968259	0.0579834	0.161799	0	0.554176	0.607132	0.0519559	-0.00637123	0.110283	0.0808332	0.91611	A	G
rs62107261	0.00857922	-0.00372656	0.020885	0.171805	0	0.36098	0.628524	0.0178425	0.00259632	0.0330887	0.0218059	0.744201	T	C
rs10848958	0.0170857	-0.00744715	0.0416185	0.172253	0	0.792015	0.628524	0.0172763	-0.0132964	0.0478489	0.268054	0.982551	C	T
rs7115753	0.0240809	-0.0104988	0.0586607	0.172286	0	0.159781	0.628524	0.00333511	-0.0481458	0.054816	0.898962	0.999527	A	G
rs2581787	-0.024162	-0.0590854	0.0107615	0.175096	0	0.354076	0.632916	-0.0403639	-0.0839792	0.00325148	0.0697008	0.907433	G	T
rs9860730	-0.0303808	-0.0745579	0.0137964	0.177699	0.468373	0.0524287	0.633531	0.000676581	-0.0392801	0.0406332	0.973525	0.999527	A	G
rs4148856	0.0194103	-0.00886551	0.0476861	0.178482	0	0.160628	0.633531	0.0089306	-0.0364179	0.0542791	0.699511	0.999527	G	C
rs35913461	-0.0287386	-0.0708706	0.0133933	0.181252	0.633197	0.0195402	0.633803	-0.00554928	-0.0467928	0.0356943	0.792003	0.999527	C	T
rs279744	0.022163	-0.0104763	0.0548024	0.183231	0	0.684799	0.633803	0.0280554	-0.0127695	0.0688803	0.178008	0.982551	C	A
rs6545714	-0.023058	-0.057081	0.010965	0.184079	0	0.453933	0.633803	-0.0074881	-0.0498426	0.0348664	0.728957	0.999527	G	A
rs11926707	0.0226164	-0.0108247	0.0560576	0.184993	0	0.705564	0.633803	0.0259095	-0.0157066	0.0675256	0.222374	0.982551	T	C
rs11642430	0.0224776	-0.011771	0.0567262	0.198326	0	0.22404	0.668652	-0.00609733	-0.0488641	0.0366695	0.779911	0.999527	C	G
rs61850200	-0.0202962	-0.0513261	0.0107337	0.199848	0	0.186107	0.668652	-0.0194674	-0.0579807	0.0190459	0.321828	0.987263	G	C
rs1783541	-0.0188806	-0.0477723	0.0100112	0.200256	0	0.572845	0.668652	-0.000351692	-0.0364841	0.0357807	0.98478	0.999527	C	T
rs1801212	-0.0432931	-0.110016	0.0234304	0.203476	0.784295	0.00232693	0.669719	-0.00556001	-0.0463358	0.0352158	0.789275	0.999527	G	A
rs67232546	-0.018384	-0.0468035	0.0100355	0.204848	0	0.484338	0.669719	-0.00016382	-0.0357101	0.0353824	0.992793	0.999527	C	T
rs39328	-0.0223244	-0.0568984	0.0122496	0.205675	0	0.820575	0.669719	-0.0394002	-0.0826297	0.00382921	0.0740421	0.907433	C	T
rs465002	0.0191216	-0.0107085	0.0489517	0.208982	0	0.30992	0.67491	-0.00296942	-0.0404707	0.0345318	0.876669	0.999527	C	T
rs78408340	-0.00316555	-0.00818337	0.00185227	0.216286	0	0.677529	0.684026	-0.000304537	-0.0064727	0.00586363	0.922911	0.999527	C	G
rs112498319	0.022018	-0.0129056	0.0569416	0.216577	0	0.567587	0.684026	0.022938	-0.0206076	0.0664837	0.301872	0.982551	C	A
rs13426680	0.0117194	-0.00694243	0.0303813	0.218385	0.129623	0.129553	0.684026	-0.00632208	-0.0363263	0.0236822	0.679624	0.999527	A	G
rs6884702	-0.0215614	-0.0559227	0.0127999	0.218749	0	0.294864	0.684026	-0.0128348	-0.0558031	0.0301334	0.558245	0.999527	A	G
rs1421085	0.0232959	-0.0147307	0.0613226	0.229861	0.174265	0.119636	0.70857	0.00436864	-0.0428741	0.0516113	0.856177	0.999527	T	C
rs11063028	-0.0165264	-0.0435223	0.0104695	0.230195	0	0.168557	0.70857	-0.0209803	-0.0588047	0.016844	0.276971	0.982551	T	C
rs1042725	-0.0338212	-0.0895978	0.0219553	0.234651	0.60784	0.0239263	0.710692	-0.0244877	-0.0726889	0.0237136	0.319386	0.987263	C	T
rs78403475	-0.0124306	-0.0331391	0.00827785	0.239394	0	0.365974	0.710692	-0.017193	-0.0430049	0.00861884	0.191718	0.982551	G	C
rs56337234	0.0285479	-0.0190922	0.0761881	0.240199	0.414161	0.0646492	0.710692	0.0167572	-0.0282935	0.0618079	0.465981	0.999527	C	T
rs35654957	0.0203695	-0.0137157	0.0544547	0.241484	0	0.28329	0.710692	0.0178176	-0.0313353	0.0669705	0.477411	0.999527	T	C
rs6070625	0.0208465	-0.0140382	0.0557313	0.241502	0	0.214909	0.710692	0.0489625	0.00546672	0.0924583	0.027363	0.744201	C	G
rs5213	0.0215651	-0.0145378	0.057668	0.241707	0.113738	0.13304	0.710692	0.0180086	-0.0481732	0.0841904	0.59381	0.999527	C	T
rs7987740	-0.0200172	-0.0540224	0.013988	0.248608	0	0.774534	0.725567	0.00200213	-0.0404607	0.0444649	0.92637	0.999527	T	C
rs56348580	0.0198298	-0.014627	0.0542866	0.25934	0.130904	0.129271	0.733082	0.0105011	-0.0430827	0.064085	0.7009	0.999527	G	C
rs10908278	0.0259264	-0.019197	0.0710498	0.260111	0.400251	0.0678317	0.733082	0.00217977	-0.0413575	0.045717	0.92183	0.999527	T	A
rs78020297	-0.00846172	-0.0232332	0.00630973	0.261543	0	0.611313	0.733082	-0.00333499	-0.0219545	0.0152845	0.725548	0.999527	G	A
rs73226260	0.00692566	-0.00517856	0.0190299	0.262105	0	0.172768	0.733082	0.00516605	-0.0107201	0.0210522	0.523887	0.999527	G	A
rs10406431	-0.0196824	-0.0542784	0.0149137	0.264824	0	0.646612	0.733082	-0.00995138	-0.053095	0.0331922	0.651211	0.999527	A	G
rs148766658	-0.00750689	-0.0207605	0.00574666	0.266941	0	0.77261	0.733082	-0.00732126	-0.023981	0.0093385	0.389061	0.999527	T	C
rs13262861	0.0141232	-0.0108936	0.03914	0.268513	0	0.271509	0.733082	-0.0111248	-0.042432	0.0201824	0.486142	0.999527	C	A
rs576406049	0.000939948	-0.00072801	0.00260791	0.269375	0.442439	0.0582316	0.733082	0.000785239	-0.00152774	0.00309822	0.505799	0.999527	C	T
rs543786825	-0.000548689	-0.0015234	0.000426023	0.269892	0	0.566413	0.733082	-0.000304373	-0.0015214	0.000912657	0.624009	0.999527	C	T
rs2028150	0.0189742	-0.0151191	0.0530675	0.275364	0	0.273862	0.733082	0.0449117	0.0023147	0.0875087	0.0387843	0.744201	C	G
rs2727301	0.0283328	-0.022705	0.0793707	0.276577	0.643942	0.0177865	0.733082	0.0396911	0.00179099	0.0775913	0.040113	0.744201	T	C
rs9563615	-0.0209787	-0.0587752	0.0168178	0.276654	0.278908	0.0958322	0.733082	-0.00501545	-0.0450547	0.0350238	0.80606	0.999527	A	T
rs1493694	-0.0226872	-0.0635859	0.0182116	0.276938	0.713543	0.00823401	0.733082	-0.0105494	-0.0378104	0.0167115	0.448171	0.999527	C	T
rs66477705	0.00603954	-0.00487745	0.0169565	0.278232	0.0086353	0.155503	0.733082	0.0148328	0.00157711	0.0280884	0.0282963	0.744201	T	C
rs558308082	0.000682762	-0.000553599	0.00191912	0.279092	0.253083	0.101764	0.733082	0.00154759	0.000227591	0.00286759	0.0215676	0.744201	G	C
rs8107974	0.010466	-0.00859967	0.0295316	0.281967	0	0.384184	0.735729	0.00817282	-0.0155562	0.0319019	0.499641	0.999527	A	T
rs878521	-0.0292623	-0.0828149	0.0242903	0.284184	0.676464	0.0129078	0.736634	-0.00463903	-0.0651779	0.0558998	0.880615	0.999527	G	A
rs35497231	-0.0193248	-0.0553256	0.016676	0.29276	0.15461	0.124023	0.753906	-0.0407717	-0.0821732	0.000629867	0.0535888	0.902432	C	T
rs2237895	-0.021748	-0.0627138	0.0192179	0.298105	0.265946	0.0988132	0.760528	0.0114807	-0.0724573	0.0954186	0.788641	0.999527	A	C
rs12719778	0.0182701	-0.0163193	0.0528595	0.300551	0	0.564879	0.760528	-0.00624041	-0.0509697	0.0384889	0.784512	0.999527	T	C
rs199795270	-0.00294567	-0.00854065	0.00264931	0.302124	0.266219	0.0987504	0.760528	-0.00315546	-0.00781647	0.00150556	0.18455	0.982551	G	C
rs4709746	-0.0121582	-0.0355424	0.011226	0.308179	0	0.884141	0.760528	-0.000924427	-0.0301386	0.0282897	0.950547	0.999527	C	T
rs111827885	-0.00303845	-0.0089039	0.002827	0.309958	0	0.477918	0.760528	-0.000927878	-0.00810632	0.00625056	0.800003	0.999527	T	C
rs34584161	0.0149572	-0.0139534	0.0438677	0.31058	0	0.62814	0.760528	0.0340867	-0.00200307	0.0701765	0.0641435	0.902432	A	G
rs445084	0.0177123	-0.016603	0.0520275	0.3117	0	0.45547	0.760528	0.0258394	-0.0169731	0.068652	0.236835	0.982551	A	G
rs145678014	-0.00716725	-0.0211211	0.00678663	0.314073	0	0.679411	0.760528	-0.00271933	-0.0199185	0.0144798	0.756647	0.999527	G	T
rs2258238	-0.019565	-0.0576597	0.0185298	0.314122	0.676721	0.0128721	0.760528	-0.0140721	-0.0462829	0.0181388	0.391856	0.999527	A	T
rs187936726	-0.00483732	-0.014287	0.00461233	0.315709	0	0.446237	0.760528	-0.00951432	-0.0214152	0.00238658	0.117134	0.942702	A	G
rs7867635	-0.0171751	-0.0508863	0.0165361	0.318009	0	0.473394	0.760528	-0.0219219	-0.0638002	0.0199563	0.304902	0.982551	T	C
rs62357230	0.00609946	-0.00589525	0.0180942	0.318926	0	0.423314	0.760528	0.00818266	-0.00668739	0.0230527	0.2808	0.982551	G	A
rs4771648	-0.0197972	-0.0589043	0.0193099	0.321102	0.288482	0.0936263	0.760528	-0.0189694	-0.102666	0.0647272	0.656886	0.999527	G	A
rs1561927	0.0153169	-0.0151711	0.0458048	0.324788	0	0.346296	0.760528	-0.0194081	-0.0658661	0.0270499	0.412908	0.999527	C	T
rs576674	0.0187574	-0.0186233	0.056138	0.325363	0.516021	0.0420694	0.760528	0.00470601	-0.027521	0.036933	0.774719	0.999527	G	A
rs4923543	-0.0163833	-0.0490905	0.0163239	0.326216	0	0.258876	0.760528	-0.00988686	-0.0506565	0.0308827	0.634571	0.999527	G	A
rs1562396	-0.0156903	-0.0472853	0.0159046	0.330386	0	0.515567	0.765719	-0.0169145	-0.0563309	0.0225019	0.40031	0.999527	A	G
rs2456530	-0.0157252	-0.0476845	0.0162341	0.334858	0.442983	0.0581088	0.771544	-0.00998138	-0.055719	0.0357563	0.668851	0.999527	C	T
rs79687284	-0.00553959	-0.0168676	0.00578839	0.337832	0.0563079	0.14545	0.77387	-0.00152	-0.0278931	0.0248531	0.910061	0.999527	G	C
rs34298980	-0.0166299	-0.0510922	0.0178325	0.344258	0	0.20204	0.784034	-0.00522926	-0.0479485	0.03749	0.810393	0.999527	T	C
rs10195252	-0.0161554	-0.0501801	0.0178693	0.352052	0	0.442723	0.795071	-0.00209431	-0.0446087	0.0404201	0.923084	0.999527	T	C
rs116913033	0.018555	-0.0206746	0.0577846	0.35391	0.600143	0.0253211	0.795071	0.0233518	-0.0136862	0.0603899	0.216562	0.982551	C	T
rs1377807	-0.0157387	-0.0491004	0.0176231	0.355159	0.0695224	0.142622	0.795071	-0.016785	-0.082482	0.0489119	0.616543	0.999527	G	C
rs10974438	-0.0155295	-0.0486113	0.0175523	0.357541	0	0.372148	0.795495	-0.0199358	-0.0612349	0.0213633	0.344092	0.995671	A	C
rs62007683	-0.0167785	-0.0528059	0.019249	0.361357	0.150206	0.125001	0.795495	-0.013831	-0.0681775	0.0405156	0.617918	0.999527	G	T
rs1800961	0.00649636	-0.00745429	0.020447	0.361405	0.0602412	0.14461	0.795495	-0.00488955	-0.0218845	0.0121054	0.572828	0.999527	C	T
rs191830490	0.00199289	-0.00232807	0.00631385	0.366014	0	0.41417	0.801165	0.00295666	-0.00239752	0.00831083	0.27911	0.982551	G	A
rs61676547	0.0144983	-0.0172056	0.0462022	0.370094	0.181695	0.117969	0.805618	0.0074422	-0.0478954	0.0627799	0.792096	0.999527	G	C
rs2820446	-0.0144659	-0.0463109	0.0173791	0.373288	0	0.277969	0.807194	-0.0230748	-0.0627413	0.0165916	0.254222	0.982551	C	G
rs3772071	-0.0185628	-0.0595697	0.022444	0.374956	0.409658	0.065678	0.807194	0.00237414	-0.03995	0.0446982	0.912455	0.999527	C	T
rs35999103	-0.0114721	-0.0369219	0.0139776	0.376964	0	0.226043	0.807194	-0.0168153	-0.048576	0.0149453	0.299419	0.982551	C	T
rs12048743	-0.0207079	-0.0672029	0.0257871	0.382703	0.428406	0.0614064	0.815054	-1.95219e-05	-0.0644974	0.0644583	0.999527	0.999527	C	G
rs6821438	-0.0154667	-0.0504557	0.0195223	0.386275	0	0.523487	0.816857	-0.0205952	-0.0643431	0.0231526	0.356166	0.999527	A	G
rs60276348	-0.00970751	-0.0317338	0.0123188	0.387696	0	0.226943	0.816857	0.00261013	-0.0247097	0.02993	0.851461	0.999527	C	T
rs41277236	-0.00791742	-0.0261004	0.0102656	0.393422	0.541055	0.0368395	0.823274	-0.00731535	-0.0251516	0.0105209	0.42148	0.999527	C	T
rs702634	-0.0137791	-0.0455242	0.0179661	0.394921	0	0.354301	0.823274	-0.0423872	-0.0820014	-0.00277302	0.0359792	0.744201	G	A
rs9687832	-0.0119387	-0.0400194	0.016142	0.404681	0	0.570239	0.83244	-0.02348	-0.0586199	0.0116598	0.190323	0.982551	G	A
rs11696357	0.00594182	-0.00820544	0.0200891	0.410405	0	0.43878	0.83244	0.0029843	-0.0145029	0.0204715	0.738017	0.999527	A	G
rs12236906	0.00712555	-0.00990159	0.0241527	0.412097	0.829744	0.000609413	0.83244	0.00951843	-0.00324838	0.0222853	0.143941	0.982551	T	C
rs113414093	0.00497113	-0.00691915	0.0168614	0.412542	0	0.481576	0.83244	0.00308028	-0.0115909	0.0177514	0.680703	0.999527	G	A
rs11842871	0.0143485	-0.0200042	0.0487012	0.412992	0.224176	0.108365	0.83244	-0.000238025	-0.0420951	0.041619	0.991107	0.999527	G	T
rs138337556	-0.00128592	-0.00436999	0.00179815	0.413805	0.298849	0.0912347	0.83244	-0.000957547	-0.00411412	0.00219902	0.55214	0.999527	A	G
rs9379084	0.0134455	-0.0188223	0.0457133	0.414107	0.585371	0.0280729	0.83244	0.0138824	-0.0304549	0.0582197	0.539426	0.999527	G	A
rs78840640	-0.00425234	-0.014562	0.00605727	0.418852	0	0.171949	0.834944	-0.000302882	-0.0148991	0.0142934	0.967559	0.999527	C	G
rs12454712	0.0130197	-0.0187098	0.0447492	0.421258	0.0900043	0.138207	0.834944	0.0313115	-0.0202738	0.0828968	0.234177	0.982551	T	C
rs6063048	0.0206128	-0.0296703	0.0708958	0.42171	0.623796	0.0211273	0.834944	0.0304495	-0.0311603	0.0920592	0.332707	0.995671	G	A
rs1359790	0.0125177	-0.0183498	0.0433852	0.426716	0	0.285319	0.84063	-0.0279005	-0.0914753	0.0356743	0.389706	0.999527	G	A
rs718314	-0.0155578	-0.0542243	0.0231086	0.430339	0.390853	0.069989	0.84355	-0.0356044	-0.0894779	0.018269	0.19521	0.982551	A	G
rs72926932	-0.0115605	-0.0404892	0.0173682	0.433486	0.543074	0.0364255	0.845512	-0.0199866	-0.0609799	0.0210067	0.339277	0.995671	A	C
rs11680058	0.0074456	-0.0114016	0.0262928	0.438761	0	0.511963	0.847106	-0.000289275	-0.0236142	0.0230357	0.980607	0.999527	G	A
rs17791513	-0.00650275	-0.0230641	0.0100586	0.441553	0	0.574626	0.847106	-0.0190699	-0.0398999	0.00176006	0.0727566	0.907433	A	G
rs72631105	-0.0154518	-0.0548054	0.0239017	0.441559	0.531748	0.0387635	0.847106	-0.0162404	-0.0566345	0.0241537	0.430697	0.999527	G	A
rs12811407	0.0151341	-0.0235514	0.0538195	0.443227	0.244847	0.10365	0.847106	0.0219191	-0.0200007	0.063839	0.305444	0.982551	G	A
rs7719891	0.012087	-0.0189336	0.0431076	0.445053	0	0.260669	0.847106	0.00724137	-0.0475996	0.0620824	0.79579	0.999527	A	G
rs62482405	-0.00908992	-0.032678	0.0144981	0.450073	0.334381	0.0830222	0.852542	0.00302959	-0.0208494	0.0269086	0.803619	0.999527	T	G
rs7918400	0.0134746	-0.0217314	0.0486806	0.453166	0	0.180023	0.854123	0.0204024	-0.0452175	0.0860222	0.542267	0.999527	T	C
rs9957145	0.0127871	-0.0209064	0.0464805	0.456979	0.423972	0.0624137	0.854123	-0.00177394	-0.0537518	0.0502039	0.946668	0.999527	G	A
rs7756992	-0.017069	-0.0622225	0.0280845	0.458748	0.481533	0.0495234	0.854123	0.0138267	-0.0265835	0.0542369	0.502465	0.999527	A	G
rs2872246	-0.0155527	-0.0567712	0.0256658	0.459579	0.274603	0.096823	0.854123	-0.00249236	-0.046202	0.0412172	0.911015	0.999527	A	C
rs3217792	0.00905896	-0.0151345	0.0332524	0.463018	0.480024	0.049855	0.854944	-0.00182161	-0.0233655	0.0197223	0.868376	0.999527	C	T
rs28525376	-0.0215238	-0.079589	0.0365414	0.467516	0.648316	0.0170918	0.854944	-0.03666	-0.114406	0.0410863	0.355388	0.999527	G	T
rs3887925	-0.0128118	-0.0474676	0.0218441	0.468716	0	0.177575	0.854944	0.00376363	-0.039546	0.0470733	0.864757	0.999527	C	T
rs1061810	-0.0141857	-0.0525711	0.0241997	0.468867	0.315751	0.0873301	0.854944	-0.0414	-0.0809349	-0.00186503	0.0401285	0.744201	C	A
rs7645517	0.00552938	-0.00957269	0.0206314	0.472999	0	0.390159	0.854944	0.00533986	-0.0133216	0.0240013	0.574912	0.999527	G	A
rs329122	-0.0126037	-0.0470306	0.0218232	0.47304	0	0.375276	0.854944	-0.00350192	-0.0464283	0.0394244	0.872965	0.999527	G	A
rs523288	-0.0127193	-0.0479708	0.0225322	0.47945	0.271416	0.0975559	0.862573	-0.0218708	-0.0594249	0.0156833	0.253685	0.982551	A	T
rs80102379	0.00255955	-0.00457774	0.00969685	0.482133	0	0.373822	0.863192	-0.00216061	-0.0108715	0.00655023	0.626865	0.999527	G	T
rs80244329	0.00315908	-0.00569123	0.0120094	0.484176	0	0.375058	0.863192	0.00333479	-0.00776355	0.0144331	0.555913	0.999527	G	A
rs2800733	0.0109949	-0.0200973	0.0420871	0.488253	0	0.344203	0.866409	-0.0337406	-0.0724211	0.00493993	0.0873297	0.928566	A	G
rs1296328	0.0122466	-0.022555	0.0470483	0.490379	0	0.182392	0.866409	0.00935524	-0.0339933	0.0527038	0.672304	0.999527	A	C
rs76197067	-1.93573e-05	-7.49943e-05	3.62797e-05	0.495293	0	0.262989	0.868847	-3.26757e-05	-9.40613e-05	2.87099e-05	0.296813	0.982551	A	G
rs528122639	-0.000434702	-0.00168667	0.000817263	0.496169	0	0.764838	0.868847	-2.12921e-06	-0.00244777	0.00244352	0.998639	0.999527	G	A
rs11688682	-0.0109971	-0.0430386	0.0210443	0.501145	0.142049	0.126809	0.87062	-0.0177078	-0.0542593	0.0188438	0.342354	0.995671	G	C
rs9537803	-0.01097	-0.0429666	0.0210266	0.501601	0	0.756128	0.87062	-0.00959102	-0.0496444	0.0304624	0.638838	0.999527	C	T
rs180988137	-0.00345306	-0.0135949	0.0066888	0.504567	0.51156	0.0430186	0.871928	-0.000650308	-0.00938911	0.00808849	0.884037	0.999527	A	G
rs825452	-0.0171411	-0.0687176	0.0344353	0.514799	0.554089	0.0341896	0.876897	-0.0270508	-0.0699692	0.0158677	0.216707	0.982551	G	A
rs96844	0.0126202	-0.0253916	0.050632	0.515225	0.329243	0.0842105	0.876897	0.00842193	-0.030299	0.0471428	0.66989	0.999527	G	A
rs231349	-0.00857081	-0.0344907	0.0173491	0.516926	0.480941	0.0496533	0.876897	-0.0166363	-0.0458201	0.0125476	0.263875	0.982551	C	T
rs231361	-0.0212056	-0.0854654	0.0430542	0.517772	0.783442	0.00237379	0.876897	-0.0106973	-0.0476937	0.0262991	0.570909	0.999527	G	A
rs11070332	0.0108659	-0.0224863	0.0442181	0.523121	0	0.312868	0.876897	0.00532818	-0.0364027	0.0470591	0.802396	0.999527	G	A
rs862016	0.00564764	-0.0117021	0.0229974	0.523473	0	0.599393	0.876897	0.0173297	-0.00426105	0.0389204	0.115683	0.942702	G	A
rs12910825	-0.010719	-0.0437459	0.0223079	0.524704	0	0.285236	0.876897	0.0380541	-0.0604461	0.136554	0.448928	0.999527	A	G
rs11688931	0.00893838	-0.0186384	0.0365152	0.525248	0.198235	0.114245	0.876897	0.00709499	-0.041637	0.055827	0.775372	0.999527	C	G
rs35895680	-0.0154211	-0.0635885	0.0327463	0.530336	0.541303	0.0367884	0.881655	0.00378411	-0.0713213	0.0788895	0.921336	0.999527	C	A
rs4688760	-0.0127427	-0.0533787	0.0278932	0.538812	0.343745	0.0808569	0.88564	-0.00319246	-0.0441371	0.0377522	0.878541	0.999527	C	T
rs2283164	0.00452073	-0.00995818	0.0189996	0.540566	0	0.474028	0.88564	0.0105177	-0.00798654	0.029022	0.265265	0.982551	A	G
rs6600191	0.00820424	-0.0181797	0.0345882	0.542218	0	0.298131	0.88564	0.0118449	-0.0210123	0.0447021	0.479842	0.999527	T	C
rs74368513	-0.00124151	-0.0052429	0.00275987	0.543108	0.563643	0.032283	0.88564	-0.00180661	-0.00508358	0.00147037	0.279904	0.982551	G	A
rs34715063	-0.0105312	-0.044546	0.0234836	0.543972	0.555876	0.0338306	0.88564	-0.0216518	-0.0495853	0.0062817	0.12871	0.982551	T	C
rs7629630	0.00876519	-0.0197901	0.0373204	0.547426	0.236034	0.105663	0.887597	0.0138503	-0.0172631	0.0449637	0.382941	0.999527	A	T
rs2268078	0.0149268	-0.0342568	0.0641103	0.551956	0.549958	0.0350234	0.891273	0.0390305	-0.00202948	0.0800906	0.0624498	0.902432	G	A
rs6708643	0.0104511	-0.0245109	0.0454131	0.557951	0	0.22953	0.897277	0.0167228	-0.0569604	0.090406	0.656447	0.999527	G	A
rs549498088	0.000916049	-0.00217394	0.00400604	0.56121	0.552138	0.0345827	0.898848	-0.000412017	-0.00263298	0.00180894	0.716158	0.999527	C	T
rs1333052	0.0141722	-0.0339667	0.062311	0.563928	0.536986	0.0376776	0.899546	0.0295285	-0.0112006	0.0702577	0.155326	0.982551	A	C
rs12920022	0.00998996	-0.0244765	0.0444565	0.569976	0.450369	0.0564474	0.902085	-0.00753787	-0.0521198	0.037044	0.74035	0.999527	T	A
rs2102278	-0.0154684	-0.0688531	0.0379164	0.5701	0.621998	0.0214361	0.902085	-0.0126607	-0.065052	0.0397307	0.635759	0.999527	A	G
rs2233632	-0.0090767	-0.0412171	0.0230637	0.579915	0	0.328548	0.913946	-0.0217947	-0.0620145	0.018425	0.288196	0.982551	C	T
rs3751837	-0.00798837	-0.0370474	0.0210707	0.590027	0	0.60559	0.921348	-0.00218913	-0.0384582	0.0340799	0.90583	0.999527	C	T
rs616279	-0.00844785	-0.0393042	0.0224085	0.591545	0	0.158448	0.921348	-0.0105319	-0.0603924	0.0393287	0.678876	0.999527	G	A
rs10757283	-0.0164993	-0.0767775	0.0437789	0.591627	0.670655	0.0137291	0.921348	-0.00487222	-0.0478505	0.038106	0.824165	0.999527	C	T
rs2268382	-0.0131768	-0.0621137	0.0357601	0.597678	0.537425	0.0375868	0.924253	-0.0152967	-0.0567229	0.0261296	0.469239	0.999527	A	C
rs1412234	0.021105	-0.0574907	0.0997007	0.598679	0.828296	0.000642744	0.924253	0.0155285	-0.0496969	0.0807538	0.640774	0.999527	T	C
rs2982521	-0.00907663	-0.0432836	0.0251303	0.603018	0	0.467957	0.924253	0.00405225	-0.0386788	0.0467833	0.852549	0.999527	A	T
rs2189301	0.00606389	-0.0168406	0.0289684	0.603834	0	0.424605	0.924253	0.00295341	-0.0256154	0.0315222	0.839433	0.999527	G	A
rs4929965	0.00920412	-0.0258675	0.0442757	0.606994	0	0.381735	0.924253	-0.00528324	-0.048742	0.0381756	0.811671	0.999527	A	G
rs10305745	-0.0013284	-0.00646624	0.00380944	0.612328	0.464329	0.0533272	0.924253	0.00162932	-0.0046242	0.00788284	0.609591	0.999527	G	A
rs17013314	-0.00285996	-0.0139248	0.00820491	0.612438	0	0.234579	0.924253	3.22593e-05	-0.0166311	0.0166956	0.996973	0.999527	A	G
rs117001013	0.00788895	-0.0227217	0.0384996	0.613475	0.634894	0.0192588	0.924253	-0.00135616	-0.0243666	0.0216543	0.908038	0.999527	C	T
rs75253922	-0.00783145	-0.0384685	0.0228056	0.616367	0.178126	0.11877	0.924253	-0.0234487	-0.0658891	0.0189917	0.278853	0.982551	T	C
rs77864822	-0.00421091	-0.0208749	0.012453	0.620406	0	0.333513	0.924253	-0.00536243	-0.0261144	0.0153895	0.612529	0.999527	A	G
rs2280141	0.00881001	-0.0261885	0.0438085	0.621749	0	0.321986	0.924253	-0.0149033	-0.0586213	0.0288146	0.504041	0.999527	T	G
rs34855922	-0.00753383	-0.0375032	0.0224356	0.622222	0	0.512428	0.924253	-0.0143396	-0.0514968	0.0228177	0.44942	0.999527	A	G
rs79103584	-0.00186609	-0.00932717	0.00559499	0.623988	0	0.254648	0.924253	-0.00068976	-0.0117316	0.0103521	0.902555	0.999527	T	A
rs12640250	-0.00760794	-0.0390282	0.0238123	0.635089	0	0.178337	0.934338	-0.00624666	-0.0558717	0.0433784	0.805129	0.999527	A	C
rs57327348	0.0099309	-0.0311377	0.0509995	0.63554	0.517948	0.0416609	0.934338	-0.00552205	-0.0640905	0.0530464	0.853392	0.999527	A	T
rs571342427	0.000391246	-0.00125658	0.00203907	0.641675	0	0.956073	0.935945	0.000341392	-0.00226951	0.00295229	0.797736	0.999527	T	C
rs17802463	0.00728674	-0.0234889	0.0380623	0.642604	0	0.366047	0.935945	0.0119584	-0.0265293	0.0504462	0.542541	0.999527	G	T
rs7124681	0.00791838	-0.0263682	0.042205	0.650803	0	0.471291	0.935945	0.0171879	-0.0255198	0.0598955	0.430231	0.999527	C	A
rs17819328	0.00793695	-0.0266611	0.042535	0.652981	0	0.761653	0.935945	-0.0142105	-0.0574476	0.0290266	0.519466	0.999527	T	G
rs61881115	-0.00549696	-0.0298038	0.0188099	0.65759	0	0.249917	0.935945	-0.00790036	-0.046141	0.0303403	0.685536	0.999527	G	A
rs7222481	0.00731673	-0.0254132	0.0400466	0.661279	0	0.257446	0.935945	-0.00465408	-0.045399	0.0360908	0.822853	0.999527	G	C
rs3768321	0.00922451	-0.0321074	0.0505564	0.661801	0.504308	0.0445719	0.935945	0.00016247	-0.0754047	0.0757296	0.996638	0.999527	G	T
rs149364428	0.00115362	-0.00405343	0.00636068	0.664121	0	0.768944	0.935945	0.00279259	-0.00390345	0.00948863	0.413698	0.999527	G	A
rs7978610	-0.00724506	-0.0399497	0.0254596	0.66415	0	0.281193	0.935945	-0.00114571	-0.0420049	0.0397135	0.956172	0.999527	G	C
rs59944054	0.00665286	-0.0234659	0.0367716	0.665064	0	0.787962	0.935945	0.0130151	-0.0246364	0.0506666	0.498085	0.999527	G	A
rs10096633	-0.0049827	-0.0277629	0.0177975	0.668141	0	0.275496	0.935945	-0.00824913	-0.036805	0.0203068	0.571267	0.999527	C	T
rs56376556	0.00321249	-0.0115071	0.0179321	0.66883	0.0569307	0.145317	0.935945	0.00647417	-0.0250161	0.0379644	0.686982	0.999527	C	T
rs3774723	-0.00545947	-0.0305102	0.0195913	0.669272	0	0.223225	0.935945	-0.0110396	-0.0422609	0.0201817	0.488292	0.999527	G	A
rs17250977	-0.00319501	-0.0179549	0.0115649	0.671372	0.331041	0.0837947	0.935945	-0.00265163	-0.0183085	0.0130052	0.739937	0.999527	A	G
rs8010382	-0.00746889	-0.042351	0.0274133	0.674732	0	0.390638	0.935945	0.00311451	-0.0401816	0.0464106	0.887878	0.999527	A	G
rs505922	-0.00697123	-0.0396979	0.0257555	0.676313	0	0.561865	0.935945	-0.0101601	-0.0511481	0.0308278	0.627083	0.999527	T	C
rs8046545	0.00707393	-0.0262114	0.0403593	0.677016	0	0.467171	0.935945	0.0441229	-0.0214542	0.1097	0.187255	0.982551	G	A
rs429358	-0.00476725	-0.0276922	0.0181577	0.683586	0	0.425688	0.941723	0.00704767	-0.0218691	0.0359645	0.632873	0.999527	T	C
rs7178762	-0.00704979	-0.042043	0.0279434	0.692948	0	0.583427	0.942392	-0.00946898	-0.0531019	0.0341639	0.670588	0.999527	C	T
rs559138871	-0.000550332	-0.00329459	0.00219393	0.694283	0.200965	0.113628	0.942392	-0.00057472	-0.004276	0.00312656	0.760873	0.999527	C	T
rs4804833	-0.0111833	-0.067633	0.0452663	0.6978	0.627457	0.0205035	0.942392	-0.0209509	-0.0636881	0.0217862	0.336638	0.995671	A	G
rs11137820	-0.0101755	-0.0619772	0.0416262	0.700238	0.564387	0.0321359	0.942392	-0.0178386	-0.0834095	0.0477323	0.593889	0.999527	C	G
rs17522122	-0.00916866	-0.055858	0.0375206	0.700319	0.455979	0.0551902	0.942392	-0.026746	-0.0695113	0.0160194	0.220279	0.982551	G	T
rs963740	-0.00610477	-0.0373106	0.0251011	0.701404	0	0.521442	0.942392	-0.0299426	-0.072813	0.0129279	0.171023	0.982551	A	T
rs75423501	0.0061996	-0.0255206	0.0379198	0.701669	0.598716	0.0255827	0.942392	-0.0134274	-0.0704999	0.043645	0.644712	0.999527	A	G
rs9430095	0.00677356	-0.0281006	0.0416477	0.70344	0	0.510012	0.942392	0.0184659	-0.0250935	0.0620252	0.406043	0.999527	C	G
rs10893829	-0.00553234	-0.0342352	0.0231705	0.705598	0.285722	0.0942626	0.942392	-0.017504	-0.0476387	0.0126306	0.254925	0.982551	T	C
rs9494624	0.00607157	-0.026027	0.0381702	0.710835	0	0.556123	0.943555	-0.0276364	-0.0677184	0.0124455	0.17657	0.982551	A	G
rs74452128	0.00187008	-0.00803169	0.0117719	0.711259	0.113997	0.132983	0.943555	0.00208132	-0.0180357	0.0221983	0.839308	0.999527	C	A
rs3934712	0.00527249	-0.0232979	0.0338429	0.717577	0	0.333317	0.944809	-0.00751679	-0.0430848	0.0280512	0.67872	0.999527	T	C
rs34454109	0.00527215	-0.0233698	0.0339141	0.71827	0	0.560872	0.944809	0.0189223	-0.0166391	0.0544838	0.296994	0.982551	A	T
rs6885132	0.00372373	-0.0165911	0.0240386	0.719398	0	0.64163	0.944809	-0.00114596	-0.0266445	0.0243526	0.929809	0.999527	C	G
rs9873618	-0.0056954	-0.0373704	0.0259796	0.724526	0	0.171135	0.948383	0.0139277	-0.0255863	0.0534418	0.489666	0.999527	G	A
rs67254669	-0.000641841	-0.00427001	0.00298633	0.728797	0.446692	0.0572736	0.950814	0.000363346	-0.00299889	0.00372558	0.832258	0.999527	A	G
rs2767036	0.00551055	-0.0268286	0.0378497	0.738398	0	0.52233	0.958051	0.0094784	-0.0398709	0.0588277	0.706586	0.999527	C	A
rs862320	0.00569313	-0.0283711	0.0397573	0.743239	0	0.71769	0.958051	-0.0236984	-0.0662532	0.0188565	0.27506	0.982551	C	T
rs58432198	-0.00362186	-0.025418	0.0181742	0.744661	0.0330796	0.150377	0.958051	0.00387649	-0.0314794	0.0392323	0.829849	0.999527	C	T
rs34965774	0.00775577	-0.0392345	0.0547461	0.746322	0.727427	0.00675316	0.958051	-0.000161231	-0.0360179	0.0356955	0.992968	0.999527	G	A
rs114526150	0.00186229	-0.00942915	0.0131537	0.746502	0.227108	0.107698	0.958051	-0.00348149	-0.0157471	0.00878416	0.577994	0.999527	T	G
rs2283220	0.00547107	-0.0281338	0.0390759	0.749655	0.155138	0.123905	0.958679	0.00537261	-0.0509906	0.0617359	0.851797	0.999527	A	G
rs74653713	0.00204524	-0.0106325	0.014723	0.751858	0	0.522767	0.958679	-0.00624455	-0.0226552	0.010166	0.455786	0.999527	C	A
rs4279506	-0.00606533	-0.0446078	0.0324771	0.757752	0.231441	0.106711	0.963078	-0.0110501	-0.0736522	0.0515521	0.729374	0.999527	G	C
rs11496066	0.00585673	-0.0325062	0.0442197	0.764772	0.526148	0.039933	0.967097	-0.0150756	-0.059124	0.0289729	0.50235	0.999527	T	C
rs57235767	0.00585224	-0.0336717	0.0453762	0.771657	0.337521	0.0822961	0.967097	-0.00786082	-0.0478996	0.032178	0.700386	0.999527	C	T
rs2796441	0.00597632	-0.0348374	0.04679	0.774115	0.316012	0.0872697	0.967097	-0.0197362	-0.0622746	0.0228022	0.363167	0.999527	G	A
rs2465043	-0.00807972	-0.0643652	0.0482057	0.778441	0.642907	0.0179524	0.967097	0.00294591	-0.0389559	0.0448477	0.890402	0.999527	G	A
rs11042596	-0.00473331	-0.0377422	0.0282756	0.778673	0	0.253304	0.967097	-0.0223425	-0.0631488	0.0184639	0.283214	0.982551	T	G
rs9505097	-0.00531953	-0.0424602	0.0318211	0.778926	0.436644	0.0595399	0.967097	-0.0140665	-0.0487272	0.0205942	0.426368	0.999527	C	T
rs2272163	0.0103327	-0.0625633	0.0832287	0.781153	0.77702	0.00274538	0.967097	0.0140388	-0.0606704	0.088748	0.712648	0.999527	C	A
rs6518681	0.00259684	-0.015884	0.0210777	0.783005	0	0.636609	0.967097	0.0172935	-0.00575844	0.0403453	0.141465	0.982551	A	G
rs28819812	-0.00458304	-0.0376878	0.0285218	0.786131	0	0.19718	0.967924	0.00380475	-0.0393671	0.0469766	0.862862	0.999527	C	A
rs362307	-0.00241283	-0.0205932	0.0157675	0.794772	0	0.493336	0.975514	-0.00599358	-0.0284182	0.016431	0.600381	0.999527	C	T
rs2237897	0.00160078	-0.0111259	0.0143275	0.805275	0	0.37692	0.978991	-0.0130072	-0.0286702	0.00265589	0.103605	0.942702	C	T
rs649961	0.00414494	-0.0304685	0.0387584	0.814438	0	0.27514	0.978991	-0.00152068	-0.0446252	0.0415838	0.944874	0.999527	T	C
rs6976111	0.00846732	-0.0634018	0.0803364	0.817381	0.786189	0.00222491	0.978991	0.00172291	-0.0604186	0.0638644	0.956663	0.999527	C	A
rs11709077	-0.00267093	-0.0256842	0.0203423	0.820055	0	0.323168	0.978991	-0.00208308	-0.0308735	0.0267074	0.88723	0.999527	G	A
rs6459733	0.00373832	-0.0285365	0.0360132	0.82041	0	0.162599	0.978991	-0.0182728	-0.0584596	0.021914	0.372827	0.999527	G	C
rs150111048	-0.000500881	-0.00486853	0.00386677	0.822159	0.425534	0.0620588	0.978991	-8.72203e-05	-0.0034333	0.00325886	0.959254	0.999527	A	G
rs7078559	0.00414646	-0.032282	0.0405749	0.823463	0.110956	0.133648	0.978991	0.01844	-0.0243671	0.0612471	0.398505	0.999527	C	T
rs55653563	0.00329075	-0.0270764	0.0336579	0.831801	0	0.559979	0.978991	0.00414208	-0.0337554	0.0420396	0.830377	0.999527	A	C
rs291367	-0.00370141	-0.0391471	0.0317442	0.837831	0.0966119	0.136774	0.978991	-0.0260275	-0.0681059	0.0160508	0.225385	0.982551	G	A
rs77136196	-0.00144453	-0.0157432	0.0128541	0.84304	0	0.422387	0.978991	-0.00379476	-0.0215362	0.0139467	0.675054	0.999527	C	T
rs1580278	0.00563151	-0.0511481	0.0624111	0.845868	0.657166	0.0157218	0.978991	-0.00401032	-0.0546409	0.0466203	0.876629	0.999527	C	A
rs72802342	0.00310237	-0.0283813	0.0345861	0.846855	0.697907	0.0100813	0.978991	-0.0125857	-0.0372786	0.0121072	0.317807	0.987263	C	A
rs557027608	-8.71478e-05	-0.000988784	0.000814489	0.849748	0	0.306512	0.978991	-0.000105763	-0.00123103	0.0010195	0.853844	0.999527	G	A
rs8032939	0.00295208	-0.0276357	0.0335399	0.849968	0	0.305054	0.978991	0.0184608	-0.0196852	0.0566067	0.342862	0.995671	T	C
rs2972144	0.00535713	-0.0519528	0.0626671	0.854633	0.66634	0.0143536	0.978991	-0.0145211	-0.0703967	0.0413546	0.6105	0.999527	A	G
rs112595469	0.00122918	-0.0122694	0.0147277	0.85835	0.210983	0.111361	0.978991	0.0116024	-0.00346808	0.0266729	0.131317	0.982551	C	T
rs114447556	0.00161847	-0.0161868	0.0194238	0.8586	0	0.519153	0.978991	0.00096863	-0.0211778	0.0231151	0.931686	0.999527	C	T
rs2908334	0.00303773	-0.0306662	0.0367416	0.859782	0	0.812313	0.978991	-0.00445278	-0.0464782	0.0375726	0.835489	0.999527	C	T
rs11202627	0.00349931	-0.0362025	0.0432011	0.862847	0.583026	0.0285182	0.978991	-0.00524189	-0.0416126	0.0311288	0.777577	0.999527	C	T
rs3217860	-0.00251658	-0.0314899	0.0264567	0.864822	0	0.559389	0.978991	-0.0090241	-0.0450468	0.0269986	0.623431	0.999527	A	G
rs4238013	-0.00242892	-0.030624	0.0257662	0.865919	0	0.407198	0.978991	-0.0115885	-0.0467537	0.0235767	0.518347	0.999527	C	T
rs555759341	-0.000242499	-0.00315835	0.00267335	0.870517	0	0.441496	0.978991	0.00051738	-0.0032163	0.00425106	0.785934	0.999527	G	C
rs234853	-0.00466214	-0.0636078	0.0542835	0.876807	0.730859	0.00641076	0.978991	0.00953148	-0.0664913	0.0855542	0.805888	0.999527	G	A
rs3845281	-0.00158166	-0.0215954	0.0184321	0.876906	0	0.561221	0.978991	-0.00427745	-0.029289	0.0207341	0.737481	0.999527	G	A
rs13041756	-0.00170601	-0.0234928	0.0200807	0.878024	0	0.351223	0.978991	0.00355409	-0.0510908	0.058199	0.898564	0.999527	T	C
rs1127215	0.00430733	-0.051449	0.0600637	0.87965	0.620726	0.0216558	0.978991	0.00370157	-0.0507941	0.0581972	0.894091	0.999527	C	T
rs188247550	-0.000549366	-0.00771294	0.00661421	0.880522	0.225277	0.108115	0.978991	0.00186734	-0.00603061	0.00976528	0.643077	0.999527	C	T
rs4925109	0.003043	-0.0381719	0.0442579	0.884941	0.382665	0.0718725	0.978991	-0.00935114	-0.054259	0.0355567	0.683184	0.999527	A	G
rs4930091	0.00308422	-0.0391039	0.0452723	0.886064	0.505979	0.0442129	0.978991	0.00818721	-0.0327878	0.0491622	0.695339	0.999527	T	C
rs117483894	0.000934724	-0.0120869	0.0139563	0.888114	0	0.301631	0.978991	-0.0120255	-0.0281869	0.00413598	0.144737	0.982551	A	G
rs7943101	0.0018091	-0.0238261	0.0274443	0.88999	0	0.654224	0.978991	-0.0132962	-0.0454189	0.0188265	0.417213	0.999527	C	T
rs12680028	0.00434502	-0.0578523	0.0665423	0.891094	0.682403	0.0120923	0.978991	0.0207044	-0.0285666	0.0699754	0.410163	0.999527	C	G
rs73224262	-0.00038001	-0.00588962	0.0051296	0.892467	0	0.597655	0.978991	0.00105675	-0.00572599	0.0078395	0.76009	0.999527	C	T
rs4976033	-0.00501455	-0.0796753	0.0696462	0.895269	0.782608	0.00242019	0.978991	0.0149829	-0.0458053	0.0757711	0.629035	0.999527	A	G
rs1801645	-0.00209357	-0.0341703	0.0299831	0.89821	0	0.47414	0.978991	0.0124367	-0.0276378	0.0525111	0.54302	0.999527	C	T
rs62271373	-0.000978705	-0.0160791	0.0141217	0.898915	0	0.304518	0.978991	0.00394015	-0.0147336	0.0226139	0.679202	0.999527	T	A
rs145904381	-0.000861642	-0.0144247	0.0127014	0.900908	0.709826	0.00865622	0.978991	0.00345517	-0.0113901	0.0183004	0.648266	0.999527	T	C
rs1516728	0.0019468	-0.0289035	0.0327971	0.901567	0.076284	0.141169	0.978991	-0.0187963	-0.0724141	0.0348214	0.492027	0.999527	T	A
rs13024606	0.000846023	-0.0127569	0.014449	0.90298	0	0.158401	0.978991	0.000925972	-0.0204794	0.0223313	0.932432	0.999527	C	T
rs560716466	0.000136969	-0.00209249	0.00236643	0.904157	0	0.214296	0.978991	-0.000111052	-0.00429946	0.00407736	0.958555	0.999527	G	A
rs184509201	0.000735615	-0.0112933	0.0127645	0.904594	0.512275	0.0428662	0.978991	-0.00465615	-0.0190079	0.00969556	0.524858	0.999527	C	G
rs1641523	-0.00287785	-0.0505841	0.0448283	0.905882	0.471561	0.0517222	0.978991	-0.00438545	-0.070169	0.0613981	0.896044	0.999527	C	T
rs17836088	0.00175431	-0.0276583	0.0311669	0.906938	0	0.52643	0.978991	-0.0090456	-0.0456977	0.0276065	0.628591	0.999527	G	C
rs10938398	0.00391449	-0.0635208	0.0713498	0.909418	0.73788	0.00574022	0.978991	-0.0246845	-0.0821972	0.0328282	0.400225	0.999527	G	A
rs7022807	0.00301351	-0.054741	0.060768	0.918545	0.652102	0.0164998	0.983413	0.0190934	-0.0453536	0.0835404	0.561464	0.999527	A	G
rs3826482	-0.00178052	-0.0360205	0.0324594	0.91882	0	0.317735	0.983413	0.00282069	-0.0546647	0.0603061	0.923385	0.999527	A	T
rs510807	0.00166187	-0.0330524	0.0363761	0.925245	0	0.158176	0.983413	0.0114355	-0.045674	0.068545	0.694719	0.999527	C	A
rs4776970	0.00220567	-0.0440596	0.0484709	0.925554	0.460383	0.0542063	0.983413	0.00525981	-0.0586908	0.0692104	0.871933	0.999527	A	T
rs12578639	0.00125272	-0.0253731	0.0278785	0.926527	0	0.405215	0.983413	-0.0041057	-0.0374158	0.0292043	0.809106	0.999527	A	T
rs601945	-0.00220327	-0.05035	0.0459435	0.928533	0.696766	0.0102233	0.983413	-0.00947984	-0.0542398	0.0352801	0.678064	0.999527	A	G
rs28638142	-0.000627334	-0.0150649	0.0138102	0.932131	0	0.381222	0.983413	-0.00300128	-0.0210427	0.0150401	0.744386	0.999527	C	A
rs2925979	-0.00149049	-0.036497	0.0335161	0.933493	0.156387	0.123627	0.983413	0.0279435	-0.012165	0.068052	0.172096	0.982551	T	C
rs10406327	-0.00140961	-0.0375719	0.0347527	0.939101	0.0763913	0.141146	0.986044	-0.0178419	-0.0612052	0.0255214	0.419995	0.999527	C	G
rs3111316	0.00126534	-0.0329989	0.0355295	0.9423	0	0.321675	0.986044	-0.00253894	-0.0451859	0.040108	0.90711	0.999527	G	A
rs1531583	0.00108339	-0.0288772	0.0310439	0.943499	0.752984	0.00443472	0.986044	0.0219397	0.00150019	0.0423792	0.0353942	0.744201	G	T
rs4810426	-0.00108245	-0.037054	0.0348891	0.952969	0.632462	0.0196626	0.993306	0.017435	-0.0169792	0.0518491	0.320729	0.987263	C	T
rs4977213	-0.00140074	-0.0514816	0.0486801	0.956283	0.544678	0.0360974	0.99413	-0.00891048	-0.0509377	0.0331168	0.677743	0.999527	C	T
rs76549217	0.000332583	-0.0130789	0.013744	0.961235	0.378227	0.0728946	0.994398	0.000471521	-0.0127025	0.0136455	0.944074	0.999527	C	T
rs12140153	0.00050372	-0.0205082	0.0215157	0.962524	0.146827	0.125751	0.994398	0.000398889	-0.0239179	0.0247157	0.974352	0.999527	G	T
rs71372253	-0.000566278	-0.0252331	0.0241006	0.964111	0.61676	0.0223458	0.994398	-0.00483233	-0.0350596	0.0253949	0.754028	0.999527	T	C
rs1005752	-0.000671803	-0.0327137	0.0313701	0.967222	0.0351511	0.14994	0.995001	-0.0333199	-0.072562	0.00592213	0.0960764	0.933056	C	A
rs3115960	-0.00106938	-0.0648179	0.0626791	0.973772	0.720431	0.00748021	0.998416	0.00523024	-0.042583	0.0530435	0.830236	0.999527	G	C
rs11786992	-0.0003836	-0.0334216	0.0326544	0.981844	0	0.313675	0.998416	0.00655566	-0.034601	0.0477124	0.754893	0.999527	A	C
rs62080313	-0.000216728	-0.0228063	0.0223729	0.984997	0	0.750942	0.998416	0.00577424	-0.0225201	0.0340686	0.689168	0.999527	T	C
rs562386202	-2.00946e-05	-0.00253748	0.00249729	0.987518	0.669575	0.0138841	0.998416	0.000505174	-0.00126996	0.00228031	0.576999	0.999527	A	G
rs62492368	0.00025611	-0.0322396	0.0327518	0.987675	0	0.547828	0.998416	0.0226759	-0.0179231	0.0632749	0.273645	0.982551	G	A
rs76811102	-9.80218e-05	-0.0127328	0.0125368	0.987868	0	0.850893	0.998416	-0.00263536	-0.0183802	0.0131095	0.742868	0.999527	C	T
rs146886108	-1.91441e-05	-0.00374762	0.00370934	0.991971	0	0.527981	0.998416	-0.000128	-0.00463232	0.00437632	0.955584	0.999527	C	T
rs569511541	-2.48479e-07	-5.34384e-05	5.29414e-05	0.992695	0	0.413848	0.998416	1.7517e-05	-4.43838e-05	7.94178e-05	0.579141	0.999527	A	G
rs10469140	-0.000148209	-0.0349898	0.0346934	0.993348	0	0.600729	0.998416	0.0132066	-0.0302917	0.056705	0.551797	0.999527	A	G
rs536643418	-6.70572e-06	-0.00395458	0.00394117	0.997344	0.617051	0.0222948	0.999407	0.000524585	-0.00479048	0.00583965	0.846611	0.999527	C	G
rs6011155	-1.27041e-05	-0.0335299	0.0335045	0.999407	0	0.834326	0.999407	0.0178725	-0.0238887	0.0596338	0.401579	0.999527	T	C

## Sheet: MOD
MOD
Unadjusted model								Adjusted model
Variable	Effect	Lower	Upper	P-value	I2	Heterogeneity	P-value (FDR)	Effect	Lower	Upper	P-value	P-value (FDR)	REF	ALT
rs1421085	0.0633549	0.0331294	0.0935804	3.98691e-05	0	0.533677	0.0130476	-0.00624551	-0.0429717	0.0304807	0.738905	0.959342	T	C
rs10893829	0.043544	0.0221513	0.0649366	6.62315e-05	0	0.346792	0.0130476	0.0421827	0.0161599	0.0682054	0.00148762	0.151738	T	C
rs523288	0.0505546	0.0243675	0.0767418	0.000154495	0	0.227782	0.0202903	0.0268222	-0.0185347	0.0721791	0.24644	0.81921	A	T
rs8107974	-0.0395881	-0.0608356	-0.0183406	0.000260423	0.32283	0.0856935	0.0256516	-0.0400836	-0.061556	-0.0186113	0.000253428	0.0385546	A	T
rs77136196	-0.0203406	-0.0324967	-0.00818443	0.00103969	0	0.440627	0.0819277	-0.0209534	-0.0372484	-0.00465849	0.0117258	0.341724	C	T
rs2189301	0.0301839	0.0103728	0.0499949	0.00282489	0	0.175348	0.18101	0.0310446	0.00709484	0.0549944	0.0110669	0.341724	G	A
rs2465043	-0.0440011	-0.0732718	-0.0147304	0.00321591	0	0.508323	0.18101	-0.0269734	-0.0624332	0.00848638	0.135988	0.693541	G	A
rs10406327	0.0435815	0.0131784	0.0739846	0.00496155	0	0.508643	0.21973	0.0233023	-0.0135845	0.0601891	0.215657	0.81921	C	G
rs12140153	-0.0240936	-0.040924	-0.00726326	0.00501921	0	0.266972	0.21973	-0.014234	-0.0396869	0.011219	0.273052	0.81921	G	T
rs2581787	0.0424409	0.0118238	0.073058	0.00659023	0	0.584578	0.23631	0.0687988	0.0316513	0.105946	0.00028349	0.0385546	G	T
rs10954772	-0.0395303	-0.0680515	-0.0110091	0.00659749	0	0.249276	0.23631	-0.0192858	-0.053927	0.0153553	0.275196	0.81921	T	C
rs57235767	-0.0379252	-0.0661358	-0.00971457	0.00841635	0	0.22681	0.276337	-0.0389891	-0.0732451	-0.00473312	0.0256963	0.455593	C	T
rs35913461	-0.0280617	-0.0503775	-0.00574602	0.0137155	0	0.392515	0.39184	-0.0126814	-0.039853	0.0144902	0.360325	0.864993	C	T
rs11688931	-0.0271909	-0.0488615	-0.00552029	0.0139232	0	0.313437	0.39184	-0.0365323	-0.0628673	-0.0101972	0.00655035	0.242958	C	G
rs10750397	0.034181	0.00619089	0.0621712	0.0166898	0	0.375193	0.438385	0.0513018	0.00301348	0.0995901	0.0373171	0.475793	A	G
rs4776970	-0.034746	-0.064456	-0.00503598	0.0218949	0	0.485424	0.539161	-0.00682651	-0.0428788	0.0292258	0.710549	0.958221	A	T
rs616279	0.0309004	0.0040571	0.0577438	0.0240586	0	0.379759	0.54667	0.0312645	-0.00126001	0.063789	0.0595603	0.529645	G	A
rs145904381	-0.00682534	-0.0127926	-0.000858053	0.0249748	0	0.841534	0.54667	-0.00783151	-0.0150675	-0.000595486	0.0339001	0.461041	T	C
rs474513	0.0342913	0.00373438	0.0648483	0.027843	0	0.66816	0.577375	0.0227407	-0.014328	0.0598094	0.229213	0.81921	A	G
rs4932265	0.0295905	0.00242189	0.0567592	0.0327871	0	0.39646	0.628636	0.0321196	-0.000814911	0.0650541	0.0559445	0.528959	T	C
rs76197067	6.58487e-05	5.14172e-06	0.000126556	0.033506	0	0.568769	0.628636	7.81125e-05	-4.42403e-06	0.000160649	0.0636094	0.529645	A	G
rs9873618	-0.029458	-0.0571208	-0.00179518	0.036874	0	0.177987	0.660381	-0.0636661	-0.097207	-0.0301252	0.000198963	0.0385546	G	A
rs4946812	-0.0303443	-0.0593668	-0.00132177	0.04044	0	0.589278	0.666463	-0.0480988	-0.0988523	0.00265476	0.063248	0.529645	G	A
rs7124681	0.0312146	0.00133633	0.0610929	0.0405967	0	0.727448	0.666463	0.00176279	-0.0345406	0.0380662	0.92418	0.991081	C	A
rs2872246	-0.0313001	-0.0619864	-0.00061374	0.0455906	0	0.203243	0.69113	-0.0212185	-0.0584661	0.0160291	0.264201	0.81921	A	C
rs6070625	-0.0311577	-0.0617809	-0.000534417	0.0461337	0	0.446926	0.69113	-0.00123934	-0.0568669	0.0543882	0.96517	0.991081	C	G
rs10974438	0.0289995	0.000287802	0.0577111	0.0477473	0	0.378822	0.69113	0.0569926	0.0185979	0.0953872	0.00362184	0.207881	A	C
rs2197973	-0.030614	-0.0613884	0.000160418	0.0512062	0	0.43332	0.69113	-0.0109346	-0.0542379	0.0323686	0.620659	0.930989	C	T
rs116953931	0.0112665	-8.49667e-05	0.022618	0.0517397	0	0.2096	0.69113	0.00951012	-0.00893888	0.0279591	0.312339	0.845966	G	A
rs2283164	0.0122973	-0.000139417	0.0247341	0.0526241	0	0.863049	0.69113	0.0143461	-0.000711927	0.0294041	0.0618599	0.529645	A	G
rs2820446	0.0434339	-0.00134176	0.0882096	0.0572718	0.574433	0.0301695	0.727906	0.0289145	-0.0453034	0.103132	0.445117	0.886498	C	G
rs74653713	0.010605	-0.000708854	0.0219189	0.0661855	0	0.178583	0.790696	0.014011	-0.000136354	0.0281583	0.0522494	0.519945	C	A
rs177045	0.0418008	-0.00293879	0.0865405	0.0670676	0.549272	0.0351625	0.790696	0.049141	-0.00770045	0.105983	0.0901811	0.603974	A	G
rs187936726	-0.00821693	-0.017049	0.000615083	0.0682326	0	0.63207	0.790696	-0.00729086	-0.018175	0.0035933	0.189217	0.80417	A	G
rs1127215	-0.0325364	-0.0681933	0.00312047	0.0737051	0.250841	0.102278	0.829709	-0.0533249	-0.0916167	-0.0150331	0.00634438	0.242958	C	T
rs62370480	-0.0227938	-0.0485082	0.0029205	0.0823234	0	0.3319	0.894777	-0.0260536	-0.0572519	0.00514475	0.101681	0.603974	G	A
rs7022807	-0.0262744	-0.0560795	0.00353079	0.0840273	0	0.648544	0.894777	-0.0138067	-0.0500085	0.0223952	0.454767	0.886498	A	G
rs4929965	0.0266035	-0.00383541	0.0570425	0.0867122	0	0.268337	0.899068	0.0147663	-0.0221316	0.0516641	0.432826	0.886498	A	G
rs2727301	-0.0227968	-0.049308	0.00371439	0.091919	0	0.453802	0.904234	-0.020774	-0.0529131	0.011365	0.205198	0.81921	T	C
rs7943101	0.0186487	-0.00331589	0.0406133	0.096097	0	0.308447	0.904234	0.0146451	-0.0118539	0.0411442	0.278717	0.81921	C	T
rs34965774	-0.0180671	-0.0394703	0.00333611	0.0980331	0	0.195041	0.904234	-0.0226074	-0.0485867	0.00337189	0.0880867	0.603974	G	A
rs862016	-0.0127156	-0.0277921	0.00236085	0.0983207	0	0.388193	0.904234	-0.00455461	-0.023584	0.0144747	0.63899	0.948029	G	A
rs2800733	0.022693	-0.00429866	0.0496848	0.0993891	0	0.217005	0.904234	0.00195409	-0.0308088	0.0347169	0.90694	0.991081	A	G
rs1112718	0.0246915	-0.00491101	0.0542939	0.102089	0	0.266346	0.904234	0.000568245	-0.0354432	0.0365797	0.975327	0.991081	A	G
rs576406049	-0.000910065	-0.00200923	0.000189103	0.104639	0	0.337586	0.904234	-0.00114453	-0.00250614	0.000217078	0.0994569	0.603974	C	T
rs35497231	0.0256147	-0.00540546	0.0566349	0.10557	0.111182	0.133599	0.904234	0.0243887	-0.0184262	0.0672036	0.264227	0.81921	C	T
rs7629630	-0.0179213	-0.0398249	0.00398238	0.108799	0	0.624631	0.912058	-0.0268557	-0.0586555	0.00494407	0.0978762	0.603974	A	T
rs11496066	0.0187593	-0.00438691	0.0419056	0.112175	0	0.492125	0.917433	-0.00153387	-0.029651	0.0265833	0.914851	0.991081	T	C
rs13426680	-0.0123764	-0.0277535	0.00300067	0.114681	0	0.426879	0.917433	-0.0218906	-0.0405919	-0.00318937	0.0217777	0.455593	A	G
rs429358	-0.0165675	-0.0372994	0.00416448	0.117288	0.0422864	0.14843	0.917433	-0.00787862	-0.0324913	0.0167341	0.530402	0.9244	T	C
rs71372253	0.0102703	-0.00268782	0.0232283	0.120323	0	0.291382	0.917433	0.00698459	-0.00866029	0.0226295	0.381564	0.886498	T	C
rs62007683	-0.0223929	-0.0513397	0.00655385	0.129467	0	0.317929	0.917433	-0.0145752	-0.049655	0.0205045	0.415449	0.886498	G	T
rs12578639	0.0178849	-0.00540607	0.041176	0.132315	0	0.640993	0.917433	0.0109882	-0.0172491	0.0392256	0.445644	0.886498	A	T
rs569511541	3.54579e-05	-1.11536e-05	8.20694e-05	0.13597	0	0.158677	0.917433	4.07289e-05	-1.64696e-05	9.79274e-05	0.16283	0.772497	A	G
rs1043246	-0.0143634	-0.0333106	0.0045839	0.137334	0	0.223916	0.917433	-0.000615906	-0.0234104	0.0221786	0.957765	0.991081	C	G
rs2237897	0.0119884	-0.00407974	0.0280565	0.143653	0.479615	0.0499448	0.917433	-0.000339067	-0.0142428	0.0135647	0.961878	0.991081	C	T
rs61850200	-0.0198662	-0.0467373	0.00700488	0.147329	0	0.204041	0.917433	-0.0148908	-0.0474229	0.0176412	0.369649	0.874132	G	C
rs6821438	0.0226254	-0.00808938	0.0533402	0.148805	0	0.394068	0.917433	0.011221	-0.026062	0.048504	0.555266	0.9244	A	G
rs11137820	0.0226358	-0.00811064	0.0533822	0.149037	0.0457005	0.147706	0.917433	0.0641407	0.00104177	0.12724	0.0463356	0.497498	C	G
rs7847880	0.0254482	-0.00949861	0.060395	0.15351	0.567854	0.031453	0.917433	0.0275872	0.000860353	0.054314	0.0430673	0.497498	T	C
rs528350911	-0.00344336	-0.00818527	0.00129855	0.154667	0	0.740701	0.917433	-0.00247846	-0.00814892	0.00319199	0.391628	0.886498	C	G
rs7903146	-0.0409826	-0.0974614	0.0154962	0.154967	0.719708	0.00755761	0.917433	0.0659988	0.0229906	0.109007	0.00263243	0.179005	C	T
rs6458354	0.0337499	-0.0129284	0.0804282	0.156449	0.620727	0.0216556	0.917433	0.0414859	-0.0344184	0.11739	0.284066	0.81921	C	T
rs141521721	0.00622046	-0.00238324	0.0148242	0.156468	0	0.256322	0.917433	0.0140669	0.00363707	0.0244968	0.00820688	0.279034	C	A
rs10830963	0.0198521	-0.00766559	0.0473698	0.157369	0	0.232926	0.917433	0.0256267	-0.00782507	0.0590785	0.133229	0.693541	C	G
rs1800574	-0.00761584	-0.0181727	0.00294102	0.157379	0	0.281102	0.917433	-0.00706851	-0.0198555	0.00571853	0.278612	0.81921	C	T
rs114526150	-0.00634858	-0.015179	0.00248189	0.158806	0	0.16411	0.917433	-0.00844925	-0.0192285	0.00233003	0.124464	0.6595	T	G
rs28505901	-0.0396892	-0.0951661	0.0157876	0.160857	0.74306	0.00527135	0.917433	-0.0222042	-0.0904014	0.045993	0.523382	0.9244	A	G
rs10757283	-0.031745	-0.0762567	0.0127666	0.162168	0.501243	0.0452319	0.917433	-0.0292611	-0.0984945	0.0399722	0.407462	0.886498	C	T
rs199795270	0.00926171	-0.0037503	0.0222737	0.162996	0.875408	6.16133e-05	0.917433	0.00621686	-0.00598137	0.0184151	0.317843	0.847581	G	C
rs188247550	-0.00377885	-0.0091613	0.00160361	0.168813	0	0.472878	0.936795	-0.00229654	-0.00878322	0.00419013	0.487741	0.904538	C	T
rs12640250	0.0229087	-0.0101243	0.0559417	0.174067	0.265147	0.0989966	0.95176	0.0411311	0.00803793	0.0742242	0.0148501	0.397758	A	C
rs11926707	-0.0262224	-0.0642899	0.0118451	0.176984	0.363101	0.0763837	0.95176	-0.0208203	-0.0559072	0.0142667	0.244819	0.81921	T	C
rs6459733	0.0191486	-0.00891815	0.0472153	0.181161	0	0.582622	0.95176	0.0132279	-0.0207771	0.0472329	0.445808	0.886498	G	C
rs2052261	-0.0189929	-0.0468323	0.00884641	0.181173	0	0.893124	0.95176	-0.0183277	-0.0521504	0.015495	0.28821	0.81921	G	A
rs7178762	-0.0206561	-0.0513561	0.0100438	0.187256	0	0.88377	0.970775	-0.0345483	-0.0718028	0.00270617	0.0691265	0.532515	C	T
rs3798519	0.0245431	-0.0123089	0.0613952	0.191784	0.560699	0.0328671	0.981335	0.033197	-0.0211365	0.0875305	0.231107	0.81921	A	C
rs2642588	0.0244491	-0.0130026	0.0619008	0.200722	0.383901	0.0715878	0.987282	0.0380115	0.0020025	0.0740205	0.0385499	0.476617	T	G
rs9957145	0.0145037	-0.00777286	0.0367803	0.201926	0.00150686	0.156986	0.987282	0.0304458	0.00345491	0.0574367	0.0270466	0.455593	G	A
rs7867635	0.0188381	-0.0105889	0.0482651	0.209588	0	0.411998	0.987282	0.0395052	0.00380373	0.0752066	0.0300991	0.455593	T	C
rs291367	0.0185785	-0.0107635	0.0479204	0.214609	0	0.785648	0.987282	0.0165901	-0.018963	0.0521432	0.360414	0.864993	G	A
rs17689007	-0.0190152	-0.0493002	0.0112697	0.218467	0	0.239887	0.987282	-0.0117077	-0.0484797	0.0250643	0.53261	0.9244	G	A
rs61881115	0.0182972	-0.0109552	0.0475495	0.220219	0.427666	0.0615743	0.987282	0.0159931	-0.0262654	0.0582515	0.458229	0.886498	G	A
rs7249758	-0.0152311	-0.0399314	0.00946926	0.226824	0	0.532276	0.987282	-0.0234735	-0.0613187	0.0143717	0.22411	0.81921	G	A
rs34855922	-0.0158767	-0.0416439	0.00989057	0.227183	0	0.407977	0.987282	-0.0258978	-0.0570477	0.00525206	0.103207	0.603974	A	G
rs9569864	-0.0145102	-0.038104	0.0090836	0.228057	0	0.39506	0.987282	-0.00522583	-0.033827	0.0233753	0.720259	0.958337	C	T
rs62482405	0.0193717	-0.0121889	0.0509323	0.228971	0.683812	0.0119023	0.987282	0.0283796	0.000774279	0.0559849	0.0439112	0.497498	T	G
rs549498088	-0.001042	-0.00277108	0.000687068	0.237544	0	0.828231	0.987282	-0.00042747	-0.00259333	0.00173839	0.69888	0.958221	C	T
rs10848958	0.0123309	-0.00830572	0.0329675	0.241548	0	0.528338	0.987282	0.00813546	-0.0166564	0.0329274	0.520119	0.9244	C	T
rs2767036	0.027298	-0.0183926	0.0729886	0.241604	0.578133	0.0294548	0.987282	0.00479543	-0.0373563	0.0469472	0.823553	0.962075	C	A
rs9563615	-0.0166436	-0.0446026	0.0113154	0.243316	0	0.662481	0.987282	-0.00492648	-0.0388236	0.0289707	0.775756	0.959342	A	T
rs56348580	-0.0166725	-0.0446864	0.0113413	0.24342	0	0.764131	0.987282	-0.037935	-0.0718911	-0.00397885	0.0285514	0.455593	G	C
rs4736819	-0.0179194	-0.0481332	0.0122944	0.245062	0	0.192503	0.987282	-0.0252034	-0.0618363	0.0114295	0.177512	0.798949	C	T
rs13041756	0.0148086	-0.0105052	0.0401224	0.251556	0.385875	0.0711337	0.987282	0.0091274	-0.0263413	0.0445961	0.614001	0.9244	T	C
rs17684074	0.0305286	-0.0219917	0.0830488	0.25459	0.705078	0.009211	0.987282	0.0311416	-0.00195891	0.0642421	0.0651872	0.531927	G	C
rs2102278	0.0165242	-0.0119712	0.0450196	0.255722	0	0.173647	0.987282	0.0255265	-0.0139876	0.0650407	0.205457	0.81921	A	G
rs576674	0.0131722	-0.00959376	0.0359381	0.256787	0	0.223574	0.987282	-0.00435233	-0.0320552	0.0233506	0.75814	0.959342	G	A
rs56376556	0.0100532	-0.00757756	0.0276841	0.263742	0.455409	0.0553179	0.987282	0.00931972	-0.0167205	0.03536	0.483013	0.89986	C	T
rs3887925	-0.0171781	-0.0475905	0.0132343	0.268267	0.00137491	0.157014	0.987282	0.00736105	-0.0316655	0.0463877	0.71162	0.958221	C	T
rs4709746	0.0136404	-0.010536	0.0378168	0.268806	0.243953	0.103854	0.987282	0.00408306	-0.0206925	0.0288586	0.746691	0.959342	C	T
rs79103584	0.00373399	-0.00290542	0.0103734	0.27034	0	0.227057	0.987282	0.0011298	-0.0091036	0.0113632	0.828687	0.962075	T	A
rs11657492	-0.0160515	-0.0448803	0.0127773	0.275148	0.559535	0.033099	0.987282	-0.00585099	-0.0541932	0.0424912	0.812486	0.961325	T	G
rs17772814	-0.00767837	-0.0215827	0.00622597	0.279098	0	0.627096	0.987282	-0.0178924	-0.0346564	-0.00112827	0.0364497	0.475793	G	A
rs17836088	0.0208081	-0.0170307	0.0586469	0.281117	0.494456	0.0467008	0.987282	0.0193668	-0.0186298	0.0573635	0.317799	0.847581	G	C
rs112595469	-0.00547938	-0.0154664	0.00450762	0.282224	0	0.380359	0.987282	-0.000897432	-0.0128784	0.0110835	0.883281	0.991081	C	T
rs10305745	0.00184029	-0.00159815	0.00527872	0.294182	0	0.442683	0.987282	0.00473283	0.000454389	0.00901127	0.0301495	0.455593	G	A
rs56337234	0.0166713	-0.0149951	0.0483377	0.302139	0	0.217071	0.987282	-0.00439539	-0.0839622	0.0751714	0.91378	0.991081	C	T
rs35999103	0.0158104	-0.0143084	0.0459293	0.303549	0.407456	0.0661814	0.987282	-0.000425163	-0.027269	0.0264186	0.975236	0.991081	C	T
rs34298980	0.0153283	-0.0141387	0.0447953	0.307945	0	0.332417	0.987282	0.0440966	-0.00815798	0.0963512	0.0981327	0.603974	T	C
rs862320	-0.0155178	-0.045503	0.0144674	0.310435	0	0.409835	0.987282	-0.0170138	-0.0729492	0.0389217	0.551069	0.9244	C	T
rs2237895	-0.0154145	-0.0458166	0.0149876	0.320349	0	0.285007	0.987282	0.0281434	-0.00877051	0.0650573	0.1351	0.693541	A	C
rs62107261	-0.0106855	-0.0318812	0.0105101	0.323106	0.706209	0.00907728	0.987282	0.00791121	-0.00467904	0.0205015	0.218112	0.81921	T	C
rs9860730	0.0181411	-0.0182229	0.054505	0.328184	0.363576	0.076274	0.987282	0.0117023	-0.0804064	0.103811	0.803352	0.961325	A	G
rs58730668	0.0161323	-0.0162458	0.0485103	0.328795	0.553372	0.0343339	0.987282	-0.00526894	-0.0410807	0.0305428	0.773066	0.959342	T	C
rs6885132	-0.00869361	-0.0262282	0.00884094	0.331176	0	0.586012	0.987282	-0.0131435	-0.0343147	0.00802771	0.223687	0.81921	C	G
rs917195	0.0286419	-0.0291455	0.0864292	0.331329	0.804632	0.00137645	0.987282	0.0355675	-0.00745428	0.0785892	0.105154	0.603974	C	T
rs149364428	-0.00228957	-0.00694312	0.00236398	0.334889	0	0.257484	0.987282	-0.00309747	-0.00875218	0.00255723	0.282998	0.81921	G	A
rs2796441	-0.0145352	-0.0440894	0.0150191	0.335078	0	0.217527	0.987282	-0.0427953	-0.0787721	-0.00681853	0.0197308	0.447232	G	A
rs1333052	-0.0137321	-0.0421142	0.01465	0.342983	0	0.192938	0.987282	-0.00769011	-0.0600035	0.0446233	0.773258	0.959342	A	C
rs112498319	-0.0242454	-0.0746309	0.02614	0.345613	0.595273	0.0262177	0.987282	-0.0129486	-0.100781	0.0748839	0.772623	0.959342	C	A
rs35895680	-0.0136335	-0.0420226	0.0147556	0.346579	0	0.22267	0.987282	-0.012627	-0.0470917	0.0218377	0.472706	0.888774	C	A
rs4238013	0.0133595	-0.0144814	0.0412003	0.346965	0.17713	0.118993	0.987282	-0.000554944	-0.0331538	0.0320439	0.973383	0.991081	C	T
rs1801645	-0.0134348	-0.0414576	0.0145879	0.347394	0.00137843	0.157013	0.987282	-0.00995017	-0.0439008	0.0240005	0.565683	0.9244	C	T
rs28819812	0.0250639	-0.0275819	0.0777097	0.350763	0.664891	0.0145661	0.987282	-0.000677096	-0.0825453	0.0811911	0.987067	0.993737	C	A
rs649961	0.0212599	-0.0235794	0.0660992	0.35274	0.509528	0.0434526	0.987282	0.0207218	-0.0318735	0.0733172	0.439996	0.886498	T	C
rs10406431	-0.0142943	-0.04448	0.0158915	0.353341	0	0.802138	0.987282	-0.0204483	-0.0571273	0.0162306	0.274538	0.81921	A	G
rs78840640	-0.00449711	-0.0140812	0.00508699	0.357747	0.10634	0.134656	0.987282	-0.000838337	-0.0130412	0.0113645	0.892889	0.991081	C	G
rs4148856	-0.0116496	-0.0365475	0.0132482	0.35911	0	0.467055	0.987282	0.00696398	-0.0232642	0.0371921	0.651602	0.95053	G	C
rs2258238	0.0139863	-0.0160842	0.0440567	0.361974	0.564856	0.0320433	0.987282	0.0165956	-0.0284357	0.0616269	0.470101	0.887969	A	T
rs2982521	-0.0259583	-0.0817856	0.029869	0.362119	0.682185	0.0121218	0.987282	-0.0234538	-0.0812915	0.0343838	0.426737	0.886498	A	T
rs11642430	-0.0210197	-0.0663114	0.0242719	0.363027	0.519679	0.0412946	0.987282	-0.0567698	-0.134015	0.0204756	0.149745	0.72451	C	G
rs7115753	0.0165626	-0.0192231	0.0523484	0.36434	0.243295	0.104004	0.987282	0.00963155	-0.0603748	0.0796379	0.787426	0.961325	A	G
rs4281707	0.0141399	-0.0164166	0.0446964	0.364425	0	0.402778	0.987282	-0.0023723	-0.0473903	0.0426457	0.917738	0.991081	G	A
rs8037894	0.0139776	-0.0162876	0.0442428	0.365368	0	0.523643	0.987282	-0.00568585	-0.0423924	0.0310207	0.761434	0.959342	G	C
rs825452	-0.0138561	-0.0438623	0.0161501	0.365432	0	0.452969	0.987282	-0.00745815	-0.0438622	0.0289459	0.688022	0.958065	G	A
rs1575972	0.010113	-0.0118809	0.0321068	0.367478	0.772865	0.00300349	0.987282	0.00700945	-0.0182378	0.0322567	0.586339	0.9244	T	A
rs4977213	0.0135016	-0.016018	0.0430213	0.370016	0	0.439629	0.987282	-0.00349322	-0.0393169	0.0323305	0.848433	0.97741	C	T
rs9828772	0.00809578	-0.0096617	0.0258533	0.371555	0	0.358231	0.987282	0.00478084	-0.0166156	0.0261772	0.661432	0.95053	C	G
rs4457053	0.0124188	-0.0151551	0.0399926	0.37738	0	0.56768	0.987282	-0.0132773	-0.0467167	0.0201622	0.436444	0.886498	G	A
rs10228066	0.0136035	-0.0166954	0.0439024	0.378871	0	0.485787	0.987282	0.0445559	-0.00390354	0.0930153	0.0715323	0.532515	C	T
rs28638142	0.00588811	-0.00724233	0.0190185	0.37945	0.0467749	0.147478	0.987282	0.0134082	-0.00624475	0.0330611	0.181163	0.798949	C	A
rs8010382	-0.0135767	-0.0439244	0.016771	0.380577	0	0.167379	0.987282	-0.0239917	-0.0716872	0.0237037	0.324182	0.853331	A	G
rs286925	-0.0116589	-0.0377622	0.0144444	0.381354	0.147187	0.125671	0.987282	-0.022724	-0.0559377	0.0104896	0.179932	0.798949	A	G
rs1783541	-0.0111407	-0.0362272	0.0139458	0.384081	0	0.268968	0.987282	-0.0169936	-0.0473601	0.0133729	0.272717	0.81921	C	T
rs73226260	-0.00472678	-0.0153726	0.00591909	0.384177	0	0.283044	0.987282	-0.00717435	-0.0201228	0.00577411	0.277498	0.81921	G	A
rs3772071	0.0121653	-0.0152848	0.0396154	0.385057	0	0.434029	0.987282	0.0342874	0.00101488	0.06756	0.0434097	0.497498	C	T
rs34715063	-0.00838825	-0.0273248	0.0105483	0.385286	0	0.359337	0.987282	-0.000466132	-0.0232585	0.0223262	0.968026	0.991081	T	C
rs180988137	-0.00250676	-0.00820992	0.0031964	0.388974	0	0.469793	0.987282	-0.00178802	-0.0085972	0.00502115	0.606785	0.9244	A	G
rs2238689	-0.013434	-0.0441579	0.0172898	0.391448	0	0.50667	0.987282	0.0142816	-0.023	0.0515632	0.452766	0.886498	T	C
rs76549217	-0.00607127	-0.0199783	0.00783571	0.392193	0.506197	0.0441662	0.987282	-0.0105614	-0.0265051	0.0053822	0.194176	0.816738	C	T
rs6884702	0.0168707	-0.0231329	0.0568742	0.408478	0.387839	0.0706819	0.987282	0.0501381	0.00822523	0.092051	0.0190476	0.447232	A	G
rs2249105	0.0122956	-0.016896	0.0414872	0.409063	0	0.438887	0.987282	0.0132515	-0.0222354	0.0487384	0.464238	0.887969	A	G
rs7756992	-0.0157237	-0.0531789	0.0217314	0.410623	0.388539	0.0705209	0.987282	0.0332319	-0.0193528	0.0858166	0.215479	0.81921	A	G
rs7978610	0.011985	-0.0166187	0.0405887	0.411515	0	0.419027	0.987282	-0.0100167	-0.044709	0.0246755	0.57146	0.9244	G	C
rs6780171	0.0120175	-0.0167693	0.0408042	0.413234	0	0.45722	0.987282	0.0494631	0.0145758	0.0843505	0.00545556	0.242958	T	A
rs67254669	-0.000961789	-0.00328283	0.00135925	0.416696	0.018607	0.153419	0.987282	-0.00054108	-0.00372424	0.00264208	0.739015	0.959342	A	G
rs234853	-0.0110082	-0.0376172	0.0156009	0.41746	0	0.167677	0.987282	0.00784121	-0.0244085	0.0400909	0.633685	0.943589	G	A
rs1359790	-0.0109704	-0.0378218	0.0158809	0.423268	0	0.613743	0.987282	-0.0401938	-0.0727714	-0.00761624	0.0155984	0.397758	G	A
rs113414093	-0.00432202	-0.0149048	0.0062608	0.423451	0	0.256917	0.987282	-0.00395024	-0.0219951	0.0140946	0.667879	0.95053	G	A
rs1641523	0.0123267	-0.0178826	0.0425361	0.423856	0	0.730196	0.987282	0.00853634	-0.0281222	0.0451949	0.648103	0.95053	C	T
rs78020297	0.00533717	-0.0077602	0.0184345	0.424473	0.0496466	0.146868	0.987282	0.000666292	-0.0146096	0.0159421	0.931873	0.991081	G	A
rs34584161	-0.0103724	-0.0358739	0.015129	0.425338	0	0.226339	0.987282	-0.0117668	-0.0427755	0.0192418	0.457029	0.886498	A	G
rs1061810	0.0125687	-0.0184168	0.0435542	0.4266	0.165143	0.121675	0.987282	0.00925235	-0.0244003	0.042905	0.58998	0.9244	C	A
rs17122772	-0.0232553	-0.0808465	0.0343359	0.428691	0.785632	0.00225461	0.987282	-0.0185706	-0.105603	0.068462	0.675795	0.95053	C	G
rs11042596	-0.0148809	-0.0520106	0.0222487	0.432148	0.351604	0.0790398	0.987282	-0.0227668	-0.0771331	0.0315996	0.41178	0.886498	T	G
rs74452128	-0.00461218	-0.0163265	0.00710213	0.440304	0.472434	0.0515289	0.987282	-0.00474257	-0.0206419	0.0111568	0.558796	0.9244	C	A
rs11257655	-0.0104114	-0.0369529	0.0161301	0.441994	0.0727538	0.141929	0.987282	0.00597792	-0.0253391	0.0372949	0.708311	0.958221	C	T
rs3802177	0.0107634	-0.0167369	0.0382637	0.443013	0	0.398833	0.987282	-0.0228317	-0.0562861	0.0106228	0.181022	0.798949	G	A
rs7078559	-0.011989	-0.0427485	0.0187705	0.444912	0.0272895	0.151597	0.987282	-0.0102421	-0.0469964	0.0265121	0.584947	0.9244	C	T
rs11065299	-0.00623257	-0.0222236	0.00975845	0.444924	0	0.384685	0.987282	-0.0052795	-0.0246705	0.0141115	0.593598	0.9244	G	A
rs10962	-0.0112215	-0.0401704	0.0177275	0.44741	0.329964	0.0840437	0.987282	0.00173245	-0.0412266	0.0446915	0.937	0.991081	G	C
rs2066827	-0.00811869	-0.0291715	0.0129341	0.449751	0	0.464943	0.987282	0.0105506	-0.0147905	0.0358917	0.414488	0.886498	T	G
rs11786992	0.0110601	-0.01764	0.0397603	0.450065	0	0.375737	0.987282	0.00852506	-0.0390264	0.0560765	0.725301	0.959342	A	C
rs74368513	0.00137797	-0.00221947	0.00497542	0.452803	0.552377	0.0345345	0.987282	0.00311415	0.000302319	0.00592598	0.0299544	0.455593	G	A
rs2283220	-0.0140298	-0.050708	0.0226484	0.45343	0.4131	0.0648915	0.987282	-0.000218148	-0.0418914	0.0414551	0.991814	0.994251	A	G
rs11842871	-0.0181788	-0.0657187	0.029361	0.453572	0.657211	0.0157149	0.987282	0.00952482	-0.0774384	0.0964881	0.830026	0.962075	G	T
rs17791513	-0.00549487	-0.0200369	0.0090472	0.458941	0	0.443551	0.987282	-0.0110982	-0.0287783	0.00658194	0.218581	0.81921	A	G
rs2280141	0.0115539	-0.0190342	0.042142	0.459102	0	0.506235	0.987282	0.0207229	-0.0163671	0.0578129	0.273486	0.81921	T	G
rs8046545	-0.0220671	-0.0806818	0.0365475	0.460585	0.732137	0.0062857	0.987282	0.0203628	-0.0553871	0.0961128	0.598284	0.9244	G	A
rs72926932	-0.0064289	-0.0235471	0.0106893	0.461679	0	0.191839	0.987282	0.00109339	-0.0197178	0.0219046	0.917984	0.991081	A	C
rs244665	0.0216184	-0.03645	0.0796868	0.465586	0.749905	0.00468557	0.987282	0.0212303	-0.0425566	0.0850172	0.514182	0.9244	G	A
rs6708643	-0.0162124	-0.0598947	0.0274699	0.466963	0.466173	0.0529172	0.987282	0.0317532	-0.00521819	0.0687246	0.0923108	0.603974	G	A
rs279744	-0.0103681	-0.0388149	0.0180787	0.475007	0	0.255964	0.987282	-0.0207702	-0.0552243	0.0136839	0.237388	0.81921	C	A
rs11717959	0.0119721	-0.021026	0.0449701	0.477024	0.181883	0.117927	0.987282	0.0309335	-0.0149133	0.0767804	0.18603	0.798949	G	T
rs7669833	0.0196341	-0.0345063	0.0737745	0.477219	0.709307	0.00871597	0.987282	0.00518883	-0.0458768	0.0562545	0.842142	0.973354	T	A
rs1516728	0.0093577	-0.0165193	0.0352347	0.478469	0	0.634054	0.987282	-0.0013054	-0.0326858	0.030075	0.935018	0.991081	T	A
rs2233632	0.0100132	-0.0180785	0.0381049	0.484789	0	0.256761	0.987282	0.0134564	-0.020599	0.0475118	0.438667	0.886498	C	T
rs536643418	0.000902487	-0.0016373	0.00344227	0.486145	0.257955	0.100647	0.987282	-6.54777e-05	-0.00269596	0.00256501	0.961089	0.991081	C	G
rs13737	0.018167	-0.0329595	0.0692935	0.486152	0.722078	0.00730554	0.987282	0.0507934	-0.0163476	0.117934	0.138141	0.695823	G	T
rs738408	0.00910805	-0.0165327	0.0347488	0.486295	0	0.343939	0.987282	0.016922	-0.0141637	0.0480078	0.285999	0.81921	C	T
rs12920022	0.00854724	-0.0155258	0.0326202	0.486495	0.125442	0.130473	0.987282	-0.000718063	-0.0396773	0.0382412	0.971183	0.991081	T	A
rs150111048	0.00178595	-0.00324502	0.00681692	0.486574	0.620279	0.0217331	0.987282	0.00170915	-0.00391859	0.00733689	0.551682	0.9244	A	G
rs9505097	0.0113507	-0.0208501	0.0435514	0.48964	0.383557	0.0716671	0.987282	0.00842529	-0.0473546	0.0642052	0.767197	0.959342	C	T
rs17250977	0.00367197	-0.00676053	0.0141045	0.490284	0	0.481926	0.987282	0.00134826	-0.0126665	0.0153631	0.850442	0.97741	A	G
rs11699802	-0.0140263	-0.0539127	0.02586	0.490674	0.363385	0.0763182	0.987282	-0.0274256	-0.0645368	0.00968561	0.147495	0.72451	C	T
rs2431115	0.0103235	-0.0192515	0.0398985	0.49388	0	0.232868	0.987282	0.00762485	-0.0283633	0.043613	0.677951	0.95053	A	G
rs348330	0.00985418	-0.018396	0.0381043	0.494182	0	0.196836	0.987282	0.0029872	-0.0411001	0.0470745	0.894352	0.991081	G	A
rs4930091	-0.00898445	-0.0350807	0.0171118	0.499817	0	0.255619	0.987282	-0.00929981	-0.0410336	0.022434	0.56571	0.9244	T	C
rs6545714	-0.0102103	-0.0398802	0.0194596	0.500005	0	0.559435	0.987282	0.0293059	-0.00673382	0.0653456	0.110991	0.611949	G	A
rs12454712	0.0141005	-0.0272223	0.0554233	0.503626	0.543072	0.0364258	0.987282	-0.00425845	-0.0588412	0.0503243	0.878467	0.991081	T	C
rs11202627	-0.00736919	-0.0293185	0.0145801	0.510517	0	0.654135	0.987282	0.00940442	-0.0349415	0.0537503	0.677667	0.95053	C	T
rs73224262	-0.00163905	-0.00656404	0.00328594	0.514219	0	0.365632	0.987282	0.000548863	-0.00774045	0.00883818	0.896744	0.991081	C	T
rs1412830	0.00949634	-0.0194337	0.0384264	0.519989	0	0.248586	0.987282	-0.00954962	-0.0454011	0.0263018	0.601623	0.9244	C	T
rs3845281	-0.00726094	-0.0296783	0.0151564	0.52554	0.344488	0.080685	0.987282	-0.0113717	-0.0321935	0.00945012	0.28443	0.81921	G	A
rs17261179	0.00990516	-0.0207142	0.0405245	0.526057	0	0.829966	0.987282	-0.0046807	-0.0418682	0.0325068	0.805144	0.961325	T	C
rs555759341	-0.000714684	-0.00293244	0.00150307	0.527642	0	0.32662	0.987282	-0.00115223	-0.00375667	0.0014522	0.385881	0.886498	G	C
rs3111316	0.00963963	-0.0203003	0.0395796	0.528014	0	0.685748	0.987282	0.0117009	-0.0246417	0.0480435	0.528021	0.9244	G	A
rs4688760	0.00914631	-0.0195125	0.0378051	0.531634	0	0.717548	0.987282	-0.00434633	-0.0391272	0.0304345	0.806516	0.961325	C	T
rs702634	0.0129292	-0.0275972	0.0534557	0.531779	0.492572	0.0471103	0.987282	0.0321833	-0.0337098	0.0980764	0.338426	0.857626	G	A
rs1296328	0.0095076	-0.0209772	0.0399924	0.541019	0	0.684969	0.987282	0.0306388	-0.00638201	0.0676596	0.104785	0.603974	A	C
rs61676547	0.00779811	-0.0172834	0.0328796	0.542277	0	0.17057	0.987282	0.0150528	-0.0154194	0.045525	0.332949	0.857626	G	C
rs75253922	-0.00736872	-0.0314919	0.0167545	0.549377	0	0.35951	0.987282	-0.0102648	-0.0394574	0.0189277	0.490715	0.905935	T	C
rs62080313	-0.00742534	-0.0318191	0.0169685	0.550773	0.301181	0.0906964	0.987282	-0.00646619	-0.0366921	0.0237597	0.675002	0.95053	T	C
rs718314	0.00806401	-0.0184515	0.0345796	0.551127	0	0.249515	0.987282	0.0227108	-0.00959533	0.0550169	0.168256	0.782832	A	G
rs10882101	0.0109949	-0.025488	0.0474779	0.554736	0.295594	0.091986	0.987282	-0.0242399	-0.0671395	0.0186597	0.268098	0.81921	T	C
rs10096633	-0.00597918	-0.025862	0.0139037	0.555592	0	0.328578	0.987282	-0.0155208	-0.0564505	0.025409	0.457344	0.886498	C	T
rs11680058	-0.00482187	-0.0208705	0.0112267	0.555942	0	0.492278	0.987282	-0.0143572	-0.0461439	0.0174296	0.376017	0.881694	G	A
rs1531583	0.00391648	-0.00924011	0.0170731	0.559593	0	0.393095	0.987282	0.0112748	-0.00478587	0.0273355	0.168846	0.782832	G	T
rs1412234	0.0289291	-0.0688815	0.12674	0.562122	0.906683	3.66529e-06	0.987282	0.0176215	-0.104895	0.140138	0.77802	0.959342	T	C
rs4804833	0.012032	-0.0289824	0.0530465	0.565307	0.423497	0.0625218	0.987282	0.00867407	-0.068897	0.0862452	0.826521	0.962075	A	G
rs11820019	0.00262678	-0.00636295	0.0116165	0.566849	0	0.590545	0.987282	0.00654928	-0.00681081	0.0199094	0.336654	0.857626	T	C
rs12811407	-0.00853251	-0.037932	0.0208669	0.569468	0	0.301879	0.987282	-0.0118345	-0.047529	0.0238599	0.515803	0.9244	G	A
rs10097617	0.00880027	-0.0218101	0.0394107	0.573111	0	0.754993	0.987282	0.0216427	-0.0154522	0.0587376	0.252822	0.81921	T	C
rs57327348	-0.00709049	-0.0318202	0.0176392	0.574144	0	0.60696	0.987282	0.00975371	-0.0243086	0.043816	0.574639	0.9244	A	T
rs12048743	0.00877601	-0.0218969	0.0394489	0.574949	0	0.692617	0.987282	0.0207197	-0.0184431	0.0598826	0.299759	0.843459	C	G
rs72631105	0.00660613	-0.016686	0.0298983	0.578289	0	0.43357	0.987282	0.0275323	-0.000668765	0.0557333	0.055686	0.528959	G	A
rs3217860	-0.00702962	-0.0318945	0.0178352	0.579505	0	0.483761	0.987282	0.0026465	-0.0274243	0.0327173	0.863049	0.986341	A	G
rs8017808	0.00744606	-0.0190375	0.0339297	0.581594	0	0.681807	0.987282	0.0278195	-0.00436706	0.0600061	0.0902583	0.603974	G	T
rs77464186	0.00611764	-0.0158816	0.0281169	0.58573	0	0.263081	0.987282	-0.0273491	-0.0541344	-0.000563679	0.0453698	0.497498	A	C
rs76811102	0.00301685	-0.0078516	0.0138853	0.586411	0	0.280887	0.987282	-0.000915179	-0.0140434	0.012213	0.891322	0.991081	C	T
rs35352848	-0.0104498	-0.048983	0.0280834	0.595056	0.552769	0.0344555	0.987282	-0.0199605	-0.0891355	0.0492145	0.5717	0.9244	T	C
rs963740	0.0144479	-0.0389092	0.0678049	0.595617	0.709948	0.00864223	0.987282	0.00795319	-0.0452732	0.0611796	0.769628	0.959342	A	T
rs1317617	0.00660182	-0.0183034	0.031507	0.603382	0	0.491422	0.987282	0.00872487	-0.0215194	0.0389691	0.571795	0.9244	G	A
rs13024606	-0.00317333	-0.0151982	0.00885157	0.604997	0.0291795	0.151199	0.987282	-0.00446728	-0.0188021	0.00986755	0.541332	0.9244	C	T
rs5213	0.00805214	-0.0226806	0.0387849	0.607587	0.0544679	0.145842	0.987282	-0.0142197	-0.0503286	0.0218891	0.440211	0.886498	C	T
rs6011155	0.00758506	-0.0216765	0.0368466	0.611416	0	0.334356	0.987282	0.0173308	-0.0181256	0.0527872	0.338055	0.857626	T	C
rs557027608	0.000217583	-0.000624255	0.00105942	0.612453	0.130786	0.129297	0.987282	0.000662986	-0.000224419	0.00155039	0.143111	0.712066	G	A
rs6976111	0.0119382	-0.0345868	0.0584631	0.61502	0.573223	0.0304043	0.987282	0.0101644	-0.0577661	0.078095	0.769316	0.959342	C	A
rs11688682	-0.00649112	-0.0319511	0.0189689	0.617286	0	0.47029	0.987282	-0.0160325	-0.0469736	0.0149086	0.309829	0.845966	G	C
rs112915006	-0.00477544	-0.0235717	0.0140208	0.618516	0.497662	0.0460057	0.987282	0.00345256	-0.015503	0.0224081	0.721102	0.958337	A	G
rs75423501	-0.00523223	-0.0258895	0.015425	0.619587	0.246464	0.10328	0.987282	-0.0105324	-0.032401	0.0113363	0.345192	0.864039	A	G
rs11070332	-0.00731428	-0.0364421	0.0218136	0.622602	0	0.321855	0.987282	-0.0175321	-0.0528354	0.0177712	0.330382	0.857626	G	A
rs41277236	0.00260124	-0.00775904	0.0129615	0.622645	0	0.216698	0.987282	0.0069192	-0.0151296	0.0289679	0.538513	0.9244	C	T
rs67232546	-0.0115695	-0.0579494	0.0348104	0.624902	0.678832	0.0125798	0.987282	0.0139948	-0.0157862	0.0437757	0.357034	0.864993	C	T
rs1377807	-0.00703125	-0.0352287	0.0211662	0.625032	0	0.506153	0.987282	-0.00738693	-0.0416198	0.0268459	0.672346	0.95053	G	C
rs2908334	-0.00737594	-0.037008	0.0222561	0.625642	0.00869499	0.155491	0.987282	-0.0259888	-0.0706824	0.0187048	0.254413	0.81921	C	T
rs76263492	0.00337237	-0.0102169	0.0169616	0.626688	0.299125	0.091171	0.987282	0.00417261	-0.00898307	0.0173283	0.534175	0.9244	G	T
rs12910825	-0.00914104	-0.0464752	0.0281931	0.631309	0.360997	0.0768697	0.987282	0.00985425	-0.0329455	0.052654	0.651799	0.95053	A	G
rs28525376	0.0122974	-0.0380498	0.0626446	0.632134	0.607445	0.0239972	0.987282	0.0111925	-0.0588744	0.0812593	0.754217	0.959342	G	T
rs7987740	-0.00724621	-0.0369902	0.0224978	0.633017	0	0.502846	0.987282	-0.0148154	-0.0508841	0.0212532	0.420781	0.886498	T	C
rs539515	0.00793647	-0.0249273	0.0408002	0.635983	0.395263	0.068976	0.987282	-0.00169583	-0.0721309	0.0687393	0.962362	0.991081	A	C
rs1316776	0.0125498	-0.0401141	0.0652138	0.640456	0.669434	0.0139044	0.987282	0.0336673	-0.0190107	0.0863453	0.210335	0.81921	C	A
rs3751837	0.00725245	-0.0234831	0.037988	0.643738	0.274373	0.0968758	0.987282	-0.00339534	-0.0339596	0.0271689	0.82764	0.962075	C	T
rs191830490	-0.000836995	-0.00441595	0.00274196	0.646688	0	0.225615	0.987282	0.000503249	-0.00378624	0.00479274	0.818134	0.961956	G	A
rs2307111	-0.0127267	-0.0684506	0.0429972	0.654417	0.686227	0.0115802	0.987282	0.00215275	-0.0507365	0.055042	0.936415	0.991081	T	C
rs140242150	-0.00122248	-0.00659709	0.00415213	0.65574	0.680325	0.0123748	0.987282	0.00154928	-0.00173813	0.00483668	0.35565	0.864993	G	A
rs115505614	0.003558	-0.0124917	0.0196077	0.663928	0.222691	0.108703	0.987282	0.00839451	-0.0129411	0.0297301	0.440618	0.886498	C	T
rs4686471	-0.00643919	-0.0359669	0.0230886	0.669078	0	0.282902	0.987282	0.00771127	-0.032484	0.0479066	0.70691	0.958221	T	C
rs2268382	-0.0117897	-0.0658864	0.0423069	0.669269	0.681959	0.0121524	0.987282	-0.0223086	-0.105489	0.0608722	0.599131	0.9244	A	C
rs59944054	0.0072013	-0.0258438	0.0402464	0.669291	0.318116	0.0867835	0.987282	0.0147476	-0.0171371	0.0466323	0.36465	0.870042	G	A
rs465002	0.00562765	-0.0208328	0.0320881	0.676789	0	0.302967	0.987282	0.0139988	-0.0182292	0.0462268	0.394577	0.886498	C	T
rs62271373	-0.00273944	-0.0156905	0.0102117	0.678453	0	0.172371	0.987282	-0.00631781	-0.021962	0.0093264	0.428642	0.886498	T	A
rs148766658	-0.00238957	-0.0137154	0.00893631	0.679226	0	0.212926	0.987282	-0.00423091	-0.0178758	0.00941394	0.543364	0.9244	T	C
rs11793035	-0.00585569	-0.0338795	0.0221682	0.682142	0	0.492806	0.987282	-0.0229202	-0.0568564	0.0110159	0.185587	0.798949	C	T
rs878521	-0.00953823	-0.0557332	0.0366568	0.685707	0.640869	0.0182812	0.987282	-0.0042727	-0.0386329	0.0300875	0.807446	0.961325	G	A
rs80102379	0.00125552	-0.00491842	0.00742945	0.690208	0	0.276636	0.987282	0.00204242	-0.00830952	0.0123944	0.69898	0.958221	G	T
rs7240767	-0.00814214	-0.0488737	0.0325894	0.695212	0.417159	0.0639652	0.987282	0.0146062	-0.0214098	0.0506221	0.426695	0.886498	T	C
rs505922	-0.00654102	-0.0396609	0.0265789	0.698695	0.211701	0.111198	0.987282	-0.0064753	-0.0515524	0.0386018	0.77829	0.959342	T	C
rs560716466	-0.000399847	-0.00243225	0.00163255	0.699796	0	0.417749	0.987282	-0.00148331	-0.00404941	0.00108279	0.257239	0.81921	G	A
rs10195252	0.00861337	-0.0352344	0.0524611	0.700229	0.500058	0.0454877	0.987282	0.00299867	-0.0665229	0.0725203	0.932628	0.991081	T	C
rs34454109	-0.00822997	-0.0504013	0.0339413	0.702092	0.61208	0.0231701	0.987282	-0.000717334	-0.0590337	0.057599	0.980766	0.991081	A	T
rs96844	0.00530146	-0.0220507	0.0326536	0.704031	0	0.166728	0.987282	-0.0281138	-0.0613373	0.00510971	0.0972114	0.603974	G	A
rs703972	0.00584224	-0.0247433	0.0364278	0.708123	0	0.804073	0.987282	-0.0129655	-0.0500809	0.0241499	0.49355	0.907066	G	C
rs231349	0.00532301	-0.0227185	0.0333645	0.709854	0.627226	0.0205426	0.987282	0.0253684	6.16931e-05	0.0506751	0.0494441	0.50433	C	T
rs28719468	-0.00425686	-0.026794	0.0182803	0.711232	0.0304295	0.150936	0.987282	-0.0147465	-0.0415154	0.0120223	0.28027	0.81921	T	C
rs558308082	-0.000162876	-0.00102609	0.00070034	0.71152	0	0.226273	0.987282	-0.00118068	-0.00347357	0.00111221	0.312858	0.845966	G	C
rs10908278	0.00678641	-0.029289	0.0428618	0.712349	0.246312	0.103314	0.987282	-0.0357299	-0.07253	0.00107014	0.0570446	0.528959	T	A
rs4771648	0.00765855	-0.0335316	0.0488487	0.715545	0.466787	0.0527808	0.987282	-0.000655491	-0.0355599	0.0342489	0.970639	0.991081	G	A
rs1005752	0.00830903	-0.0367086	0.0533267	0.717534	0.588489	0.0274842	0.987282	-0.0132206	-0.0468636	0.0204225	0.441181	0.886498	C	A
rs1800961	-0.0021876	-0.0140411	0.00966588	0.717563	0	0.623544	0.987282	0.00219128	-0.0122281	0.0166106	0.765817	0.959342	C	T
rs62059712	0.00280455	-0.0124584	0.0180675	0.718741	0	0.188811	0.987282	-0.0124355	-0.0308316	0.00596054	0.1852	0.798949	T	C
rs231361	-0.00792336	-0.0525317	0.036685	0.727743	0.627502	0.0204959	0.987282	-0.00933659	-0.0410825	0.0224093	0.564322	0.9244	G	A
rs1796330	0.00555763	-0.0262818	0.037397	0.732264	0.070079	0.142503	0.987282	-0.00270046	-0.049146	0.0437451	0.909272	0.991081	G	C
rs78408340	-0.000845871	-0.00572937	0.00403763	0.734244	0.163398	0.122065	0.987282	0.0027188	-0.00256368	0.00800128	0.31309	0.845966	C	G
rs1580278	-0.00823271	-0.0558551	0.0393897	0.734739	0.589756	0.0272461	0.987282	-0.0110572	-0.0738662	0.0517518	0.730062	0.959342	C	A
rs562386202	0.00020433	-0.000987141	0.0013958	0.736779	0	0.752378	0.987282	6.43092e-05	-0.0013654	0.00149402	0.929749	0.991081	A	G
rs4810426	-0.00357237	-0.0246757	0.0175309	0.740053	0.151141	0.124793	0.987282	0.00742965	-0.021412	0.0362713	0.613637	0.9244	C	T
rs6063048	-0.00447224	-0.031203	0.0222586	0.742976	0	0.268357	0.987282	-0.016964	-0.0494748	0.0155467	0.306448	0.845966	G	A
rs1042725	-0.00505967	-0.0354308	0.0253115	0.744031	0	0.27853	0.987282	0.0296449	-0.0290983	0.0883882	0.322614	0.853331	C	T
rs601945	-0.0038617	-0.0272918	0.0195684	0.746668	0	0.440469	0.987282	0.00477658	-0.0237819	0.0333351	0.743051	0.959342	A	G
rs10811660	0.00568439	-0.0291236	0.0404924	0.748911	0.581481	0.0288129	0.987282	-0.0224975	-0.0612976	0.0163027	0.255771	0.81921	G	A
rs12719778	0.00488998	-0.0253292	0.0351092	0.751126	0	0.381572	0.987282	-0.000684336	-0.0490231	0.0476544	0.977864	0.991081	T	C
rs12001437	-0.0104489	-0.0766267	0.0557289	0.756971	0.776015	0.00280653	0.987282	-0.00299413	-0.0694673	0.0634791	0.929652	0.991081	T	C
rs117001013	-0.00519247	-0.0391252	0.0287402	0.764239	0.749918	0.00468453	0.987282	-0.017644	-0.0588446	0.0235567	0.401276	0.886498	C	T
rs11709077	-0.00305736	-0.0232161	0.0171014	0.76627	0	0.200467	0.987282	-0.0321185	-0.0614956	-0.00274142	0.032124	0.460726	G	A
rs138337556	-0.000315325	-0.00242186	0.00179121	0.769228	0	0.306537	0.987282	0.00139516	-0.00116827	0.00395859	0.286098	0.81921	A	G
rs145678014	0.0018244	-0.0104776	0.0141264	0.771308	0	0.285907	0.987282	-0.00603492	-0.0210057	0.00893581	0.429475	0.886498	G	T
rs9494624	-0.00905178	-0.0703322	0.0522286	0.772193	0.767689	0.00334477	0.987282	-0.0318131	-0.0658246	0.00219848	0.0667619	0.532515	A	G
rs12236906	-0.000938548	-0.00730525	0.00542816	0.772636	0	0.311475	0.987282	-0.00115406	-0.00900376	0.00669563	0.773228	0.959342	T	C
rs76895963	-0.000942543	-0.00737416	0.00548907	0.773937	0	0.222388	0.987282	-0.00852296	-0.0163466	-0.000699345	0.0327477	0.460726	T	G
rs6600191	0.00453558	-0.0271413	0.0362125	0.778992	0.423875	0.0624357	0.987282	0.0104462	-0.0208502	0.0417427	0.512981	0.9244	T	C
rs2272163	-0.00413349	-0.0342409	0.025974	0.787864	0	0.529539	0.987282	-0.00157796	-0.0381305	0.0349746	0.932571	0.991081	C	A
rs1260326	-0.00777077	-0.066701	0.0511594	0.796061	0.728843	0.00661073	0.987282	0.0125254	-0.0911868	0.116238	0.812885	0.961325	T	C
rs1903002	-0.00768778	-0.0663571	0.0509815	0.797313	0.701431	0.00964879	0.987282	0.00805923	-0.056998	0.0731165	0.808161	0.961325	C	G
rs3774723	-0.00289222	-0.0250875	0.019303	0.798415	0	0.278936	0.987282	-0.00938959	-0.0364105	0.0176313	0.495824	0.907159	G	A
rs243024	0.00510919	-0.0342961	0.0445144	0.7994	0.365185	0.0759025	0.987282	0.0407362	0.00403023	0.0774421	0.0296179	0.455593	G	A
rs12680028	-0.00383248	-0.0343918	0.0267269	0.805836	0	0.176743	0.987282	-0.0212602	-0.0891989	0.0466784	0.539654	0.9244	C	G
rs3217792	0.00366431	-0.0259444	0.033273	0.808345	0.70482	0.00924158	0.987282	-0.00133777	-0.040775	0.0380995	0.946992	0.991081	C	T
rs1801212	0.00374949	-0.0276442	0.0351432	0.814917	0.224333	0.108329	0.987282	0.0507074	0.0177899	0.0836249	0.00253438	0.179005	G	A
rs111827885	-0.00100714	-0.00944599	0.0074317	0.815052	0.574709	0.030116	0.987282	-0.00331817	-0.00931224	0.00267589	0.277926	0.81921	T	C
rs362307	-0.00189035	-0.0177631	0.0139824	0.815436	0	0.194473	0.987282	-0.00421976	-0.0339557	0.0255161	0.780909	0.959671	C	T
rs116913033	-0.00259272	-0.0243922	0.0192067	0.815677	0	0.834047	0.987282	-0.0124013	-0.0388848	0.0140823	0.358735	0.864993	C	T
rs4279506	0.00346898	-0.0260497	0.0329877	0.817834	0	0.367324	0.987282	0.00450032	-0.0316062	0.0406069	0.807006	0.961325	G	C
rs17522122	-0.0034842	-0.0334745	0.0265061	0.819876	0	0.175428	0.987282	-0.0109431	-0.0529598	0.0310736	0.609725	0.9244	G	T
rs510807	0.00501192	-0.0383163	0.0483402	0.820645	0.462905	0.0536443	0.987282	-0.0111596	-0.0605227	0.0382034	0.657697	0.95053	C	A
rs11696357	-0.00141811	-0.0137375	0.0109013	0.821501	0	0.485991	0.987282	-0.00821389	-0.0231645	0.00673668	0.281565	0.81921	A	G
rs60276348	0.00287776	-0.0224753	0.0282308	0.823948	0.378452	0.0728427	0.987282	0.00813356	-0.017858	0.0341251	0.539656	0.9244	C	T
rs571342427	-0.000177356	-0.00174467	0.00138996	0.824479	0	0.357854	0.987282	-6.30508e-06	-0.00196009	0.00194748	0.994953	0.994953	T	C
rs62368490	0.0010848	-0.00858819	0.0107578	0.826023	0	0.191639	0.987282	-0.00767292	-0.02186	0.00651414	0.289133	0.81921	C	T
rs543786825	0.000193588	-0.00155087	0.00193805	0.827816	0.673432	0.0133337	0.987282	0.000195295	-0.00199205	0.00238264	0.861085	0.986341	C	T
rs58432198	-0.00291046	-0.0295808	0.0237599	0.830637	0.457287	0.0548977	0.987282	-0.0038949	-0.032127	0.0243372	0.786855	0.961325	C	T
rs62357230	0.00116276	-0.00950349	0.011829	0.830811	0	0.282791	0.987282	0.0054658	-0.00849213	0.0194237	0.442782	0.886498	G	A
rs17802463	0.00292975	-0.0239518	0.0298113	0.83085	0	0.67749	0.987282	0.0192655	-0.013316	0.0518471	0.246484	0.81921	G	T
rs9430095	-0.00328935	-0.0337504	0.0271717	0.832382	0	0.232229	0.987282	-0.0147997	-0.0517182	0.0221189	0.432045	0.886498	C	G
rs76251711	0.00136086	-0.0113556	0.0140774	0.833866	0.662718	0.0148873	0.987282	0.00166337	-0.00957443	0.0129012	0.771735	0.959342	A	G
rs9379084	0.0020368	-0.0175229	0.0215965	0.838278	0.140382	0.127178	0.987282	-0.00461946	-0.0264028	0.0171639	0.677675	0.95053	G	A
rs11967262	-0.00464085	-0.0499383	0.0406566	0.840852	0.494707	0.0466463	0.987282	0.00509542	-0.063905	0.0740959	0.884919	0.991081	C	G
rs7918400	-0.00605311	-0.0657749	0.0536686	0.842535	0.706484	0.00904494	0.987282	-0.00231745	-0.0716673	0.0670324	0.947779	0.991081	T	C
rs62492368	-0.00287335	-0.0314978	0.0257511	0.844029	0	0.231656	0.987282	-0.00289555	-0.0449907	0.0391996	0.892756	0.991081	G	A
rs17819328	0.00301633	-0.0272001	0.0332327	0.844882	0	0.177447	0.987282	0.0209265	-0.0157979	0.0576509	0.264063	0.81921	T	G
rs11708067	0.00250964	-0.0226461	0.0276653	0.844974	0	0.187473	0.987282	-0.0251723	-0.0563259	0.00598128	0.11327	0.61619	A	G
rs2028150	-0.00472575	-0.0521536	0.0427021	0.845164	0.564835	0.0320475	0.987282	0.00708812	-0.0295342	0.0437105	0.704433	0.958221	C	G
rs12802972	0.00296447	-0.0272215	0.0331505	0.847365	0	0.438896	0.987282	0.0249713	-0.0283898	0.0783323	0.359038	0.864993	G	A
rs17013314	-0.000996571	-0.0111936	0.0092005	0.848095	0	0.656932	0.987282	0.00439026	-0.0149349	0.0237154	0.656131	0.95053	A	G
rs4923543	0.00274546	-0.0258895	0.0313805	0.850942	0	0.537871	0.987282	-0.00642242	-0.0412564	0.0284115	0.717828	0.958337	G	A
rs3934712	0.00236294	-0.0225118	0.0272377	0.852301	0	0.396274	0.987282	0.0145751	-0.0155631	0.0447133	0.343203	0.864039	T	C
rs5758223	-0.00253668	-0.0297662	0.0246929	0.855121	0	0.553675	0.987282	0.00416552	-0.0288522	0.0371832	0.8047	0.961325	G	A
rs10937721	0.00271822	-0.0265722	0.0320087	0.85567	0	0.402792	0.987282	0.0520337	0.0165265	0.0875409	0.0040761	0.207881	G	C
rs10469140	0.002801	-0.0276218	0.0332238	0.856798	0	0.308514	0.987282	0.00987963	-0.0269997	0.046759	0.599544	0.9244	A	G
rs10842994	-0.0031597	-0.0383264	0.032007	0.860214	0.503654	0.0447125	0.987282	-0.0243629	-0.0532555	0.00452964	0.0983939	0.603974	C	T
rs78025551	0.00241716	-0.025594	0.0304283	0.865694	0.481828	0.0494586	0.987282	-0.0292644	-0.062747	0.00421819	0.0867043	0.603974	C	G
rs9537803	-0.00408109	-0.0524884	0.0443262	0.868755	0.629854	0.020099	0.987282	0.0163446	-0.0620859	0.0947752	0.682943	0.95425	C	T
rs9687832	0.00281165	-0.031123	0.0367463	0.870997	0.437094	0.0594383	0.987282	0.00864516	-0.0296705	0.0469608	0.658325	0.95053	G	A
rs76011118	0.000785156	-0.00884285	0.0104132	0.873012	0	0.315318	0.987282	0.00134056	-0.0161389	0.01882	0.880515	0.991081	G	A
rs39328	-0.00243683	-0.0327715	0.0278979	0.874893	0	0.178805	0.987282	-0.0115644	-0.0483631	0.0252344	0.537936	0.9244	C	T
rs77864822	0.00281572	-0.0326407	0.0382722	0.876311	0.81396	0.00104257	0.987282	0.00647443	-0.045397	0.0583459	0.806738	0.961325	A	G
rs78403475	0.00175073	-0.0208476	0.024349	0.879311	0.320592	0.086211	0.987282	0.000998268	-0.041458	0.0434545	0.963243	0.991081	G	C
rs13085136	-0.00146044	-0.0204689	0.017548	0.880302	0.313692	0.0878059	0.987282	-0.00916533	-0.033643	0.0153123	0.463021	0.887969	C	T
rs2268078	0.00318515	-0.0394818	0.0458521	0.883673	0.501384	0.0452015	0.987282	0.00430913	-0.0808247	0.089443	0.920975	0.991081	G	A
rs146886108	0.000575356	-0.00721913	0.00836984	0.884966	0.789482	0.0020543	0.987282	-0.00163417	-0.00548217	0.00221383	0.405207	0.886498	C	T
rs117483894	-0.000831591	-0.0121949	0.0105317	0.885947	0	0.530861	0.987282	-0.0085965	-0.0274166	0.0102236	0.370649	0.874132	A	G
rs1562396	-0.00420022	-0.0630828	0.0546823	0.888811	0.760148	0.00388143	0.987282	0.0175453	-0.059363	0.0944536	0.654779	0.95053	A	G
rs7645517	0.00152985	-0.0201328	0.0231925	0.889912	0.590625	0.0270832	0.987282	-0.00155922	-0.0338868	0.0307683	0.924686	0.991081	G	A
rs2456530	-0.00242811	-0.0378838	0.0330276	0.893226	0.619065	0.0219437	0.987282	0.00687541	-0.017812	0.0315629	0.585172	0.9244	C	T
rs184509201	-0.000468161	-0.00744448	0.00650816	0.895358	0	0.854232	0.987282	0.00046321	-0.00790918	0.0088356	0.913649	0.991081	C	G
rs1708302	0.00237879	-0.0343519	0.0391095	0.898993	0.285667	0.0942751	0.987282	-0.0190869	-0.070812	0.0326381	0.469532	0.887969	C	T
rs11063028	0.00286416	-0.0416207	0.047349	0.89958	0.688011	0.0113449	0.987282	0.0168539	-0.0284793	0.0621871	0.466202	0.887969	T	C
rs329122	-0.00181959	-0.0318997	0.0282606	0.905623	0	0.878964	0.990943	0.0356689	-0.00736758	0.0787055	0.104284	0.603974	G	A
rs340874	-0.00165536	-0.0316383	0.0283276	0.913829	0	0.286995	0.990943	0.01475	-0.0217108	0.0512108	0.427841	0.886498	T	C
rs79687284	0.000604327	-0.0103418	0.0115505	0.913831	0.207008	0.112261	0.990943	0.0069411	-0.0149809	0.0288631	0.534878	0.9244	G	C
rs3826482	-0.00162658	-0.0315293	0.0282762	0.915096	0.00990599	0.155238	0.990943	-0.0230671	-0.0591693	0.0130351	0.210461	0.81921	A	T
rs8032939	-0.00269529	-0.0578233	0.0524327	0.923659	0.739308	0.00560877	0.990943	-0.0188567	-0.106996	0.0692828	0.674984	0.95053	T	C
rs4976033	0.00133381	-0.0289146	0.0315822	0.931128	0	0.157367	0.990943	0.0378356	-0.00964435	0.0853155	0.118324	0.635214	A	G
rs3811978	0.00133534	-0.0305746	0.0332452	0.934632	0.440006	0.0587804	0.990943	-0.0132677	-0.0796183	0.0530829	0.695116	0.958221	A	G
rs35654957	-0.00121027	-0.0310094	0.0285889	0.936553	0	0.233895	0.990943	-0.000991436	-0.0393773	0.0373945	0.959627	0.991081	T	C
rs80147536	-0.000648006	-0.0173375	0.0160415	0.93934	0	0.272843	0.990943	-0.019883	-0.0441176	0.00435167	0.10783	0.603974	A	T
rs3768321	0.00181006	-0.0466544	0.0502745	0.941646	0.697736	0.0101025	0.990943	0.00371352	-0.026982	0.034409	0.812567	0.961325	G	T
rs10193538	0.00100196	-0.0286777	0.0306816	0.947245	0	0.204717	0.990943	-0.0136186	-0.0496214	0.0223842	0.458459	0.886498	G	T
rs528122639	-4.47005e-05	-0.00143017	0.00134076	0.949579	0.297746	0.0914893	0.990943	0.000526921	-0.00151272	0.00256656	0.61262	0.9244	G	A
rs80244329	-0.000335873	-0.0111901	0.0105183	0.951639	0.447042	0.0571949	0.990943	-7.55182e-05	-0.0106815	0.0105305	0.988865	0.993737	G	A
rs10938398	-0.00100769	-0.0373418	0.0353264	0.95665	0.278928	0.0958276	0.990943	-0.0507095	-0.105407	0.00398781	0.0692065	0.532515	G	A
rs114447556	0.000410003	-0.0147465	0.0155665	0.957716	0	0.64509	0.990943	-0.00057667	-0.0188559	0.0177025	0.950696	0.991081	C	T
rs559138871	-6.73499e-05	-0.00263546	0.00250076	0.959006	0.278561	0.0959119	0.990943	-2.92996e-05	-0.00248779	0.00242919	0.981364	0.991081	C	T
rs2925979	-0.000789186	-0.0310493	0.0294709	0.959233	0.117879	0.132133	0.990943	-0.0297878	-0.0638319	0.00425616	0.0863579	0.603974	T	C
rs445084	0.00152276	-0.0572793	0.0603248	0.95952	0.715856	0.00797672	0.990943	0.025686	-0.0603992	0.111771	0.558674	0.9244	A	G
rs13262861	-0.00107561	-0.0427885	0.0406373	0.959692	0.693926	0.010581	0.990943	-0.0193877	-0.0600082	0.0212327	0.349546	0.864993	C	A
rs1426371	-0.000592135	-0.0266209	0.0254367	0.964436	0	0.373732	0.990943	-0.0154889	-0.0470189	0.0160412	0.33564	0.857626	G	A
rs2972144	0.000811865	-0.0394631	0.0410868	0.968485	0.450627	0.0563895	0.990943	0.0334201	-0.00162719	0.0684674	0.0616275	0.529645	A	G
rs66477705	-0.000184987	-0.00978454	0.00941456	0.969872	0	0.262592	0.990943	-0.00139417	-0.0131043	0.010316	0.815493	0.961621	T	C
rs3810291	-0.000524126	-0.029347	0.0282987	0.971569	0	0.239226	0.990943	-0.0321965	-0.0672451	0.00285196	0.0717852	0.532515	G	A
rs3115960	0.00109284	-0.0590563	0.061242	0.971593	0.736228	0.00589437	0.990943	0.0293979	-0.022976	0.0817717	0.27127	0.81921	G	C
rs4925109	0.000786039	-0.0453445	0.0469166	0.973358	0.585135	0.0281176	0.990943	-0.0254291	-0.0961305	0.0452722	0.480848	0.89986	A	G
rs1561927	0.000882885	-0.0532231	0.0549888	0.974486	0.732449	0.00625541	0.990943	-0.0119073	-0.0816089	0.0577943	0.737757	0.959342	C	T
rs6518681	-0.000375035	-0.0247113	0.0239613	0.975904	0.512565	0.0428043	0.990943	0.00856347	-0.0262438	0.0433708	0.629664	0.941036	A	G
rs7719891	0.000408144	-0.0269018	0.0277181	0.976632	0	0.252912	0.990943	-0.0118311	-0.050114	0.0264517	0.544703	0.9244	A	G
rs72802342	-0.000321247	-0.0229864	0.0223439	0.977838	0.513185	0.0426722	0.990943	-0.0174778	-0.038795	0.00383943	0.108064	0.603974	C	A
rs11759026	-0.000689386	-0.0573238	0.055945	0.980966	0.761399	0.00378917	0.990943	0.0133557	-0.0760368	0.102748	0.769653	0.959342	A	G
rs7222481	0.000472658	-0.0424412	0.0433865	0.982777	0.512661	0.042784	0.990943	-0.0197703	-0.0551465	0.0156058	0.273365	0.81921	G	C
rs55653563	-0.000312688	-0.0297631	0.0291377	0.983397	0.152797	0.124426	0.990943	-0.0236511	-0.055927	0.00862478	0.150939	0.72451	A	C
rs34855406	0.00022423	-0.0275499	0.0279984	0.987375	0	0.232775	0.990983	0.0139261	-0.0197153	0.0475674	0.417171	0.886498	G	C
rs1493694	0.000138739	-0.0186741	0.0189516	0.988468	0	0.210356	0.990983	0.00804187	-0.0219332	0.0380169	0.599006	0.9244	C	T
rs17168486	-2.39852e-05	-0.0336509	0.033603	0.998885	0.467002	0.052733	0.998885	0.01894	-0.0115849	0.0494648	0.223942	0.81921	C	T

## Sheet: MD
MD
Unadjusted model
Variable	Effect	Lower	Upper	P-value	I2	Heterogeneity	P-value (FDR)	REF	ALT
rs10096633	0.07286	0.0518642	0.0938558	1.03527e-11	0	0.250045	4.07895e-09	C	T
rs523288	-0.0497338	-0.0773616	-0.0221061	0.000418382	0	0.388264	0.0824213	A	T
rs138337556	0.00357393	0.00132689	0.00582097	0.00182494	0	0.466543	0.239675	A	G
rs4804833	0.0485877	0.0168409	0.0803345	0.00270267	0	0.490935	0.251387	A	G
rs1800961	-0.0185603	-0.0310514	-0.00606922	0.00358801	0	0.574084	0.251387	C	T
rs4281707	-0.0470595	-0.0792731	-0.0148459	0.00419344	0	0.620359	0.251387	G	A
rs12640250	-0.0430493	-0.0733767	-0.0127218	0.00540024	0.0817526	0.139991	0.251387	A	C
rs11967262	-0.0461156	-0.0786733	-0.013558	0.00550066	0	0.650767	0.251387	C	G
rs5213	-0.0437222	-0.0754758	-0.0119686	0.00696082	0.0226634	0.152569	0.251387	C	T
rs6458354	-0.0397671	-0.0686486	-0.0108855	0.00696155	0	0.754352	0.251387	C	T
rs28719468	-0.0321073	-0.0554493	-0.00876536	0.00701842	0	0.778524	0.251387	T	C
rs7903146	0.058449	0.01537	0.101528	0.00783144	0.492444	0.0471382	0.257132	C	T
rs738408	-0.0344309	-0.0614898	-0.00737203	0.0126332	0	0.422747	0.343967	C	T
rs7115753	-0.0403647	-0.0723201	-0.00840939	0.0132957	0	0.260463	0.343967	A	G
rs112595469	0.0134949	0.00279932	0.0241904	0.0134006	0	0.280878	0.343967	C	T
rs616279	-0.0356254	-0.0640316	-0.00721929	0.0139682	0	0.456283	0.343967	G	A
rs58730668	-0.0281005	-0.0510139	-0.00518707	0.0162321	0.0900339	0.1382	0.352027	T	C
rs7249758	0.0318987	0.00586701	0.0579305	0.0163191	0	0.274314	0.352027	G	A
rs4946812	0.0388653	0.0069561	0.0707745	0.0169759	0.0751852	0.141406	0.352027	G	A
rs917195	-0.0371633	-0.068182	-0.00614466	0.0188631	0.30213	0.0904772	0.371604	C	T
rs177045	-0.0352047	-0.065588	-0.00482147	0.0231478	0	0.566647	0.409723	A	G
rs11065299	0.0196002	0.00262007	0.0365803	0.0236733	0	0.308115	0.409723	G	A
rs1421085	-0.0366144	-0.0685409	-0.00468783	0.0245922	0	0.182973	0.409723	T	C
rs34715063	0.0235446	0.00278834	0.0443008	0.0261982	0.0348235	0.150009	0.409723	T	C
rs2642588	-0.0360305	-0.0678638	-0.00419725	0.0265285	0.112409	0.133331	0.409723	T	G
rs12001437	0.0354315	0.00402252	0.0668404	0.0270375	0	0.410034	0.409723	T	C
rs7943101	-0.0285768	-0.0546278	-0.00252574	0.031556	0.17157	0.120239	0.460484	C	T
rs78403475	0.0205159	0.00143921	0.0395927	0.0350457	0	0.832958	0.461016	G	C
rs10962	0.0256628	0.00177147	0.0495541	0.0352661	0	0.690544	0.461016	G	C
rs340874	0.0338397	0.00215374	0.0655257	0.0363326	0	0.765227	0.461016	T	C
rs13737	-0.0300897	-0.058342	-0.00183746	0.0368488	0.0757398	0.141286	0.461016	G	T
rs78408340	0.00490002	0.000284778	0.00951526	0.0374429	0	0.21266	0.461016	C	G
rs76263492	0.0118959	0.00036225	0.0234296	0.0432257	0	0.681587	0.497203	G	T
rs3826482	-0.0323369	-0.0637808	-0.000893065	0.0438386	0	0.253116	0.497203	A	T
rs11842871	0.0283942	0.000541478	0.0562469	0.0457094	0	0.461496	0.497203	G	T
rs17261179	0.0390352	0.000702418	0.077368	0.0459471	0.27865	0.0958916	0.497203	T	C
rs878521	0.0282707	0.000413918	0.0561275	0.0466916	0	0.340046	0.497203	G	A
rs702634	-0.0294186	-0.0587285	-0.000108632	0.0491569	0	0.765546	0.509679	G	A
rs1783541	0.0263049	-0.000239987	0.0528498	0.0521075	0	0.258694	0.52642	C	T
rs9828772	0.0185494	-0.000357587	0.0374565	0.0544932	0	0.226149	0.536758	C	G
rs1801645	0.0283284	-0.00119665	0.0578535	0.0600364	0	0.324715	0.576935	C	T
rs10954772	0.0291797	-0.00148659	0.0598459	0.0621882	0.0363373	0.149689	0.583384	T	C
rs2872246	0.0302808	-0.00210696	0.0626686	0.0668829	0	0.817547	0.612834	A	C
rs11657492	0.0228006	-0.00194236	0.0475435	0.0709021	0.388004	0.070644	0.622519	T	G
rs113414093	-0.0102223	-0.0213231	0.000878596	0.0710998	0	0.551874	0.622519	G	A
rs10406431	0.0291242	-0.0027448	0.0609933	0.073268	0	0.161035	0.627557	A	G
rs7240767	0.0281083	-0.00328009	0.0594967	0.0792341	0	0.174628	0.652961	T	C
rs78840640	0.0123756	-0.00145863	0.0262097	0.0795486	0.495588	0.0464552	0.652961	C	G
rs78025551	-0.019658	-0.0420279	0.00271187	0.0850042	0.157028	0.123484	0.683503	C	G
rs7669833	-0.0256405	-0.0550773	0.00379628	0.087785	0	0.512669	0.684232	T	A
rs2066827	0.0232395	-0.00350658	0.0499855	0.0885681	0.231626	0.106668	0.684232	T	G
rs862320	0.0267771	-0.00479483	0.0583491	0.0964518	0	0.497515	0.719777	C	T
rs4238013	-0.0274632	-0.0598802	0.00495373	0.0968228	0.335494	0.0827648	0.719777	C	T
rs13262861	-0.0191993	-0.0421331	0.00373444	0.100837	0	0.487091	0.735733	C	A
rs3810291	-0.0390305	-0.0859872	0.00792622	0.103287	0.568192	0.0313866	0.739907	G	A
rs67232546	0.0212349	-0.00486498	0.0473348	0.110795	0	0.311447	0.768453	C	T
rs7124681	-0.0257031	-0.0573282	0.00592202	0.111172	0	0.167975	0.768453	C	A
rs80147536	-0.0140904	-0.0318628	0.00368198	0.120206	0	0.166882	0.794962	A	T
rs13024606	0.00985127	-0.00268746	0.02239	0.12359	0	0.314952	0.794962	C	T
rs9687832	-0.0200169	-0.0457041	0.00567034	0.126684	0	0.446262	0.794962	G	A
rs145904381	0.00477012	-0.00145789	0.0109981	0.133313	0	0.294287	0.794962	T	C
rs3802177	-0.0323967	-0.0747478	0.00995431	0.133799	0.516864	0.0418906	0.794962	G	A
rs2431115	-0.0238161	-0.0550658	0.00743358	0.135245	0	0.590132	0.794962	A	G
rs62007683	0.0232526	-0.00730326	0.0538084	0.135829	0	0.825117	0.794962	G	T
rs57235767	0.0225995	-0.00710657	0.0523055	0.13594	0	0.213217	0.794962	C	T
rs188247550	0.00474545	-0.00149649	0.0109874	0.136206	0.13818	0.127665	0.794962	C	T
rs72926932	0.017097	-0.00543117	0.0396251	0.136896	0.34724	0.0800486	0.794962	A	C
rs11642430	-0.0238993	-0.0555102	0.00771166	0.138388	0	0.205174	0.794962	C	G
rs61881115	-0.0195799	-0.0456125	0.00645269	0.140442	0.24079	0.104577	0.794962	G	A
rs10195252	0.0292844	-0.0097289	0.0682978	0.141237	0.331332	0.0837274	0.794962	T	C
rs10757283	0.0235845	-0.00829839	0.0554674	0.147106	0	0.462332	0.816334	C	T
rs601945	0.0273673	-0.0102491	0.0649838	0.153884	0.564578	0.0320983	0.835799	A	G
rs13085136	0.0116217	-0.00439008	0.0276336	0.154856	0	0.354873	0.835799	C	T
rs7222481	0.0216185	-0.00858355	0.0518206	0.160637	0	0.417207	0.84491	G	C
rs7022807	0.0224787	-0.00893985	0.0538973	0.160833	0	0.197047	0.84491	A	G
rs7847880	-0.0162557	-0.039386	0.00687458	0.168376	0	0.185967	0.854259	T	C
rs116953931	-0.00834586	-0.0203338	0.00364205	0.172408	0	0.219494	0.854259	G	A
rs39328	0.0247441	-0.0115819	0.0610701	0.181855	0.211937	0.111145	0.854259	C	T
rs4929965	-0.0217289	-0.0538743	0.0104164	0.185219	0	0.690235	0.854259	A	G
rs10406327	-0.0263311	-0.0653733	0.0127112	0.186219	0.307237	0.0892977	0.854259	C	G
rs28505901	0.0363291	-0.0179934	0.0906516	0.189939	0.721686	0.00734696	0.854259	A	G
rs34855922	0.0183064	-0.00911533	0.0457282	0.190722	0	0.528319	0.854259	A	G
rs2102278	-0.0199984	-0.0501625	0.0101657	0.193797	0	0.771377	0.854259	A	G
rs11688931	0.0292767	-0.0149451	0.0734984	0.194432	0.725731	0.0069258	0.854259	C	G
rs4736819	0.0211122	-0.0107876	0.053012	0.194576	0	0.664608	0.854259	C	T
rs558308082	-0.000596361	-0.00150153	0.000308806	0.196598	0	0.463142	0.854259	G	C
rs2820446	0.0199608	-0.0105144	0.050436	0.199231	0.061724	0.144293	0.854259	C	G
rs1562396	-0.0199936	-0.0509564	0.0109692	0.205653	0.104912	0.134968	0.854259	A	G
rs12140153	0.0166251	-0.00927121	0.0425213	0.208294	0.502853	0.044885	0.854259	G	T
rs56337234	-0.0214345	-0.0549841	0.0121152	0.210498	0	0.228783	0.854259	C	T
rs145678014	-0.00826626	-0.0212193	0.00468679	0.21101	0	0.709841	0.854259	G	T
rs8046545	0.023759	-0.0137669	0.061285	0.214634	0.316871	0.0870713	0.854259	G	A
rs2268078	-0.0191028	-0.0493049	0.0110993	0.215096	0	0.290505	0.854259	G	A
rs1042725	-0.0203154	-0.0524386	0.0118079	0.215153	0	0.594303	0.854259	C	T
rs4923543	0.0346441	-0.0203295	0.0896178	0.216771	0.687712	0.0113841	0.854259	G	A
rs12680028	0.0202693	-0.0119768	0.0525155	0.21795	0	0.261337	0.854259	C	G
rs76811102	0.00721529	-0.00433099	0.0187616	0.220656	0	0.26755	0.854259	C	T
rs12802972	0.0196841	-0.0122119	0.0515801	0.226448	0	0.343507	0.854259	G	A
rs10228066	0.0196833	-0.0123528	0.0517194	0.228505	0	0.656302	0.854259	C	T
rs150111048	-0.00156881	-0.00413764	0.00100001	0.231315	0	0.255879	0.854259	A	G
rs10830963	0.0247448	-0.0158665	0.0653562	0.232391	0.470271	0.0520079	0.854259	C	G
rs17791513	0.00919313	-0.00613489	0.0245212	0.239792	0	0.274564	0.854259	A	G
rs9873618	-0.0174534	-0.0466657	0.0117588	0.241591	0	0.226421	0.854259	G	A
rs1317617	-0.0155743	-0.0417389	0.0105903	0.243348	0	0.213957	0.854259	G	A
rs528350911	0.00352472	-0.00248613	0.00953558	0.250429	0.217796	0.109815	0.854259	C	G
rs62059712	-0.00954989	-0.0258369	0.0067371	0.250463	0	0.473459	0.854259	T	C
rs4771648	0.017807	-0.0125915	0.0482056	0.250919	0	0.505995	0.854259	G	A
rs3217860	0.0164848	-0.0117133	0.044683	0.251874	0.0978686	0.136501	0.854259	A	G
rs528122639	-0.000651733	-0.00177114	0.000467674	0.253822	0	0.260542	0.854259	G	A
rs17689007	0.0184155	-0.0135589	0.0503898	0.258968	0	0.301782	0.854259	G	A
rs7629630	0.0132198	-0.00979419	0.0362338	0.260228	0	0.469938	0.854259	A	T
rs146886108	-0.00195613	-0.00536348	0.00145122	0.260504	0	0.805814	0.854259	C	T
rs557027608	-0.000460066	-0.00126354	0.000343413	0.261752	0	0.838327	0.854259	G	A
rs61676547	-0.0150798	-0.0415487	0.011389	0.264153	0	0.639077	0.854259	G	C
rs10893829	-0.0128033	-0.03529	0.00968341	0.264444	0	0.287391	0.854259	T	C
rs9494624	0.0168241	-0.0128147	0.0464629	0.265902	0.00105724	0.15708	0.854259	A	G
rs1412234	-0.0222431	-0.0615384	0.0170521	0.26724	0.400435	0.0677894	0.854259	T	C
rs1043246	0.0114902	-0.00889545	0.0318759	0.269282	0	0.444456	0.854259	C	G
rs112915006	-0.00763948	-0.0212061	0.00592716	0.269736	0	0.333761	0.854259	A	G
rs1412830	0.0172706	-0.0134403	0.0479816	0.270372	0	0.287086	0.854259	C	T
rs9430095	0.0207238	-0.01614	0.0575876	0.270532	0.222659	0.10871	0.854259	C	G
rs555759341	-0.00137131	-0.00384084	0.00109822	0.27644	0	0.376966	0.854259	G	C
rs2982521	0.025831	-0.0207064	0.0723684	0.276641	0.522907	0.0406138	0.854259	A	T
rs71372253	-0.00768767	-0.0215608	0.00618547	0.277437	0	0.18815	0.854259	T	C
rs4776970	0.0172697	-0.0140026	0.048542	0.279091	0	0.16194	0.854259	A	T
rs11717959	-0.0171007	-0.0480786	0.0138772	0.279273	0	0.718336	0.854259	G	T
rs28525376	-0.0199554	-0.0564813	0.0165706	0.284261	0.233271	0.106293	0.854259	G	T
rs291367	-0.0221534	-0.0628422	0.0185353	0.285916	0.39983	0.0679282	0.854259	G	A
rs11696357	0.00961879	-0.00809541	0.027333	0.287212	0.444297	0.0578127	0.854259	A	G
rs4457053	-0.015815	-0.0451784	0.0135484	0.291138	0	0.170329	0.854259	G	A
rs4977213	-0.0167387	-0.0478522	0.0143749	0.291684	0	0.194754	0.854259	C	T
rs117001013	-0.00911534	-0.0261384	0.00790769	0.293946	0	0.421405	0.854259	C	T
rs329122	0.0247596	-0.0214824	0.0710016	0.293978	0.51249	0.0428203	0.854259	G	A
rs10908278	-0.0171636	-0.0492719	0.0149446	0.294772	0	0.209089	0.854259	T	A
rs2197973	0.0173393	-0.0151241	0.0498027	0.295167	0	0.815586	0.854259	C	T
rs77464186	-0.0123265	-0.0354649	0.010812	0.296428	0	0.393493	0.854259	A	C
rs12920022	-0.012335	-0.0356966	0.0110266	0.300731	0	0.316518	0.854259	T	A
rs11708067	-0.0140229	-0.0406973	0.0126516	0.302841	0	0.168383	0.854259	A	G
rs77864822	0.00809252	-0.00731388	0.0234989	0.30324	0	0.263754	0.854259	A	G
rs6545714	0.0189803	-0.0172949	0.0552555	0.305122	0.237479	0.105333	0.854259	G	A
rs4932265	-0.0235543	-0.0687341	0.0216256	0.306867	0.582608	0.0285978	0.854259	T	C
rs8010382	0.0167	-0.0154585	0.0488585	0.308767	0	0.240383	0.854259	A	G
rs9379084	-0.00976472	-0.0286418	0.00911238	0.310656	0	0.301972	0.854259	G	A
rs562386202	0.000657849	-0.000626114	0.00194181	0.315281	0	0.24719	0.854259	A	G
rs559138871	0.00110775	-0.00105842	0.00327392	0.3162	0	0.820058	0.854259	C	T
rs7719891	0.0146958	-0.0140624	0.0434539	0.316553	0	0.173945	0.854259	A	G
rs1061810	0.0148532	-0.014421	0.0441273	0.320004	0	0.182293	0.854959	C	A
rs76549217	-0.00721704	-0.021513	0.00707891	0.322443	0.517717	0.0417097	0.854959	C	T
rs8032939	0.0142547	-0.0140776	0.0425871	0.324079	0	0.887935	0.854959	T	C
rs234853	-0.0140674	-0.0421811	0.0140462	0.32673	0	0.499534	0.854959	G	A
rs55653563	-0.0139082	-0.0419845	0.0141682	0.331595	0	0.524302	0.854959	A	C
rs231361	0.0187715	-0.0191301	0.056673	0.331693	0.455458	0.0553069	0.854959	G	A
rs6600191	0.0215426	-0.0220843	0.0651696	0.333137	0.677365	0.0127826	0.854959	T	C
rs1333052	-0.0146138	-0.0446886	0.015461	0.340907	0	0.83643	0.854959	A	C
rs6063048	0.0181369	-0.019423	0.0556967	0.343931	0.412534	0.0650207	0.854959	G	A
rs61850200	0.0136919	-0.0148728	0.0422566	0.347489	0	0.210132	0.854959	G	C
rs8037894	-0.0164865	-0.0509028	0.0179298	0.34779	0.130127	0.129442	0.854959	G	C
rs10305745	0.00167314	-0.00183151	0.00517779	0.349429	0	0.296692	0.854959	G	A
rs2238689	0.0243163	-0.0266536	0.0752861	0.349766	0.578419	0.0293998	0.854959	T	C
rs2028150	-0.017067	-0.0529088	0.0187748	0.350672	0.214112	0.110651	0.854959	C	G
rs862016	0.00757525	-0.00837811	0.0235286	0.352027	0	0.201766	0.854959	G	A
rs13041756	-0.00951561	-0.0296822	0.010651	0.355064	0	0.931786	0.854959	T	C
rs8017808	-0.0131302	-0.0410041	0.0147436	0.355871	0	0.261226	0.854959	G	T
rs10974438	0.0141493	-0.0162788	0.0445774	0.362084	0	0.373876	0.855758	A	C
rs429358	-0.00987604	-0.0311806	0.0114285	0.363577	0	0.26764	0.855758	T	C
rs560716466	-0.00120348	-0.00380675	0.00139979	0.364892	0.267484	0.0984599	0.855758	G	A
rs1903002	-0.0239403	-0.0763222	0.0284417	0.370377	0.610638	0.0234264	0.859031	C	G
rs12578639	-0.0112257	-0.0358217	0.0133704	0.371038	0	0.274749	0.859031	A	T
rs4810426	-0.00913716	-0.0292663	0.0109919	0.373636	0	0.16575	0.859031	C	T
rs12236906	-0.00293506	-0.00950767	0.00363756	0.381444	0	0.178671	0.859031	T	C
rs2237895	0.0143966	-0.0179077	0.0467009	0.382408	0	0.237892	0.859031	A	C
rs35999103	-0.016235	-0.0527625	0.0202924	0.383685	0.571584	0.0307232	0.859031	C	T
rs10842994	-0.0115347	-0.0375789	0.0145094	0.385365	0.0642601	0.14375	0.859031	C	T
rs62482405	0.00780106	-0.00983977	0.0254419	0.386091	0	0.289929	0.859031	T	G
rs9505097	-0.0153699	-0.050168	0.0194281	0.386657	0.439097	0.0589856	0.859031	C	T
rs1800574	-0.0049213	-0.016097	0.00625438	0.38809	0	0.17913	0.859031	C	T
rs3811978	0.010453	-0.0136248	0.0345308	0.394831	0	0.272204	0.864612	A	G
rs60276348	-0.00890183	-0.0294139	0.0116103	0.395	0.0308089	0.150856	0.864612	C	T
rs1112718	-0.0218262	-0.0725733	0.0289208	0.39924	0.608409	0.0238243	0.869065	A	G
rs62368490	-0.00751593	-0.0252804	0.0102485	0.406971	0.61281	0.0230409	0.881024	C	T
rs11688682	0.0114375	-0.0157475	0.0386225	0.40959	0	0.643267	0.881125	G	C
rs279744	-0.0125966	-0.0426584	0.0174651	0.41149	0	0.391767	0.881125	C	A
rs3217792	-0.0116645	-0.0399431	0.0166141	0.418829	0.662569	0.0149094	0.8887	C	T
rs77136196	0.0081926	-0.0118813	0.0282665	0.423766	0.548858	0.0352465	0.8887	C	T
rs184509201	-0.00355711	-0.0124211	0.00530688	0.431556	0.240047	0.104747	0.8887	C	G
rs6821438	-0.0128993	-0.0452583	0.0194597	0.434625	0	0.627	0.8887	A	G
rs6070625	0.0287029	-0.0436972	0.101103	0.437144	0.794711	0.00180068	0.8887	C	G
rs2233632	0.0117543	-0.0179038	0.0414124	0.437285	0	0.285455	0.8887	C	T
rs7987740	0.0182464	-0.0278691	0.0643619	0.438048	0.521113	0.0409919	0.8887	T	C
rs191830490	0.00152657	-0.0023404	0.00539355	0.439085	0	0.27538	0.8887	G	A
rs114447556	-0.00650374	-0.0232857	0.0102783	0.447512	0.0526339	0.146233	0.8887	C	T
rs76895963	-0.00402107	-0.0145634	0.00652127	0.454718	0.577352	0.0296053	0.8887	T	G
rs2456530	-0.00825353	-0.0299373	0.0134303	0.455653	0	0.233696	0.8887	C	T
rs180988137	0.00234977	-0.00383043	0.00852997	0.456154	0	0.578627	0.8887	A	G
rs6780171	-0.0114446	-0.0417975	0.0189083	0.459903	0	0.17137	0.8887	T	A
rs1377807	0.0111827	-0.0185629	0.0409283	0.461222	0	0.347646	0.8887	G	C
rs17802463	0.0150958	-0.0250727	0.0552643	0.461379	0.482537	0.0493028	0.8887	G	T
rs35352848	-0.0151121	-0.0553263	0.0251021	0.461405	0.56867	0.031293	0.8887	T	C
rs140242150	0.00231305	-0.0038572	0.00848331	0.462501	0.750605	0.00462784	0.8887	G	A
rs9563615	0.0110502	-0.0184636	0.0405641	0.463054	0	0.167801	0.8887	A	T
rs76197067	-2.19073e-05	-8.05342e-05	3.67197e-05	0.463934	0	0.568597	0.8887	A	G
rs2052261	0.0150151	-0.0251778	0.0552079	0.46405	0.445717	0.0574931	0.8887	G	A
rs1127215	0.0226748	-0.0381653	0.083515	0.465103	0.719959	0.00753073	0.8887	C	T
rs1005752	-0.0160371	-0.0593232	0.0272489	0.467747	0.53279	0.0385469	0.8887	C	A
rs62271373	-0.00510832	-0.0189164	0.00869973	0.468395	0	0.244775	0.8887	T	A
rs3772071	-0.0107035	-0.0396855	0.0182785	0.469161	0	0.30563	0.8887	C	T
rs116913033	-0.00968964	-0.0362073	0.016828	0.473882	0.237419	0.105347	0.893347	C	T
rs11820019	-0.00554101	-0.0208047	0.00972269	0.476772	0.59976	0.0253912	0.893613	T	C
rs11063028	-0.010907	-0.0411325	0.0193184	0.479401	0.301132	0.0907075	0.893613	T	C
rs56348580	-0.0141191	-0.0536536	0.0254155	0.483948	0.422201	0.0628167	0.893613	G	C
rs76251711	0.00239087	-0.0043946	0.00917634	0.489819	0	0.670237	0.893613	A	G
rs11680058	-0.00604715	-0.0232279	0.0111336	0.490287	0	0.411812	0.893613	G	A
rs1359790	0.0124483	-0.0229964	0.0478929	0.491235	0.337758	0.0822412	0.893613	G	A
rs35497231	-0.0106736	-0.0410686	0.0197213	0.491283	0	0.249224	0.893613	C	T
rs2972144	-0.010653	-0.0410511	0.0197452	0.492168	0	0.327772	0.893613	A	G
rs72802342	0.00540775	-0.010529	0.0213445	0.506009	0	0.71749	0.914529	C	A
rs11202627	-0.00787287	-0.031218	0.0154722	0.508628	0	0.27979	0.915066	C	T
rs2800733	-0.016504	-0.0657758	0.0327678	0.511498	0.649615	0.0168877	0.915159	A	G
rs4148856	-0.00872511	-0.0349121	0.0174619	0.513737	0	0.216361	0.915159	G	C
rs10193538	-0.0196738	-0.0795064	0.0401589	0.519276	0.715823	0.00798037	0.915159	G	T
rs17836088	0.0208832	-0.0429168	0.0846831	0.521171	0.812172	0.00110188	0.915159	G	C
rs2258238	-0.00650889	-0.0264307	0.0134129	0.521937	0	0.371822	0.915159	A	T
rs117483894	0.00391739	-0.0080922	0.015927	0.522616	0	0.176298	0.915159	A	G
rs4686471	0.00998544	-0.0211826	0.0411535	0.530055	0	0.351904	0.920403	T	C
rs7978610	0.00965733	-0.0205485	0.0398631	0.530898	0	0.225053	0.920403	G	C
rs11786992	0.0136719	-0.0295329	0.0568766	0.535114	0.487487	0.0482189	0.920403	A	C
rs10469140	-0.00996229	-0.0421088	0.0221842	0.543586	0	0.407269	0.920403	A	G
rs649961	-0.00986118	-0.0418591	0.0221368	0.545827	0	0.232016	0.920403	T	C
rs2581787	0.00993325	-0.0223639	0.0422304	0.546639	0	0.408723	0.920403	G	T
rs17819328	0.0174585	-0.039328	0.0742451	0.546792	0.671676	0.0135831	0.920403	T	G
rs3798519	-0.00761513	-0.0324662	0.017236	0.548112	0	0.159006	0.920403	A	C
rs7645517	-0.00422978	-0.018256	0.00979643	0.554486	0	0.884204	0.920403	G	A
rs67254669	0.00140875	-0.00327265	0.00609014	0.555323	0.706943	0.00899104	0.920403	A	G
rs445084	0.0137434	-0.0320231	0.0595099	0.556153	0.506047	0.0441983	0.920403	A	G
rs231349	-0.00510677	-0.022162	0.0119484	0.557294	0	0.592831	0.920403	C	T
rs79103584	-0.00207131	-0.00901632	0.00487369	0.55885	0	0.298126	0.920403	T	A
rs3768321	-0.0078267	-0.0345703	0.0189169	0.566241	0	0.304755	0.920403	G	T
rs1531583	-0.0075795	-0.0335074	0.0183484	0.566674	0.711696	0.00844244	0.920403	G	T
rs2189301	-0.00721994	-0.0320012	0.0175613	0.56798	0.258878	0.100436	0.920403	G	A
rs17122772	-0.00848312	-0.0376688	0.0207025	0.568892	0.168247	0.120982	0.920403	C	G
rs115505614	0.00875249	-0.0214001	0.0389051	0.569407	0.750434	0.00464194	0.920403	C	T
rs718314	0.0081001	-0.0198476	0.0360478	0.569995	0	0.265614	0.920403	A	G
rs11793035	-0.00857118	-0.0383596	0.0212173	0.572788	0	0.305383	0.92061	C	T
rs34855406	-0.0106104	-0.0476819	0.026461	0.574816	0.353596	0.0785796	0.92061	G	C
rs244665	-0.00814135	-0.037256	0.0209733	0.583647	0	0.168103	0.92061	G	A
rs9569864	0.00684574	-0.0180355	0.031727	0.589709	0	0.33775	0.92061	C	T
rs3887925	0.0087372	-0.0232831	0.0407575	0.592785	0	0.488495	0.92061	C	T
rs57327348	0.00713095	-0.019049	0.0333109	0.593438	0	0.452965	0.92061	A	T
rs10811660	0.00622613	-0.0166958	0.029148	0.594468	0.0132485	0.15454	0.92061	G	A
rs1708302	0.00862432	-0.0232879	0.0405365	0.596332	0	0.638643	0.92061	C	T
rs9537803	0.0139666	-0.0377439	0.0656771	0.596548	0.660082	0.015281	0.92061	C	T
rs10097617	-0.00871521	-0.041045	0.0236146	0.597255	0	0.15784	0.92061	T	C
rs11070332	0.00825245	-0.0224946	0.0389995	0.598853	0	0.470974	0.92061	G	A
rs10848958	-0.00653197	-0.0310473	0.0179834	0.601516	0.151288	0.124761	0.92061	C	T
rs6976111	0.00813916	-0.022488	0.0387663	0.602464	0	0.21397	0.92061	C	A
rs2272163	0.00841161	-0.0233505	0.0401738	0.603719	0	0.361328	0.92061	C	A
rs2280141	-0.0106548	-0.0510493	0.0297397	0.605172	0.342603	0.0811209	0.92061	T	G
rs75423501	-0.00504811	-0.0243627	0.0142664	0.608467	0.094874	0.137151	0.922062	A	G
rs2237897	-0.00301586	-0.0149356	0.00890385	0.619965	0	0.162219	0.934142	C	T
rs11042596	0.00878084	-0.0260988	0.0436605	0.621719	0.227892	0.107519	0.934142	T	G
rs3934712	-0.00881683	-0.0441521	0.0265184	0.624807	0.426709	0.0617917	0.934142	T	C
rs80244329	-0.00199915	-0.0100692	0.00607085	0.627298	0	0.449148	0.934142	G	A
rs141521721	0.00224994	-0.00685876	0.0113586	0.628293	0	0.697821	0.934142	C	A
rs28638142	-0.00325062	-0.0166498	0.0101486	0.634442	0	0.540049	0.939455	C	A
rs10750397	0.00711806	-0.0224139	0.0366501	0.636636	0	0.400514	0.939455	A	G
rs4709746	-0.00513721	-0.0267406	0.0164662	0.641163	0	0.284433	0.940783	C	T
rs11496066	-0.00577752	-0.0301575	0.0186024	0.642311	0	0.164977	0.940783	T	C
rs9860730	0.00986959	-0.0326882	0.0524274	0.649443	0.499452	0.0456187	0.94222	A	G
rs10882101	-0.0153005	-0.0813112	0.0507103	0.649616	0.7649	0.00353779	0.94222	T	C
rs187936726	0.00208822	-0.00694446	0.0111209	0.650466	0	0.868535	0.94222	A	G
rs34584161	-0.0090177	-0.0489968	0.0309614	0.658424	0.536898	0.0376957	0.94321	A	G
rs148766658	0.00263946	-0.00941241	0.0146913	0.667743	0	0.849321	0.94321	T	C
rs34298980	-0.00762948	-0.0429612	0.0277023	0.672126	0.184287	0.117387	0.94321	T	C
rs6459733	-0.0063729	-0.0361014	0.0233556	0.67437	0	0.517482	0.94321	G	C
rs13426680	0.00561971	-0.0206853	0.0319247	0.675421	0.610317	0.0234836	0.94321	A	G
rs62080313	-0.00432336	-0.0249741	0.0163273	0.681563	0	0.43697	0.94321	T	C
rs571342427	-0.000330571	-0.00192735	0.00126621	0.68492	0	0.418245	0.94321	T	C
rs96844	0.00811503	-0.031134	0.0473641	0.685303	0.449098	0.0567329	0.94321	G	A
rs12048743	0.00659817	-0.0257858	0.0389821	0.689643	0	0.771659	0.94321	C	G
rs576674	-0.00485963	-0.0288962	0.019177	0.691914	0	0.665008	0.94321	G	A
rs825452	-0.00632568	-0.0379726	0.0253212	0.695233	0	0.607453	0.94321	G	A
rs4279506	0.00620962	-0.0249348	0.0373541	0.69596	0	0.602563	0.94321	G	C
rs1260326	-0.0101492	-0.0617178	0.0414193	0.699688	0.626387	0.0206851	0.94321	T	C
rs79687284	0.00195553	-0.00805689	0.011968	0.701867	0	0.58642	0.94321	G	C
rs348330	0.00583743	-0.0241555	0.0358303	0.70286	0	0.391104	0.94321	G	A
rs72631105	-0.00477353	-0.0295078	0.0199608	0.705239	0	0.531354	0.94321	G	A
rs3115960	-0.00948919	-0.059081	0.0401026	0.707637	0.59426	0.0264055	0.94321	G	C
rs5758223	0.0105784	-0.0454245	0.0665814	0.71122	0.725834	0.00691522	0.94321	G	A
rs199795270	0.00122077	-0.00525661	0.00769815	0.711838	0.488759	0.0479411	0.94321	G	C
rs11699802	0.00604224	-0.0262253	0.0383098	0.71361	0	0.425348	0.94321	C	T
rs62107261	0.00204219	-0.0091391	0.0132235	0.720362	0	0.334142	0.94321	T	C
rs1796330	-0.00582897	-0.0378979	0.02624	0.721653	0	0.432044	0.94321	G	C
rs78020297	-0.00240206	-0.0158716	0.0110675	0.726695	0.000746573	0.157144	0.94321	G	A
rs34965774	-0.00580818	-0.038769	0.0271526	0.729812	0.516537	0.0419598	0.94321	G	A
rs1296328	0.0056094	-0.0264971	0.0377159	0.732028	0	0.372451	0.94321	A	C
rs56376556	-0.00303523	-0.0204151	0.0143446	0.732133	0.411033	0.0653636	0.94321	C	T
rs1316776	-0.00532485	-0.035841	0.0251913	0.732351	0	0.710603	0.94321	C	A
rs12811407	0.0156655	-0.0741883	0.105519	0.73257	0.876616	5.67074e-05	0.94321	G	A
rs1426371	-0.00476727	-0.0322515	0.022717	0.733883	0	0.280288	0.94321	G	A
rs536643418	-0.000388493	-0.00262971	0.00185273	0.734052	0	0.29101	0.94321	C	G
rs7078559	0.00740269	-0.0354431	0.0502484	0.734886	0.434778	0.059962	0.94321	C	T
rs2283164	-0.0022693	-0.0155137	0.0109751	0.737006	0	0.165753	0.94321	A	G
rs17772814	0.00265034	-0.0128432	0.0181439	0.737419	0.0652864	0.143531	0.94321	G	A
rs1801212	0.00580433	-0.0284103	0.0400189	0.739514	0.289865	0.0933075	0.94321	G	A
rs3845281	-0.00307175	-0.0213955	0.015252	0.742485	0	0.508607	0.94321	G	A
rs34454109	0.0055285	-0.0275461	0.0386031	0.743205	0.344208	0.0807498	0.94321	A	T
rs963740	-0.00947565	-0.0663151	0.0473638	0.743862	0.732657	0.00623524	0.94321	A	T
rs62357230	-0.00185981	-0.013043	0.00932336	0.744462	0	0.873086	0.94321	G	A
rs7178762	0.00538181	-0.0269862	0.0377498	0.744514	0	0.416371	0.94321	C	T
rs1493694	0.00464918	-0.0242848	0.0335832	0.752814	0.501386	0.0452012	0.947535	C	T
rs74452128	0.00149153	-0.0078125	0.0107956	0.753368	0.13645	0.128047	0.947535	C	A
rs28819812	-0.00973747	-0.0715148	0.0520399	0.757372	0.744752	0.00512294	0.947535	C	A
rs576406049	0.000230899	-0.00123508	0.00169688	0.757547	0.374319	0.0737953	0.947535	C	T
rs59944054	-0.00427214	-0.0320705	0.0235263	0.763252	0	0.41597	0.948764	G	A
rs4930091	-0.00422001	-0.0316983	0.0232583	0.763412	0	0.335342	0.948764	T	C
rs2796441	0.00781039	-0.0435704	0.0591912	0.765754	0.621174	0.0215783	0.948764	G	A
rs2268382	-0.00456126	-0.0351315	0.026009	0.769952	0	0.583309	0.949475	A	C
rs6011155	0.00458378	-0.0263025	0.0354701	0.771147	0	0.429796	0.949475	T	C
rs6885132	0.00482089	-0.0283064	0.0379481	0.775471	0.664534	0.0146186	0.950674	C	G
rs10937721	0.00492699	-0.0291596	0.0390136	0.776947	0.154672	0.124009	0.950674	G	C
rs2283220	-0.00393995	-0.0318036	0.0239237	0.781672	0	0.396956	0.95307	A	G
rs1580278	-0.00424218	-0.034924	0.0264396	0.786397	0	0.555472	0.95307	C	A
rs510807	0.00773293	-0.049407	0.0648729	0.790818	0.675086	0.0131006	0.95307	C	A
rs35913461	0.00318427	-0.0203483	0.0267168	0.790848	0	0.558159	0.95307	C	T
rs7918400	-0.00707089	-0.0601128	0.045971	0.793878	0.611098	0.0233445	0.95307	T	C
rs62492368	-0.00399233	-0.0340878	0.0261032	0.794864	0	0.511729	0.95307	G	A
rs66477705	0.00133495	-0.0087774	0.0114473	0.795838	0	0.350852	0.95307	T	C
rs539515	0.00333283	-0.0227375	0.0294032	0.802153	0	0.210256	0.953881	A	C
rs17522122	0.00411187	-0.0282721	0.0364958	0.803468	0.0355538	0.149855	0.953881	G	T
rs11709077	0.0026972	-0.0185794	0.0239739	0.803778	0	0.296121	0.953881	G	A
rs2465043	0.00346603	-0.027454	0.034386	0.8261	0	0.289463	0.975511	G	A
rs6708643	-0.00609229	-0.0613998	0.0492152	0.829069	0.648326	0.0170902	0.975511	G	A
rs3751837	-0.00293394	-0.0296489	0.023781	0.829571	0	0.466784	0.975511	C	T
rs703972	-0.00347383	-0.0357016	0.0287539	0.832681	0	0.448609	0.975511	G	C
rs569511541	-5.21419e-06	-5.47701e-05	4.43417e-05	0.836616	0	0.164045	0.975511	A	G
rs2767036	0.00309947	-0.0267806	0.0329795	0.838894	0	0.590319	0.975511	C	A
rs7867635	0.00321908	-0.0279003	0.0343385	0.839335	0	0.287139	0.975511	T	C
rs41277236	0.00163701	-0.0145087	0.0177827	0.842481	0.484355	0.0489043	0.976287	C	T
rs11926707	0.00299288	-0.0276701	0.0336559	0.848288	0	0.484414	0.977646	T	C
rs8107974	0.00303481	-0.0283282	0.0343978	0.84958	0.667363	0.0142045	0.977646	A	T
rs2727301	0.00466934	-0.044278	0.0536167	0.851683	0.66014	0.0152723	0.977646	T	C
rs1516728	0.0034495	-0.0331843	0.0400833	0.853579	0.424628	0.0622647	0.977646	T	A
rs58432198	0.00321439	-0.0317213	0.0381501	0.85689	0.666767	0.0142912	0.978594	C	T
rs543786825	-7.66467e-05	-0.000929407	0.000776114	0.860166	0	0.560002	0.979495	C	T
rs505922	0.00395744	-0.0417115	0.0496264	0.865136	0.542882	0.0364648	0.979841	T	C
rs35654957	-0.00272037	-0.034186	0.0287453	0.865444	0	0.600695	0.979841	T	C
rs4688760	-0.00248637	-0.0327032	0.0277304	0.871877	0	0.518793	0.981288	C	T
rs3111316	-0.00299456	-0.0395347	0.0335456	0.872389	0.237583	0.105309	0.981288	G	A
rs80102379	-0.000523997	-0.00709486	0.00604687	0.875798	0	0.163323	0.981288	G	T
rs112498319	0.00365053	-0.043685	0.0509861	0.879855	0.519863	0.0412558	0.981288	C	A
rs17013314	0.000806919	-0.00972844	0.0113423	0.880673	0	0.430358	0.981288	A	G
rs74653713	-0.000899307	-0.0127401	0.0109415	0.881665	0	0.328438	0.981288	C	A
rs17168486	-0.00177358	-0.0267892	0.0232421	0.889483	0	0.169596	0.98523	C	T
rs2249105	-0.00257833	-0.0391867	0.03403	0.890208	0.273882	0.0969888	0.98523	A	G
rs17684074	0.00421011	-0.0577576	0.0661778	0.894066	0.778645	0.00264819	0.985774	G	C
rs12454712	0.00178154	-0.025627	0.0291901	0.898626	0	0.73103	0.985774	T	C
rs4925109	0.00313578	-0.0472668	0.0535384	0.902948	0.635911	0.019091	0.985774	A	G
rs111827885	0.000325196	-0.00500173	0.00565212	0.90476	0	0.602008	0.985774	T	C
rs11759026	-0.00168372	-0.0295757	0.0262082	0.905818	0	0.344733	0.985774	A	G
rs2307111	0.00241823	-0.0382919	0.0431283	0.907316	0.384352	0.071484	0.985774	T	C
rs74368513	0.000142801	-0.00228482	0.00257042	0.908214	0	0.305464	0.985774	G	A
rs1561927	0.00227509	-0.0376599	0.0422101	0.911094	0.486389	0.0484589	0.986184	C	T
rs549498088	-0.000118774	-0.0024337	0.00219615	0.919899	0.321529	0.0859944	0.989678	C	T
rs2908334	0.00208415	-0.0391896	0.0433579	0.921162	0.41444	0.0645856	0.989678	C	T
rs76011118	-0.000511147	-0.0107241	0.00970179	0.921858	0	0.945985	0.989678	G	A
rs6884702	0.00149861	-0.0302211	0.0332183	0.926222	0	0.230559	0.991661	A	G
rs35895680	-0.00117178	-0.031161	0.0288175	0.938956	0	0.319108	0.998628	C	A
rs243024	0.00125018	-0.0307718	0.0332721	0.939006	0	0.464302	0.998628	G	A
rs465002	-0.00102741	-0.0287797	0.0267249	0.942157	0	0.364696	0.998628	C	T
rs9957145	0.000859968	-0.0226862	0.0244061	0.942934	0	0.222376	0.998628	G	A
rs1641523	0.00100205	-0.0309962	0.0330004	0.951058	0	0.264339	0.998628	C	T
rs2925979	0.000879899	-0.0287405	0.0305003	0.953572	0	0.624717	0.998628	T	C
rs73224262	-0.000148799	-0.0053581	0.0050605	0.955354	0.0191225	0.153311	0.998628	C	T
rs12910825	-0.00165509	-0.061933	0.0586229	0.957082	0.734888	0.00602112	0.998628	A	G
rs11137820	-0.00188436	-0.0715047	0.067736	0.957693	0.788001	0.00212999	0.998628	C	G
rs75253922	0.000852608	-0.0335656	0.0352708	0.961276	0.429251	0.0612147	0.998628	T	C
rs73226260	0.000257057	-0.010954	0.0114681	0.964155	0	0.245636	0.998628	G	A
rs11257655	0.000524098	-0.0262325	0.0272807	0.969376	0	0.208363	0.998628	C	T
rs286925	0.000454242	-0.0245361	0.0254446	0.971581	0	0.616412	0.998628	A	G
rs7756992	0.000450744	-0.0294178	0.0303193	0.976404	0	0.82176	0.998628	A	G
rs149364428	-6.8378e-05	-0.00491586	0.0047791	0.977944	0	0.374271	0.998628	G	A
rs12719778	-0.000428796	-0.0323855	0.0315279	0.979019	0	0.428415	0.998628	T	C
rs362307	0.000216782	-0.0210685	0.0215021	0.984074	0.361287	0.0768025	0.998628	C	T
rs1575972	-0.000114868	-0.0117595	0.0115297	0.984575	0.162231	0.122325	0.998628	T	A
rs4976033	0.000321644	-0.0360111	0.0366544	0.986157	0.210837	0.111394	0.998628	A	G
rs474513	0.000279555	-0.0319506	0.0325097	0.986436	0	0.797152	0.998628	A	G
rs17250977	-9.36535e-05	-0.0115523	0.011365	0.987219	0.0575754	0.145179	0.998628	A	G
rs6518681	-7.04921e-05	-0.0169163	0.0167753	0.993456	0	0.36711	0.998628	A	G
rs62370480	6.65357e-05	-0.0270807	0.0272138	0.996167	0	0.624975	0.998628	G	A
rs114526150	1.43518e-05	-0.0092406	0.0092693	0.997575	0	0.451698	0.998628	T	G
rs3774723	4.81652e-05	-0.0363455	0.0364419	0.99793	0.580009	0.0290946	0.998628	G	A
rs10938398	2.7808e-05	-0.0316655	0.0317211	0.998628	0	0.361203	0.998628	G	A

## Sheet: MDH
MDH
Unadjusted model								Adjusted model
Variable	Effect	Lower	Upper	P-value	I2	Heterogeneity	P-value (FDR)	Effect	Lower	Upper	P-value	P-value (FDR)	REF	ALT
rs10096633	0.07286	0.0518642	0.0938558	1.03527e-11	0	0.250045	4.07895e-09	-0.00519727	-0.0326412	0.0222466	0.710508	0.983637	C	T
rs523288	-0.0497338	-0.0773616	-0.0221061	0.000418382	0	0.388264	0.0824213	-0.0419997	-0.078236	-0.0057634	0.0231048	0.771116	A	T
rs138337556	0.00357393	0.00132689	0.00582097	0.00182494	0	0.466543	0.239675	0.00308185	0.000116843	0.00604686	0.0416299	0.771116	A	G
rs4804833	0.0485877	0.0168409	0.0803345	0.00270267	0	0.490935	0.251387	0.0481117	0.00652184	0.0897015	0.0233711	0.771116	A	G
rs1800961	-0.0185603	-0.0310514	-0.00606922	0.00358801	0	0.574084	0.251387	0.014933	-0.00466122	0.0345271	0.135251	0.862225	C	T
rs4281707	-0.0470595	-0.0792731	-0.0148459	0.00419344	0	0.620359	0.251387	-0.0433097	-0.0855608	-0.00105869	0.0445292	0.771116	G	A
rs12640250	-0.0430493	-0.0733767	-0.0127218	0.00540024	0.0817526	0.139991	0.251387	-0.0359149	-0.0738896	0.00205976	0.0637885	0.771116	A	C
rs11967262	-0.0461156	-0.0786733	-0.013558	0.00550066	0	0.650767	0.251387	-0.0115151	-0.0542239	0.0311938	0.597193	0.983637	C	G
rs5213	-0.0437222	-0.0754758	-0.0119686	0.00696082	0.0226634	0.152569	0.251387	-0.0496643	-0.103938	0.00460902	0.0728899	0.771116	C	T
rs6458354	-0.0397671	-0.0686486	-0.0108855	0.00696155	0	0.754352	0.251387	-0.0224388	-0.0603435	0.0154658	0.245943	0.9378	C	T
rs28719468	-0.0321073	-0.0554493	-0.00876536	0.00701842	0	0.778524	0.251387	-0.0269973	-0.0576372	0.00364261	0.0841759	0.79917	T	C
rs7903146	0.058449	0.01537	0.101528	0.00783144	0.492444	0.0471382	0.257132	0.030171	-0.0173942	0.0777361	0.213786	0.929148	C	T
rs738408	-0.0344309	-0.0614898	-0.00737203	0.0126332	0	0.422747	0.343967	-0.0204564	-0.0558986	0.0149858	0.257952	0.938432	C	T
rs7115753	-0.0403647	-0.0723201	-0.00840939	0.0132957	0	0.260463	0.343967	-0.0384748	-0.0803581	0.00340851	0.071788	0.771116	A	G
rs112595469	0.0134949	0.00279932	0.0241904	0.0134006	0	0.280878	0.343967	0.0163019	0.00051358	0.0320903	0.042999	0.771116	C	T
rs616279	-0.0356254	-0.0640316	-0.00721929	0.0139682	0	0.456283	0.343967	-0.0357507	-0.0730076	0.00150625	0.0600093	0.771116	G	A
rs58730668	-0.0281005	-0.0510139	-0.00518707	0.0162321	0.0900339	0.1382	0.352027	-0.0357962	-0.070798	-0.000794346	0.0450225	0.771116	T	C
rs7249758	0.0318987	0.00586701	0.0579305	0.0163191	0	0.274314	0.352027	0.0154195	-0.0187227	0.0495617	0.376065	0.939379	G	A
rs4946812	0.0388653	0.0069561	0.0707745	0.0169759	0.0751852	0.141406	0.352027	0.0355658	-0.0337639	0.104896	0.314679	0.939379	G	A
rs917195	-0.0371633	-0.068182	-0.00614466	0.0188631	0.30213	0.0904772	0.371604	-0.0521688	-0.085832	-0.0185056	0.00238619	0.771116	C	T
rs177045	-0.0352047	-0.065588	-0.00482147	0.0231478	0	0.566647	0.409723	-0.0413631	-0.0811871	-0.00153913	0.0417791	0.771116	A	G
rs11065299	0.0196002	0.00262007	0.0365803	0.0236733	0	0.308115	0.409723	0.017466	-0.00482897	0.039761	0.124674	0.862225	G	A
rs1421085	-0.0366144	-0.0685409	-0.00468783	0.0245922	0	0.182973	0.409723	-0.0230975	-0.0649495	0.0187545	0.279397	0.938432	T	C
rs34715063	0.0235446	0.00278834	0.0443008	0.0261982	0.0348235	0.150009	0.409723	0.0261959	-0.000530786	0.0529225	0.0547267	0.771116	T	C
rs2642588	-0.0360305	-0.0678638	-0.00419725	0.0265285	0.112409	0.133331	0.409723	-0.0434324	-0.0825446	-0.00432027	0.029521	0.771116	T	G
rs12001437	0.0354315	0.00402252	0.0668404	0.0270375	0	0.410034	0.409723	0.0474302	0.0061773	0.0886831	0.0242306	0.771116	T	C
rs7943101	-0.0285768	-0.0546278	-0.00252574	0.031556	0.17157	0.120239	0.460484	-0.0152429	-0.0505571	0.0200714	0.397558	0.939379	C	T
rs78403475	0.0205159	0.00143921	0.0395927	0.0350457	0	0.832958	0.461016	0.0127175	-0.0251763	0.0506112	0.510679	0.983637	G	C
rs10962	0.0256628	0.00177147	0.0495541	0.0352661	0	0.690544	0.461016	0.0294497	-0.00205145	0.0609509	0.066903	0.771116	G	C
rs340874	0.0338397	0.00215374	0.0655257	0.0363326	0	0.765227	0.461016	0.0188003	-0.0320245	0.069625	0.468453	0.971205	T	C
rs13737	-0.0300897	-0.058342	-0.00183746	0.0368488	0.0757398	0.141286	0.461016	-0.0174254	-0.0529738	0.0181229	0.336675	0.939379	G	T
rs78408340	0.00490002	0.000284778	0.00951526	0.0374429	0	0.21266	0.461016	0.0048162	-0.00125275	0.0108852	0.119853	0.862225	C	G
rs76263492	0.0118959	0.00036225	0.0234296	0.0432257	0	0.681587	0.497203	0.0104019	-0.00477981	0.0255836	0.179308	0.929148	G	T
rs3826482	-0.0323369	-0.0637808	-0.000893065	0.0438386	0	0.253116	0.497203	-0.0394866	-0.0990108	0.0200376	0.193539	0.929148	A	T
rs11842871	0.0283942	0.000541478	0.0562469	0.0457094	0	0.461496	0.497203	0.0306874	-0.00590045	0.0672753	0.1002	0.862225	G	T
rs17261179	0.0390352	0.000702418	0.077368	0.0459471	0.27865	0.0958916	0.497203	0.0376125	-0.0210016	0.0962266	0.208499	0.929148	T	C
rs878521	0.0282707	0.000413918	0.0561275	0.0466916	0	0.340046	0.497203	0.0132892	-0.0232396	0.0498179	0.475824	0.971205	G	A
rs702634	-0.0294186	-0.0587285	-0.000108632	0.0491569	0	0.765546	0.509679	-0.0298785	-0.0683042	0.00854726	0.127509	0.862225	G	A
rs1783541	0.0263049	-0.000239987	0.0528498	0.0521075	0	0.258694	0.52642	0.045966	0.0111146	0.0808174	0.00973732	0.771116	C	T
rs9828772	0.0185494	-0.000357587	0.0374565	0.0544932	0	0.226149	0.536758	0.0289171	-0.0159289	0.0737631	0.206301	0.929148	C	G
rs1801645	0.0283284	-0.00119665	0.0578535	0.0600364	0	0.324715	0.576935	0.0343127	-0.0167912	0.0854165	0.188182	0.929148	C	T
rs10954772	0.0291797	-0.00148659	0.0598459	0.0621882	0.0363373	0.149689	0.583384	0.0377359	-0.00169789	0.0771697	0.0607138	0.771116	T	C
rs2872246	0.0302808	-0.00210696	0.0626686	0.0668829	0	0.817547	0.612834	0.0333037	-0.00918358	0.075791	0.12446	0.862225	A	C
rs11657492	0.0228006	-0.00194236	0.0475435	0.0709021	0.388004	0.070644	0.622519	0.0197075	-0.00478056	0.0441956	0.114717	0.862225	T	G
rs113414093	-0.0102223	-0.0213231	0.000878596	0.0710998	0	0.551874	0.622519	-0.0135355	-0.0280658	0.000994807	0.067884	0.771116	G	A
rs10406431	0.0291242	-0.0027448	0.0609933	0.073268	0	0.161035	0.627557	0.0334277	-0.0216623	0.0885177	0.234332	0.929148	A	G
rs7240767	0.0281083	-0.00328009	0.0594967	0.0792341	0	0.174628	0.652961	0.0209495	-0.063354	0.105253	0.626221	0.983637	T	C
rs78840640	0.0123756	-0.00145863	0.0262097	0.0795486	0.495588	0.0464552	0.652961	0.0195673	-0.00187698	0.0410117	0.0737096	0.771116	C	G
rs78025551	-0.019658	-0.0420279	0.00271187	0.0850042	0.157028	0.123484	0.683503	-0.0126961	-0.0394984	0.0141062	0.353187	0.939379	C	G
rs7669833	-0.0256405	-0.0550773	0.00379628	0.087785	0	0.512669	0.684232	-0.0408276	-0.0837358	0.00208055	0.0621914	0.771116	T	A
rs2066827	0.0232395	-0.00350658	0.0499855	0.0885681	0.231626	0.106668	0.684232	0.0188213	-0.0214251	0.0590678	0.359363	0.939379	T	G
rs862320	0.0267771	-0.00479483	0.0583491	0.0964518	0	0.497515	0.719777	0.033713	-0.00768294	0.075109	0.110444	0.862225	C	T
rs4238013	-0.0274632	-0.0598802	0.00495373	0.0968228	0.335494	0.0827648	0.719777	-0.0197457	-0.0540352	0.0145438	0.259046	0.938432	C	T
rs13262861	-0.0191993	-0.0421331	0.00373444	0.100837	0	0.487091	0.735733	-0.00418403	-0.0343414	0.0259734	0.78568	0.985223	C	A
rs3810291	-0.0390305	-0.0859872	0.00792622	0.103287	0.568192	0.0313866	0.739907	-0.0410254	-0.132216	0.0501652	0.377906	0.939379	G	A
rs67232546	0.0212349	-0.00486498	0.0473348	0.110795	0	0.311447	0.768453	0.0136899	-0.0205994	0.0479792	0.433916	0.950692	C	T
rs7124681	-0.0257031	-0.0573282	0.00592202	0.111172	0	0.167975	0.768453	-0.0130902	-0.063772	0.0375916	0.6127	0.983637	C	A
rs80147536	-0.0140904	-0.0318628	0.00368198	0.120206	0	0.166882	0.794962	-0.0109586	-0.0439934	0.0220762	0.515578	0.983637	A	T
rs13024606	0.00985127	-0.00268746	0.02239	0.12359	0	0.314952	0.794962	0.0185542	0.00210073	0.0350077	0.0270909	0.771116	C	T
rs9687832	-0.0200169	-0.0457041	0.00567034	0.126684	0	0.446262	0.794962	-0.0167753	-0.0505172	0.0169665	0.329843	0.939379	G	A
rs145904381	0.00477012	-0.00145789	0.0109981	0.133313	0	0.294287	0.794962	0.00475088	-0.00338015	0.0128819	0.252132	0.938432	T	C
rs3802177	-0.0323967	-0.0747478	0.00995431	0.133799	0.516864	0.0418906	0.794962	-0.0135351	-0.071146	0.0440758	0.645176	0.983637	G	A
rs2431115	-0.0238161	-0.0550658	0.00743358	0.135245	0	0.590132	0.794962	-0.0270705	-0.0693329	0.015192	0.209327	0.929148	A	G
rs62007683	0.0232526	-0.00730326	0.0538084	0.135829	0	0.825117	0.794962	0.0502312	0.0101546	0.0903078	0.0140268	0.771116	G	T
rs57235767	0.0225995	-0.00710657	0.0523055	0.13594	0	0.213217	0.794962	0.00748717	-0.031462	0.0464363	0.70635	0.983637	C	T
rs188247550	0.00474545	-0.00149649	0.0109874	0.136206	0.13818	0.127665	0.794962	0.00409936	-0.00341657	0.0116153	0.285066	0.938432	C	T
rs72926932	0.017097	-0.00543117	0.0396251	0.136896	0.34724	0.0800486	0.794962	0.0125882	-0.010943	0.0361193	0.29441	0.938432	A	C
rs11642430	-0.0238993	-0.0555102	0.00771166	0.138388	0	0.205174	0.794962	-0.00733521	-0.0488122	0.0341418	0.728877	0.983637	C	G
rs61881115	-0.0195799	-0.0456125	0.00645269	0.140442	0.24079	0.104577	0.794962	-0.0311993	-0.0606995	-0.00169902	0.0381867	0.771116	G	A
rs10195252	0.0292844	-0.0097289	0.0682978	0.141237	0.331332	0.0837274	0.794962	0.0359746	-0.0125598	0.084509	0.14629	0.881105	T	C
rs10757283	0.0235845	-0.00829839	0.0554674	0.147106	0	0.462332	0.816334	0.019954	-0.021818	0.0617261	0.349144	0.939379	C	T
rs601945	0.0273673	-0.0102491	0.0649838	0.153884	0.564578	0.0320983	0.835799	0.0163211	-0.0215275	0.0541696	0.398012	0.939379	A	G
rs13085136	0.0116217	-0.00439008	0.0276336	0.154856	0	0.354873	0.835799	0.0115421	-0.0133519	0.036436	0.36349	0.939379	C	T
rs7222481	0.0216185	-0.00858355	0.0518206	0.160637	0	0.417207	0.84491	-0.00151018	-0.0543608	0.0513405	0.955338	0.991801	G	C
rs7022807	0.0224787	-0.00893985	0.0538973	0.160833	0	0.197047	0.84491	-0.00402557	-0.0515379	0.0434868	0.868109	0.991801	A	G
rs7847880	-0.0162557	-0.039386	0.00687458	0.168376	0	0.185967	0.854259	-0.0157435	-0.0801101	0.0486231	0.631661	0.983637	T	C
rs116953931	-0.00834586	-0.0203338	0.00364205	0.172408	0	0.219494	0.854259	-0.00814215	-0.0238746	0.00759026	0.310411	0.939379	G	A
rs39328	0.0247441	-0.0115819	0.0610701	0.181855	0.211937	0.111145	0.854259	0.0211583	-0.0264743	0.0687909	0.383966	0.939379	C	T
rs4929965	-0.0217289	-0.0538743	0.0104164	0.185219	0	0.690235	0.854259	0.0153684	-0.0269003	0.0576371	0.476081	0.971205	A	G
rs10406327	-0.0263311	-0.0653733	0.0127112	0.186219	0.307237	0.0892977	0.854259	-0.0397397	-0.0818441	0.00236471	0.0643299	0.771116	C	G
rs28505901	0.0363291	-0.0179934	0.0906516	0.189939	0.721686	0.00734696	0.854259	0.0169627	-0.0198964	0.0538217	0.367066	0.939379	A	G
rs34855922	0.0183064	-0.00911533	0.0457282	0.190722	0	0.528319	0.854259	0.0174887	-0.0186089	0.0535863	0.342331	0.939379	A	G
rs2102278	-0.0199984	-0.0501625	0.0101657	0.193797	0	0.771377	0.854259	-0.0240778	-0.0636979	0.0155423	0.233614	0.929148	A	G
rs11688931	0.0292767	-0.0149451	0.0734984	0.194432	0.725731	0.0069258	0.854259	0.0182709	-0.011679	0.0482207	0.231823	0.929148	C	G
rs4736819	0.0211122	-0.0107876	0.053012	0.194576	0	0.664608	0.854259	0.0466037	0.00479236	0.088415	0.0289173	0.771116	C	T
rs558308082	-0.000596361	-0.00150153	0.000308806	0.196598	0	0.463142	0.854259	-0.00117814	-0.00236101	4.72698e-06	0.0509226	0.771116	G	C
rs2820446	0.0199608	-0.0105144	0.050436	0.199231	0.061724	0.144293	0.854259	0.032704	-0.0194131	0.0848211	0.218736	0.929148	C	G
rs1562396	-0.0199936	-0.0509564	0.0109692	0.205653	0.104912	0.134968	0.854259	0.0254713	-0.0127165	0.0636592	0.191111	0.929148	A	G
rs12140153	0.0166251	-0.00927121	0.0425213	0.208294	0.502853	0.044885	0.854259	0.0104376	-0.0262001	0.0470754	0.576593	0.983637	G	T
rs56337234	-0.0214345	-0.0549841	0.0121152	0.210498	0	0.228783	0.854259	0.0126356	-0.0314429	0.0567141	0.574221	0.983637	C	T
rs145678014	-0.00826626	-0.0212193	0.00468679	0.21101	0	0.709841	0.854259	-0.00887696	-0.0258808	0.00812691	0.306209	0.939379	G	T
rs8046545	0.023759	-0.0137669	0.061285	0.214634	0.316871	0.0870713	0.854259	0.0463366	0.00613917	0.0865341	0.0238647	0.771116	G	A
rs2268078	-0.0191028	-0.0493049	0.0110993	0.215096	0	0.290505	0.854259	-0.0183084	-0.0580207	0.0214038	0.366209	0.939379	G	A
rs1042725	-0.0203154	-0.0524386	0.0118079	0.215153	0	0.594303	0.854259	-0.0154767	-0.0575982	0.0266448	0.471434	0.971205	C	T
rs4923543	0.0346441	-0.0203295	0.0896178	0.216771	0.687712	0.0113841	0.854259	0.0494628	-0.070109	0.169035	0.417497	0.939379	G	A
rs12680028	0.0202693	-0.0119768	0.0525155	0.21795	0	0.261337	0.854259	0.0513481	0.00904866	0.0936475	0.0173485	0.771116	C	G
rs76811102	0.00721529	-0.00433099	0.0187616	0.220656	0	0.26755	0.854259	0.00229488	-0.0288194	0.0334091	0.885058	0.991801	C	T
rs12802972	0.0196841	-0.0122119	0.0515801	0.226448	0	0.343507	0.854259	0.0336678	-0.00822053	0.0755562	0.115182	0.862225	G	A
rs10228066	0.0196833	-0.0123528	0.0517194	0.228505	0	0.656302	0.854259	-0.00155986	-0.0435483	0.0404285	0.941955	0.991801	C	T
rs150111048	-0.00156881	-0.00413764	0.00100001	0.231315	0	0.255879	0.854259	-0.000502923	-0.00390324	0.00289739	0.771902	0.985223	A	G
rs10830963	0.0247448	-0.0158665	0.0653562	0.232391	0.470271	0.0520079	0.854259	0.00937864	-0.0288109	0.0475682	0.630282	0.983637	C	G
rs17791513	0.00919313	-0.00613489	0.0245212	0.239792	0	0.274564	0.854259	0.00997719	-0.0153229	0.0352772	0.43957	0.950692	A	G
rs9873618	-0.0174534	-0.0466657	0.0117588	0.241591	0	0.226421	0.854259	-0.0157308	-0.0540572	0.0225956	0.421135	0.939379	G	A
rs1317617	-0.0155743	-0.0417389	0.0105903	0.243348	0	0.213957	0.854259	-0.0072538	-0.0415454	0.0270378	0.678437	0.983637	G	A
rs528350911	0.00352472	-0.00248613	0.00953558	0.250429	0.217796	0.109815	0.854259	0.00632384	-0.000381326	0.013029	0.0645301	0.771116	C	G
rs62059712	-0.00954989	-0.0258369	0.0067371	0.250463	0	0.473459	0.854259	0.00480112	-0.0166497	0.0262519	0.660894	0.983637	T	C
rs4771648	0.017807	-0.0125915	0.0482056	0.250919	0	0.505995	0.854259	0.0373743	-0.00571064	0.0804593	0.0890965	0.826167	G	A
rs3217860	0.0164848	-0.0117133	0.044683	0.251874	0.0978686	0.136501	0.854259	0.00113426	-0.0357573	0.0380258	0.951948	0.991801	A	G
rs528122639	-0.000651733	-0.00177114	0.000467674	0.253822	0	0.260542	0.854259	-0.000316762	-0.00207401	0.00144049	0.723861	0.983637	G	A
rs17689007	0.0184155	-0.0135589	0.0503898	0.258968	0	0.301782	0.854259	0.0181888	-0.0237656	0.0601432	0.395482	0.939379	G	A
rs7629630	0.0132198	-0.00979419	0.0362338	0.260228	0	0.469938	0.854259	0.0073649	-0.0227926	0.0375224	0.632187	0.983637	A	T
rs146886108	-0.00195613	-0.00536348	0.00145122	0.260504	0	0.805814	0.854259	-0.000803979	-0.00529911	0.00369116	0.725926	0.983637	C	T
rs557027608	-0.000460066	-0.00126354	0.000343413	0.261752	0	0.838327	0.854259	-0.000361744	-0.00142327	0.000699784	0.504191	0.983637	G	A
rs61676547	-0.0150798	-0.0415487	0.011389	0.264153	0	0.639077	0.854259	-0.0197627	-0.0565622	0.0170368	0.292537	0.938432	G	C
rs10893829	-0.0128033	-0.03529	0.00968341	0.264444	0	0.287391	0.854259	-0.00498719	-0.0344584	0.024484	0.740139	0.983637	T	C
rs9494624	0.0168241	-0.0128147	0.0464629	0.265902	0.00105724	0.15708	0.854259	0.025902	-0.0129667	0.0647706	0.191514	0.929148	A	G
rs1412234	-0.0222431	-0.0615384	0.0170521	0.26724	0.400435	0.0677894	0.854259	-0.00334465	-0.0426447	0.0359554	0.867525	0.991801	T	C
rs1043246	0.0114902	-0.00889545	0.0318759	0.269282	0	0.444456	0.854259	0.0113025	-0.0259425	0.0485476	0.551991	0.983637	C	G
rs112915006	-0.00763948	-0.0212061	0.00592716	0.269736	0	0.333761	0.854259	-0.0202186	-0.0431308	0.0026936	0.0837112	0.79917	A	G
rs1412830	0.0172706	-0.0134403	0.0479816	0.270372	0	0.287086	0.854259	0.0129669	-0.0272923	0.0532262	0.52786	0.983637	C	T
rs9430095	0.0207238	-0.01614	0.0575876	0.270532	0.222659	0.10871	0.854259	0.0244851	-0.0491834	0.0981536	0.514769	0.983637	C	G
rs555759341	-0.00137131	-0.00384084	0.00109822	0.27644	0	0.376966	0.854259	-0.00340886	-0.0066933	-0.000124414	0.0419307	0.771116	G	C
rs2982521	0.025831	-0.0207064	0.0723684	0.276641	0.522907	0.0406138	0.854259	-0.00592001	-0.0630829	0.0512429	0.83915	0.985223	A	T
rs71372253	-0.00768767	-0.0215608	0.00618547	0.277437	0	0.18815	0.854259	-0.00960678	-0.0278827	0.00866918	0.302889	0.939379	T	C
rs4776970	0.0172697	-0.0140026	0.048542	0.279091	0	0.16194	0.854259	0.0151012	-0.0258967	0.056099	0.470335	0.971205	A	T
rs11717959	-0.0171007	-0.0480786	0.0138772	0.279273	0	0.718336	0.854259	-0.0249522	-0.0655751	0.0156707	0.228633	0.929148	G	T
rs28525376	-0.0199554	-0.0564813	0.0165706	0.284261	0.233271	0.106293	0.854259	-0.0265981	-0.0941672	0.0409709	0.440394	0.950692	G	T
rs291367	-0.0221534	-0.0628422	0.0185353	0.285916	0.39983	0.0679282	0.854259	0.00993418	-0.0465054	0.0663738	0.730108	0.983637	G	A
rs11696357	0.00961879	-0.00809541	0.027333	0.287212	0.444297	0.0578127	0.854259	0.00220885	-0.0201319	0.0245496	0.846346	0.985223	A	G
rs4457053	-0.015815	-0.0451784	0.0135484	0.291138	0	0.170329	0.854259	-0.01434	-0.0529052	0.0242252	0.466131	0.971205	G	A
rs4977213	-0.0167387	-0.0478522	0.0143749	0.291684	0	0.194754	0.854259	-0.00185945	-0.0523343	0.0486154	0.94244	0.991801	C	T
rs117001013	-0.00911534	-0.0261384	0.00790769	0.293946	0	0.421405	0.854259	-0.0196751	-0.0420085	0.0026583	0.0842263	0.79917	C	T
rs329122	0.0247596	-0.0214824	0.0710016	0.293978	0.51249	0.0428203	0.854259	0.0287623	-0.0379975	0.0955222	0.398436	0.939379	G	A
rs10908278	-0.0171636	-0.0492719	0.0149446	0.294772	0	0.209089	0.854259	0.0111118	-0.0310137	0.0532373	0.605158	0.983637	T	A
rs2197973	0.0173393	-0.0151241	0.0498027	0.295167	0	0.815586	0.854259	0.0305516	-0.0119919	0.0730951	0.159279	0.928369	C	T
rs77464186	-0.0123265	-0.0354649	0.010812	0.296428	0	0.393493	0.854259	-0.0113334	-0.0568177	0.0341509	0.62529	0.983637	A	C
rs12920022	-0.012335	-0.0356966	0.0110266	0.300731	0	0.316518	0.854259	0.003116	-0.0276263	0.0338583	0.842529	0.985223	T	A
rs11708067	-0.0140229	-0.0406973	0.0126516	0.302841	0	0.168383	0.854259	-0.00394101	-0.0389283	0.0310463	0.82527	0.985223	A	G
rs77864822	0.00809252	-0.00731388	0.0234989	0.30324	0	0.263754	0.854259	0.00254885	-0.023236	0.0283337	0.846377	0.985223	A	G
rs6545714	0.0189803	-0.0172949	0.0552555	0.305122	0.237479	0.105333	0.854259	-0.00242247	-0.0585662	0.0537213	0.932605	0.991801	G	A
rs4932265	-0.0235543	-0.0687341	0.0216256	0.306867	0.582608	0.0285978	0.854259	-0.0304329	-0.10482	0.0439544	0.42264	0.939379	T	C
rs8010382	0.0167	-0.0154585	0.0488585	0.308767	0	0.240383	0.854259	0.0250283	-0.0196809	0.0697374	0.272558	0.938432	A	G
rs9379084	-0.00976472	-0.0286418	0.00911238	0.310656	0	0.301972	0.854259	-0.0160962	-0.0409265	0.00873407	0.20389	0.929148	G	A
rs562386202	0.000657849	-0.000626114	0.00194181	0.315281	0	0.24719	0.854259	0.000632891	-0.00106094	0.00232672	0.463967	0.971205	A	G
rs559138871	0.00110775	-0.00105842	0.00327392	0.3162	0	0.820058	0.854259	0.00213057	-0.00070997	0.00497112	0.141538	0.881105	C	T
rs7719891	0.0146958	-0.0140624	0.0434539	0.316553	0	0.173945	0.854259	-0.0014862	-0.0391874	0.036215	0.938414	0.991801	A	G
rs1061810	0.0148532	-0.014421	0.0441273	0.320004	0	0.182293	0.854959	0.018433	-0.0527676	0.0896336	0.611866	0.983637	C	A
rs76549217	-0.00721704	-0.021513	0.00707891	0.322443	0.517717	0.0417097	0.854959	-0.0106657	-0.0365762	0.0152448	0.419787	0.939379	C	T
rs8032939	0.0142547	-0.0140776	0.0425871	0.324079	0	0.887935	0.854959	0.0204313	-0.0167172	0.0575798	0.281052	0.938432	T	C
rs234853	-0.0140674	-0.0421811	0.0140462	0.32673	0	0.499534	0.854959	-0.00240832	-0.0393296	0.0345129	0.898271	0.991801	G	A
rs55653563	-0.0139082	-0.0419845	0.0141682	0.331595	0	0.524302	0.854959	-0.0188044	-0.0556238	0.018015	0.31683	0.939379	A	C
rs231361	0.0187715	-0.0191301	0.056673	0.331693	0.455458	0.0553069	0.854959	0.0300878	-0.00612763	0.0663032	0.103453	0.862225	G	A
rs6600191	0.0215426	-0.0220843	0.0651696	0.333137	0.677365	0.0127826	0.854959	0.0384753	0.00344388	0.0735068	0.0313466	0.771116	T	C
rs1333052	-0.0146138	-0.0446886	0.015461	0.340907	0	0.83643	0.854959	-0.0273615	-0.0667959	0.0120729	0.173856	0.929148	A	C
rs6063048	0.0181369	-0.019423	0.0556967	0.343931	0.412534	0.0650207	0.854959	0.0359662	-0.0084533	0.0803858	0.112519	0.862225	G	A
rs61850200	0.0136919	-0.0148728	0.0422566	0.347489	0	0.210132	0.854959	0.0106952	-0.0288605	0.050251	0.596151	0.983637	G	C
rs8037894	-0.0164865	-0.0509028	0.0179298	0.34779	0.130127	0.129442	0.854959	0.00498775	-0.0372439	0.0472194	0.816941	0.985223	G	C
rs10305745	0.00167314	-0.00183151	0.00517779	0.349429	0	0.296692	0.854959	0.00237635	-0.00218701	0.0069397	0.307424	0.939379	G	A
rs2238689	0.0243163	-0.0266536	0.0752861	0.349766	0.578419	0.0293998	0.854959	0.0228046	-0.0287618	0.074371	0.386068	0.939379	T	C
rs2028150	-0.017067	-0.0529088	0.0187748	0.350672	0.214112	0.110651	0.854959	-0.0143082	-0.0556064	0.0269901	0.497108	0.983637	C	G
rs862016	0.00757525	-0.00837811	0.0235286	0.352027	0	0.201766	0.854959	0.0109947	-0.012119	0.0341084	0.351174	0.939379	G	A
rs13041756	-0.00951561	-0.0296822	0.010651	0.355064	0	0.931786	0.854959	-0.00368474	-0.0301303	0.0227608	0.784786	0.985223	T	C
rs8017808	-0.0131302	-0.0410041	0.0147436	0.355871	0	0.261226	0.854959	-0.0248934	-0.0686917	0.0189049	0.26529	0.938432	G	T
rs10974438	0.0141493	-0.0162788	0.0445774	0.362084	0	0.373876	0.855758	0.00945113	-0.0304566	0.0493589	0.642528	0.983637	A	C
rs429358	-0.00987604	-0.0311806	0.0114285	0.363577	0	0.26764	0.855758	0.0230505	-0.00475654	0.0508575	0.104226	0.862225	T	C
rs560716466	-0.00120348	-0.00380675	0.00139979	0.364892	0.267484	0.0984599	0.855758	-0.000908867	-0.00530917	0.00349144	0.685607	0.983637	G	A
rs1903002	-0.0239403	-0.0763222	0.0284417	0.370377	0.610638	0.0234264	0.859031	-0.0220435	-0.0730201	0.0289331	0.396697	0.939379	C	G
rs12578639	-0.0112257	-0.0358217	0.0133704	0.371038	0	0.274749	0.859031	-0.0194753	-0.0517323	0.0127818	0.236677	0.929148	A	T
rs4810426	-0.00913716	-0.0292663	0.0109919	0.373636	0	0.16575	0.859031	-0.00749147	-0.0338812	0.0188982	0.577943	0.983637	C	T
rs12236906	-0.00293506	-0.00950767	0.00363756	0.381444	0	0.178671	0.859031	-0.00123836	-0.0139301	0.0114533	0.848339	0.985223	T	C
rs2237895	0.0143966	-0.0179077	0.0467009	0.382408	0	0.237892	0.859031	0.0120792	-0.0303163	0.0544747	0.576554	0.983637	A	C
rs35999103	-0.016235	-0.0527625	0.0202924	0.383685	0.571584	0.0307232	0.859031	-0.0152522	-0.0473453	0.016841	0.351613	0.939379	C	T
rs10842994	-0.0115347	-0.0375789	0.0145094	0.385365	0.0642601	0.14375	0.859031	-0.0122664	-0.0687681	0.0442353	0.670469	0.983637	C	T
rs62482405	0.00780106	-0.00983977	0.0254419	0.386091	0	0.289929	0.859031	0.003639	-0.019552	0.02683	0.758428	0.985223	T	G
rs9505097	-0.0153699	-0.050168	0.0194281	0.386657	0.439097	0.0589856	0.859031	0.00344155	-0.0313458	0.0382289	0.846253	0.985223	C	T
rs1800574	-0.0049213	-0.016097	0.00625438	0.38809	0	0.17913	0.859031	-0.00966566	-0.0242833	0.004952	0.194979	0.929148	C	T
rs3811978	0.010453	-0.0136248	0.0345308	0.394831	0	0.272204	0.864612	-0.000797579	-0.0324077	0.0308126	0.960558	0.992171	A	G
rs60276348	-0.00890183	-0.0294139	0.0116103	0.395	0.0308089	0.150856	0.864612	-0.0270242	-0.0535244	-0.000523945	0.0456392	0.771116	C	T
rs1112718	-0.0218262	-0.0725733	0.0289208	0.39924	0.608409	0.0238243	0.869065	-0.0365395	-0.102931	0.0298518	0.280723	0.938432	A	G
rs62368490	-0.00751593	-0.0252804	0.0102485	0.406971	0.61281	0.0230409	0.881024	-0.0144259	-0.0471556	0.0183039	0.387661	0.939379	C	T
rs11688682	0.0114375	-0.0157475	0.0386225	0.40959	0	0.643267	0.881125	0.0241417	-0.0173651	0.0656486	0.254295	0.938432	G	C
rs279744	-0.0125966	-0.0426584	0.0174651	0.41149	0	0.391767	0.881125	-0.00734731	-0.0682758	0.0535812	0.813161	0.985223	C	A
rs3217792	-0.0116645	-0.0399431	0.0166141	0.418829	0.662569	0.0149094	0.8887	-0.0010029	-0.0222499	0.0202441	0.926289	0.991801	C	T
rs77136196	0.0081926	-0.0118813	0.0282665	0.423766	0.548858	0.0352465	0.8887	0.00397802	-0.0165375	0.0244936	0.703914	0.983637	C	T
rs184509201	-0.00355711	-0.0124211	0.00530688	0.431556	0.240047	0.104747	0.8887	0.00137103	-0.00848975	0.0112318	0.785229	0.985223	C	G
rs6821438	-0.0128993	-0.0452583	0.0194597	0.434625	0	0.627	0.8887	0.0188451	-0.0235949	0.0612851	0.384135	0.939379	A	G
rs6070625	0.0287029	-0.0436972	0.101103	0.437144	0.794711	0.00180068	0.8887	0.0379285	-0.0598869	0.135744	0.447262	0.955954	C	G
rs2233632	0.0117543	-0.0179038	0.0414124	0.437285	0	0.285455	0.8887	-0.0108349	-0.0521892	0.0305195	0.607593	0.983637	C	T
rs7987740	0.0182464	-0.0278691	0.0643619	0.438048	0.521113	0.0409919	0.8887	0.0238302	-0.0333464	0.0810069	0.413998	0.939379	T	C
rs191830490	0.00152657	-0.0023404	0.00539355	0.439085	0	0.27538	0.8887	0.00375271	-0.00135569	0.0088611	0.149919	0.886476	G	A
rs114447556	-0.00650374	-0.0232857	0.0102783	0.447512	0.0526339	0.146233	0.8887	0.00440024	-0.0169376	0.0257381	0.686081	0.983637	C	T
rs76895963	-0.00402107	-0.0145634	0.00652127	0.454718	0.577352	0.0296053	0.8887	-0.00346034	-0.0123894	0.0054687	0.447518	0.955954	T	G
rs2456530	-0.00825353	-0.0299373	0.0134303	0.455653	0	0.233696	0.8887	-0.00458048	-0.0330588	0.0238978	0.752577	0.985223	C	T
rs180988137	0.00234977	-0.00383043	0.00852997	0.456154	0	0.578627	0.8887	-0.000427772	-0.00859332	0.00773778	0.918219	0.991801	A	G
rs6780171	-0.0114446	-0.0417975	0.0189083	0.459903	0	0.17137	0.8887	-0.0143842	-0.0542163	0.025448	0.479081	0.972462	T	A
rs1377807	0.0111827	-0.0185629	0.0409283	0.461222	0	0.347646	0.8887	0.0270061	-0.0120076	0.0660199	0.174868	0.929148	G	C
rs17802463	0.0150958	-0.0250727	0.0552643	0.461379	0.482537	0.0493028	0.8887	0.0132923	-0.0417536	0.0683382	0.636011	0.983637	G	T
rs35352848	-0.0151121	-0.0553263	0.0251021	0.461405	0.56867	0.031293	0.8887	-0.0277857	-0.0682415	0.0126702	0.17826	0.929148	T	C
rs140242150	0.00231305	-0.0038572	0.00848331	0.462501	0.750605	0.00462784	0.8887	-7.61621e-05	-0.00525637	0.00510405	0.977011	0.997916	G	A
rs9563615	0.0110502	-0.0184636	0.0405641	0.463054	0	0.167801	0.8887	0.0120858	-0.0361502	0.0603217	0.623371	0.983637	A	T
rs76197067	-2.19073e-05	-8.05342e-05	3.67197e-05	0.463934	0	0.568597	0.8887	6.85065e-06	-6.91752e-05	8.28765e-05	0.859814	0.990972	A	G
rs2052261	0.0150151	-0.0251778	0.0552079	0.46405	0.445717	0.0574931	0.8887	0.000171014	-0.0437174	0.0440595	0.993907	0.997916	G	A
rs1127215	0.0226748	-0.0381653	0.083515	0.465103	0.719959	0.00753073	0.8887	0.0213744	-0.0443522	0.0871009	0.523875	0.983637	C	T
rs1005752	-0.0160371	-0.0593232	0.0272489	0.467747	0.53279	0.0385469	0.8887	-0.0410049	-0.0792204	-0.00278934	0.0354639	0.771116	C	A
rs62271373	-0.00510832	-0.0189164	0.00869973	0.468395	0	0.244775	0.8887	-0.00717693	-0.0253333	0.0109795	0.438493	0.950692	T	A
rs3772071	-0.0107035	-0.0396855	0.0182785	0.469161	0	0.30563	0.8887	-0.00380725	-0.0418622	0.0342477	0.844542	0.985223	C	T
rs116913033	-0.00968964	-0.0362073	0.016828	0.473882	0.237419	0.105347	0.893347	0.00109316	-0.0332437	0.03543	0.950246	0.991801	C	T
rs11820019	-0.00554101	-0.0208047	0.00972269	0.476772	0.59976	0.0253912	0.893613	-0.00918519	-0.0223353	0.00396492	0.170996	0.929148	T	C
rs11063028	-0.010907	-0.0411325	0.0193184	0.479401	0.301132	0.0907075	0.893613	-0.000958965	-0.0337286	0.0318107	0.954262	0.991801	T	C
rs56348580	-0.0141191	-0.0536536	0.0254155	0.483948	0.422201	0.0628167	0.893613	-0.010091	-0.0593066	0.0391246	0.687785	0.983637	G	C
rs76251711	0.00239087	-0.0043946	0.00917634	0.489819	0	0.670237	0.893613	0.000688157	-0.0082848	0.00966112	0.880517	0.991801	A	G
rs11680058	-0.00604715	-0.0232279	0.0111336	0.490287	0	0.411812	0.893613	-0.006607	-0.0291899	0.0159759	0.56636	0.983637	G	A
rs1359790	0.0124483	-0.0229964	0.0478929	0.491235	0.337758	0.0822412	0.893613	0.0228957	-0.0144241	0.0602155	0.229193	0.929148	G	A
rs35497231	-0.0106736	-0.0410686	0.0197213	0.491283	0	0.249224	0.893613	-0.00982553	-0.0605599	0.0409089	0.704258	0.983637	C	T
rs2972144	-0.010653	-0.0410511	0.0197452	0.492168	0	0.327772	0.893613	0.00234659	-0.0374759	0.0421691	0.908054	0.991801	A	G
rs72802342	0.00540775	-0.010529	0.0213445	0.506009	0	0.71749	0.914529	0.00237827	-0.0185374	0.023294	0.823642	0.985223	C	A
rs11202627	-0.00787287	-0.031218	0.0154722	0.508628	0	0.27979	0.915066	-0.0117764	-0.053578	0.0300252	0.580836	0.983637	C	T
rs2800733	-0.016504	-0.0657758	0.0327678	0.511498	0.649615	0.0168877	0.915159	-0.0241496	-0.0818536	0.0335544	0.412068	0.939379	A	G
rs4148856	-0.00872511	-0.0349121	0.0174619	0.513737	0	0.216361	0.915159	-0.0046197	-0.0504987	0.0412593	0.84355	0.985223	G	C
rs10193538	-0.0196738	-0.0795064	0.0401589	0.519276	0.715823	0.00798037	0.915159	-0.0316887	-0.0727357	0.00935838	0.130252	0.862225	G	T
rs17836088	0.0208832	-0.0429168	0.0846831	0.521171	0.812172	0.00110188	0.915159	0.0123584	-0.0618291	0.086546	0.744047	0.985223	G	C
rs2258238	-0.00650889	-0.0264307	0.0134129	0.521937	0	0.371822	0.915159	-0.00304773	-0.029205	0.0231095	0.819361	0.985223	A	T
rs117483894	0.00391739	-0.0080922	0.015927	0.522616	0	0.176298	0.915159	-0.00245352	-0.0182203	0.0133133	0.760369	0.985223	A	G
rs4686471	0.00998544	-0.0211826	0.0411535	0.530055	0	0.351904	0.920403	0.00985937	-0.0438284	0.0635472	0.718897	0.983637	T	C
rs7978610	0.00965733	-0.0205485	0.0398631	0.530898	0	0.225053	0.920403	-0.0235608	-0.0631783	0.0160567	0.243774	0.9378	G	C
rs11786992	0.0136719	-0.0295329	0.0568766	0.535114	0.487487	0.0482189	0.920403	0.0376868	-0.0312908	0.106664	0.284236	0.938432	A	C
rs10469140	-0.00996229	-0.0421088	0.0221842	0.543586	0	0.407269	0.920403	-0.0126461	-0.0548082	0.0295161	0.55662	0.983637	A	G
rs649961	-0.00986118	-0.0418591	0.0221368	0.545827	0	0.232016	0.920403	0.00781824	-0.0341216	0.0497581	0.714837	0.983637	T	C
rs2581787	0.00993325	-0.0223639	0.0422304	0.546639	0	0.408723	0.920403	0.00255511	-0.0398244	0.0449346	0.905934	0.991801	G	T
rs17819328	0.0174585	-0.039328	0.0742451	0.546792	0.671676	0.0135831	0.920403	0.0124022	-0.0703997	0.095204	0.76909	0.985223	T	G
rs3798519	-0.00761513	-0.0324662	0.017236	0.548112	0	0.159006	0.920403	0.00833653	-0.0384874	0.0551605	0.727125	0.983637	A	C
rs7645517	-0.00422978	-0.018256	0.00979643	0.554486	0	0.884204	0.920403	-0.000616807	-0.0190133	0.0177797	0.947605	0.991801	G	A
rs67254669	0.00140875	-0.00327265	0.00609014	0.555323	0.706943	0.00899104	0.920403	0.00121002	-0.00361865	0.00603869	0.623321	0.983637	A	G
rs445084	0.0137434	-0.0320231	0.0595099	0.556153	0.506047	0.0441983	0.920403	-0.0200006	-0.0614767	0.0214756	0.344592	0.939379	A	G
rs231349	-0.00510677	-0.022162	0.0119484	0.557294	0	0.592831	0.920403	0.000128135	-0.0223145	0.0225708	0.991072	0.997916	C	T
rs79103584	-0.00207131	-0.00901632	0.00487369	0.55885	0	0.298126	0.920403	-0.00491772	-0.0139996	0.00416414	0.288555	0.938432	T	A
rs3768321	-0.0078267	-0.0345703	0.0189169	0.566241	0	0.304755	0.920403	0.0213372	-0.0306367	0.073311	0.421029	0.939379	G	T
rs1531583	-0.0075795	-0.0335074	0.0183484	0.566674	0.711696	0.00844244	0.920403	-0.00567538	-0.0358826	0.0245318	0.712693	0.983637	G	T
rs2189301	-0.00721994	-0.0320012	0.0175613	0.56798	0.258878	0.100436	0.920403	-0.021151	-0.0487788	0.00647688	0.133489	0.862225	G	A
rs17122772	-0.00848312	-0.0376688	0.0207025	0.568892	0.168247	0.120982	0.920403	-0.0279336	-0.0857422	0.029875	0.343602	0.939379	C	G
rs115505614	0.00875249	-0.0214001	0.0389051	0.569407	0.750434	0.00464194	0.920403	0.000373226	-0.0186794	0.0194259	0.969373	0.997916	C	T
rs718314	0.0081001	-0.0198476	0.0360478	0.569995	0	0.265614	0.920403	-0.00197189	-0.038602	0.0346582	0.915971	0.991801	A	G
rs11793035	-0.00857118	-0.0383596	0.0212173	0.572788	0	0.305383	0.92061	-0.00199429	-0.0411389	0.0371504	0.920461	0.991801	C	T
rs34855406	-0.0106104	-0.0476819	0.026461	0.574816	0.353596	0.0785796	0.92061	0.0034927	-0.0442659	0.0512513	0.886024	0.991801	G	C
rs244665	-0.00814135	-0.037256	0.0209733	0.583647	0	0.168103	0.92061	0.00434092	-0.0338537	0.0425355	0.823726	0.985223	G	A
rs9569864	0.00684574	-0.0180355	0.031727	0.589709	0	0.33775	0.92061	0.00967003	-0.0355285	0.0548686	0.674978	0.983637	C	T
rs3887925	0.0087372	-0.0232831	0.0407575	0.592785	0	0.488495	0.92061	-0.00213926	-0.0441459	0.0398673	0.920491	0.991801	C	T
rs57327348	0.00713095	-0.019049	0.0333109	0.593438	0	0.452965	0.92061	0.0210879	-0.0133166	0.0554924	0.229618	0.929148	A	T
rs10811660	0.00622613	-0.0166958	0.029148	0.594468	0.0132485	0.15454	0.92061	0.0236795	-0.00614984	0.0535088	0.119736	0.862225	G	A
rs1708302	0.00862432	-0.0232879	0.0405365	0.596332	0	0.638643	0.92061	0.0193508	-0.0224742	0.0611758	0.364514	0.939379	C	T
rs9537803	0.0139666	-0.0377439	0.0656771	0.596548	0.660082	0.015281	0.92061	0.0199391	-0.0375891	0.0774672	0.496937	0.983637	C	T
rs10097617	-0.00871521	-0.041045	0.0236146	0.597255	0	0.15784	0.92061	0.0115483	-0.0308819	0.0539785	0.593726	0.983637	T	C
rs11070332	0.00825245	-0.0224946	0.0389995	0.598853	0	0.470974	0.92061	0.0168843	-0.0234636	0.0572321	0.412113	0.939379	G	A
rs10848958	-0.00653197	-0.0310473	0.0179834	0.601516	0.151288	0.124761	0.92061	0.0132469	-0.0159433	0.042437	0.373756	0.939379	C	T
rs6976111	0.00813916	-0.022488	0.0387663	0.602464	0	0.21397	0.92061	5.35223e-05	-0.0401189	0.040226	0.997916	0.997916	C	A
rs2272163	0.00841161	-0.0233505	0.0401738	0.603719	0	0.361328	0.92061	-0.00828298	-0.0670576	0.0504917	0.782384	0.985223	C	A
rs2280141	-0.0106548	-0.0510493	0.0297397	0.605172	0.342603	0.0811209	0.92061	-0.0392147	-0.0815827	0.00315328	0.0696636	0.771116	T	G
rs75423501	-0.00504811	-0.0243627	0.0142664	0.608467	0.094874	0.137151	0.922062	-0.0129999	-0.0369535	0.0109537	0.287466	0.938432	A	G
rs2237897	-0.00301586	-0.0149356	0.00890385	0.619965	0	0.162219	0.934142	0.0100508	-0.0136628	0.0337644	0.406134	0.939379	C	T
rs11042596	0.00878084	-0.0260988	0.0436605	0.621719	0.227892	0.107519	0.934142	0.018246	-0.0215527	0.0580448	0.368887	0.939379	T	G
rs3934712	-0.00881683	-0.0441521	0.0265184	0.624807	0.426709	0.0617917	0.934142	-0.0136403	-0.0609759	0.0336952	0.572217	0.983637	T	C
rs80244329	-0.00199915	-0.0100692	0.00607085	0.627298	0	0.449148	0.934142	0.0044328	-0.00616063	0.0150262	0.412135	0.939379	G	A
rs141521721	0.00224994	-0.00685876	0.0113586	0.628293	0	0.697821	0.934142	0.00548224	-0.00648103	0.0174455	0.369097	0.939379	C	A
rs28638142	-0.00325062	-0.0166498	0.0101486	0.634442	0	0.540049	0.939455	-0.0111272	-0.0286816	0.00642724	0.214104	0.929148	C	A
rs10750397	0.00711806	-0.0224139	0.0366501	0.636636	0	0.400514	0.939455	0.041348	0.00261685	0.0800792	0.0364038	0.771116	A	G
rs4709746	-0.00513721	-0.0267406	0.0164662	0.641163	0	0.284433	0.940783	-0.00204913	-0.0303935	0.0262953	0.887322	0.991801	C	T
rs11496066	-0.00577752	-0.0301575	0.0186024	0.642311	0	0.164977	0.940783	0.00529153	-0.0312555	0.0418386	0.776582	0.985223	T	C
rs9860730	0.00986959	-0.0326882	0.0524274	0.649443	0.499452	0.0456187	0.94222	0.00872782	-0.054346	0.0718017	0.78623	0.985223	A	G
rs10882101	-0.0153005	-0.0813112	0.0507103	0.649616	0.7649	0.00353779	0.94222	-0.0121404	-0.0920873	0.0678064	0.765984	0.985223	T	C
rs187936726	0.00208822	-0.00694446	0.0111209	0.650466	0	0.868535	0.94222	-0.00140824	-0.0185467	0.0157302	0.872057	0.991801	A	G
rs34584161	-0.0090177	-0.0489968	0.0309614	0.658424	0.536898	0.0376957	0.94321	-0.00412999	-0.0451524	0.0368924	0.843576	0.985223	A	G
rs148766658	0.00263946	-0.00941241	0.0146913	0.667743	0	0.849321	0.94321	0.0037289	-0.0121173	0.0195751	0.644644	0.983637	T	C
rs34298980	-0.00762948	-0.0429612	0.0277023	0.672126	0.184287	0.117387	0.94321	-0.0367346	-0.0906973	0.0172281	0.18213	0.929148	T	C
rs6459733	-0.0063729	-0.0361014	0.0233556	0.67437	0	0.517482	0.94321	0.00879588	-0.0349076	0.0524993	0.693236	0.983637	G	C
rs13426680	0.00561971	-0.0206853	0.0319247	0.675421	0.610317	0.0234836	0.94321	0.00680355	-0.0143093	0.0279164	0.527654	0.983637	A	G
rs62080313	-0.00432336	-0.0249741	0.0163273	0.681563	0	0.43697	0.94321	-0.0225309	-0.0496648	0.00460295	0.103635	0.862225	T	C
rs571342427	-0.000330571	-0.00192735	0.00126621	0.68492	0	0.418245	0.94321	-0.00104441	-0.00312261	0.00103379	0.324628	0.939379	T	C
rs96844	0.00811503	-0.031134	0.0473641	0.685303	0.449098	0.0567329	0.94321	0.0396196	0.00194291	0.0772963	0.0392997	0.771116	G	A
rs12048743	0.00659817	-0.0257858	0.0389821	0.689643	0	0.771659	0.94321	0.0185383	-0.0239621	0.0610387	0.392595	0.939379	C	G
rs576674	-0.00485963	-0.0288962	0.019177	0.691914	0	0.665008	0.94321	0.00723375	-0.0242954	0.0387629	0.652944	0.983637	G	A
rs825452	-0.00632568	-0.0379726	0.0253212	0.695233	0	0.607453	0.94321	0.0307128	-0.0107803	0.0722059	0.146851	0.881105	G	A
rs4279506	0.00620962	-0.0249348	0.0373541	0.69596	0	0.602563	0.94321	0.000246306	-0.0422473	0.0427399	0.990936	0.997916	G	C
rs1260326	-0.0101492	-0.0617178	0.0414193	0.699688	0.626387	0.0206851	0.94321	-0.0171534	-0.0639242	0.0296175	0.472249	0.971205	T	C
rs79687284	0.00195553	-0.00805689	0.011968	0.701867	0	0.58642	0.94321	-0.0137401	-0.0269198	-0.000560357	0.0410233	0.771116	G	C
rs348330	0.00583743	-0.0241555	0.0358303	0.70286	0	0.391104	0.94321	-0.00101649	-0.0403221	0.0382891	0.959575	0.992171	G	A
rs72631105	-0.00477353	-0.0295078	0.0199608	0.705239	0	0.531354	0.94321	0.0020292	-0.0305132	0.0345716	0.902729	0.991801	G	A
rs3115960	-0.00948919	-0.059081	0.0401026	0.707637	0.59426	0.0264055	0.94321	0.0229815	-0.0176589	0.0636218	0.26772	0.938432	G	C
rs5758223	0.0105784	-0.0454245	0.0665814	0.71122	0.725834	0.00691522	0.94321	0.0159983	-0.0507644	0.082761	0.638595	0.983637	G	A
rs199795270	0.00122077	-0.00525661	0.00769815	0.711838	0.488759	0.0479411	0.94321	0.00393539	-0.00270253	0.0105733	0.245238	0.9378	G	C
rs11699802	0.00604224	-0.0262253	0.0383098	0.71361	0	0.425348	0.94321	0.017175	-0.0252013	0.0595513	0.426981	0.941667	C	T
rs62107261	0.00204219	-0.0091391	0.0132235	0.720362	0	0.334142	0.94321	-0.00519097	-0.0215104	0.0111285	0.532999	0.983637	T	C
rs1796330	-0.00582897	-0.0378979	0.02624	0.721653	0	0.432044	0.94321	-0.00043747	-0.0504166	0.0495417	0.986312	0.997916	G	C
rs78020297	-0.00240206	-0.0158716	0.0110675	0.726695	0.000746573	0.157144	0.94321	0.00378471	-0.0177602	0.0253296	0.730621	0.983637	G	A
rs34965774	-0.00580818	-0.038769	0.0271526	0.729812	0.516537	0.0419598	0.94321	-0.0184773	-0.0637393	0.0267846	0.423642	0.939379	G	A
rs1296328	0.0056094	-0.0264971	0.0377159	0.732028	0	0.372451	0.94321	-0.00644244	-0.0485789	0.035694	0.76443	0.985223	A	C
rs56376556	-0.00303523	-0.0204151	0.0143446	0.732133	0.411033	0.0653636	0.94321	-0.00346264	-0.0232676	0.0163423	0.731844	0.983637	C	T
rs1316776	-0.00532485	-0.035841	0.0251913	0.732351	0	0.710603	0.94321	-0.018848	-0.0785725	0.0408765	0.536227	0.983637	C	A
rs12811407	0.0156655	-0.0741883	0.105519	0.73257	0.876616	5.67074e-05	0.94321	0.00446384	-0.103722	0.112649	0.935545	0.991801	G	A
rs1426371	-0.00476727	-0.0322515	0.022717	0.733883	0	0.280288	0.94321	0.0251421	-0.0133683	0.0636524	0.200688	0.929148	G	A
rs536643418	-0.000388493	-0.00262971	0.00185273	0.734052	0	0.29101	0.94321	-0.00030168	-0.00324241	0.00263905	0.840646	0.985223	C	G
rs7078559	0.00740269	-0.0354431	0.0502484	0.734886	0.434778	0.059962	0.94321	0.0323017	-0.0227431	0.0873465	0.250079	0.938432	C	T
rs2283164	-0.0022693	-0.0155137	0.0109751	0.737006	0	0.165753	0.94321	-0.00302992	-0.0204347	0.0143748	0.732952	0.983637	A	G
rs17772814	0.00265034	-0.0128432	0.0181439	0.737419	0.0652864	0.143531	0.94321	0.00433644	-0.0152311	0.023904	0.664031	0.983637	G	A
rs1801212	0.00580433	-0.0284103	0.0400189	0.739514	0.289865	0.0933075	0.94321	0.00822568	-0.0291864	0.0456377	0.666518	0.983637	G	A
rs3845281	-0.00307175	-0.0213955	0.015252	0.742485	0	0.508607	0.94321	-0.0134581	-0.0375373	0.0106211	0.273324	0.938432	G	A
rs34454109	0.0055285	-0.0275461	0.0386031	0.743205	0.344208	0.0807498	0.94321	0.0186333	-0.0161287	0.0533953	0.293447	0.938432	A	T
rs963740	-0.00947565	-0.0663151	0.0473638	0.743862	0.732657	0.00623524	0.94321	0.00489695	-0.0328545	0.0426484	0.799312	0.985223	A	T
rs62357230	-0.00185981	-0.013043	0.00932336	0.744462	0	0.873086	0.94321	-0.00381815	-0.018469	0.0108327	0.609502	0.983637	G	A
rs7178762	0.00538181	-0.0269862	0.0377498	0.744514	0	0.416371	0.94321	-0.00619264	-0.0486663	0.036281	0.77506	0.985223	C	T
rs1493694	0.00464918	-0.0242848	0.0335832	0.752814	0.501386	0.0452012	0.947535	0.00212234	-0.0476239	0.0518685	0.93336	0.991801	C	T
rs74452128	0.00149153	-0.0078125	0.0107956	0.753368	0.13645	0.128047	0.947535	-0.00909548	-0.0207308	0.00253984	0.12549	0.862225	C	A
rs28819812	-0.00973747	-0.0715148	0.0520399	0.757372	0.744752	0.00512294	0.947535	-0.00681917	-0.0549219	0.0412836	0.781128	0.985223	C	A
rs576406049	0.000230899	-0.00123508	0.00169688	0.757547	0.374319	0.0737953	0.947535	0.000304259	-0.00230409	0.00291261	0.81916	0.985223	C	T
rs59944054	-0.00427214	-0.0320705	0.0235263	0.763252	0	0.41597	0.948764	0.0027189	-0.0435131	0.0489509	0.908235	0.991801	G	A
rs4930091	-0.00422001	-0.0316983	0.0232583	0.763412	0	0.335342	0.948764	-0.00280954	-0.042329	0.0367099	0.889182	0.991801	T	C
rs2796441	0.00781039	-0.0435704	0.0591912	0.765754	0.621174	0.0215783	0.948764	-0.00328962	-0.0877692	0.08119	0.939164	0.991801	G	A
rs2268382	-0.00456126	-0.0351315	0.026009	0.769952	0	0.583309	0.949475	-0.00497769	-0.0488174	0.038862	0.823894	0.985223	A	C
rs6011155	0.00458378	-0.0263025	0.0354701	0.771147	0	0.429796	0.949475	-0.008713	-0.0492208	0.0317948	0.673334	0.983637	T	C
rs6885132	0.00482089	-0.0283064	0.0379481	0.775471	0.664534	0.0146186	0.950674	0.0192576	-0.00866202	0.0471773	0.176411	0.929148	C	G
rs10937721	0.00492699	-0.0291596	0.0390136	0.776947	0.154672	0.124009	0.950674	0.00142185	-0.0393835	0.0422272	0.945551	0.991801	G	C
rs2283220	-0.00393995	-0.0318036	0.0239237	0.781672	0	0.396956	0.95307	-0.0280138	-0.0646616	0.00863412	0.134081	0.862225	A	G
rs1580278	-0.00424218	-0.034924	0.0264396	0.786397	0	0.555472	0.95307	-0.00594618	-0.0520582	0.0401659	0.80047	0.985223	C	A
rs510807	0.00773293	-0.049407	0.0648729	0.790818	0.675086	0.0131006	0.95307	0.0143545	-0.0521325	0.0808415	0.672182	0.983637	C	A
rs35913461	0.00318427	-0.0203483	0.0267168	0.790848	0	0.558159	0.95307	-0.0102452	-0.0472093	0.0267189	0.586968	0.983637	C	T
rs7918400	-0.00707089	-0.0601128	0.045971	0.793878	0.611098	0.0233445	0.95307	-0.0155489	-0.104435	0.0733372	0.731705	0.983637	T	C
rs62492368	-0.00399233	-0.0340878	0.0261032	0.794864	0	0.511729	0.95307	0.00336583	-0.0360984	0.04283	0.867243	0.991801	G	A
rs66477705	0.00133495	-0.0087774	0.0114473	0.795838	0	0.350852	0.95307	-0.00794169	-0.0255548	0.0096714	0.376835	0.939379	T	C
rs539515	0.00333283	-0.0227375	0.0294032	0.802153	0	0.210256	0.953881	0.0087304	-0.0254458	0.0429066	0.616598	0.983637	A	C
rs17522122	0.00411187	-0.0282721	0.0364958	0.803468	0.0355538	0.149855	0.953881	0.0199659	-0.0216517	0.0615835	0.347071	0.939379	G	T
rs11709077	0.0026972	-0.0185794	0.0239739	0.803778	0	0.296121	0.953881	0.0060054	-0.0218716	0.0338824	0.672861	0.983637	G	A
rs2465043	0.00346603	-0.027454	0.034386	0.8261	0	0.289463	0.975511	0.00335677	-0.0404947	0.0472082	0.880739	0.991801	G	A
rs6708643	-0.00609229	-0.0613998	0.0492152	0.829069	0.648326	0.0170902	0.975511	-0.0119639	-0.0546602	0.0307324	0.582869	0.983637	G	A
rs3751837	-0.00293394	-0.0296489	0.023781	0.829571	0	0.466784	0.975511	-0.0220224	-0.0570789	0.0130341	0.218231	0.929148	C	T
rs703972	-0.00347383	-0.0357016	0.0287539	0.832681	0	0.448609	0.975511	-0.00747436	-0.0497487	0.0347999	0.728942	0.983637	G	C
rs569511541	-5.21419e-06	-5.47701e-05	4.43417e-05	0.836616	0	0.164045	0.975511	4.43726e-05	-2.10152e-05	0.00010976	0.183504	0.929148	A	G
rs2767036	0.00309947	-0.0267806	0.0329795	0.838894	0	0.590319	0.975511	-6.80263e-05	-0.0392579	0.0391218	0.997285	0.997916	C	A
rs7867635	0.00321908	-0.0279003	0.0343385	0.839335	0	0.287139	0.975511	0.0178836	-0.0384572	0.0742244	0.533858	0.983637	T	C
rs41277236	0.00163701	-0.0145087	0.0177827	0.842481	0.484355	0.0489043	0.976287	0.00623942	-0.013335	0.0258138	0.532137	0.983637	C	T
rs11926707	0.00299288	-0.0276701	0.0336559	0.848288	0	0.484414	0.977646	0.0109382	-0.0293199	0.0511964	0.594361	0.983637	T	C
rs8107974	0.00303481	-0.0283282	0.0343978	0.84958	0.667363	0.0142045	0.977646	-0.00626005	-0.0297134	0.0171933	0.600874	0.983637	A	T
rs2727301	0.00466934	-0.044278	0.0536167	0.851683	0.66014	0.0152723	0.977646	0.000267883	-0.0591224	0.0596581	0.992946	0.997916	T	C
rs1516728	0.0034495	-0.0331843	0.0400833	0.853579	0.424628	0.0622647	0.977646	-0.000724648	-0.044874	0.0434247	0.974336	0.997916	T	A
rs58432198	0.00321439	-0.0317213	0.0381501	0.85689	0.666767	0.0142912	0.978594	0.0100089	-0.0349071	0.0549249	0.662292	0.983637	C	T
rs543786825	-7.66467e-05	-0.000929407	0.000776114	0.860166	0	0.560002	0.979495	-6.9917e-05	-0.00120107	0.00106124	0.903576	0.991801	C	T
rs505922	0.00395744	-0.0417115	0.0496264	0.865136	0.542882	0.0364648	0.979841	-0.0386113	-0.0977376	0.020515	0.200575	0.929148	T	C
rs35654957	-0.00272037	-0.034186	0.0287453	0.865444	0	0.600695	0.979841	-0.0118533	-0.0531648	0.0294582	0.573869	0.983637	T	C
rs4688760	-0.00248637	-0.0327032	0.0277304	0.871877	0	0.518793	0.981288	0.00591495	-0.0337189	0.0455488	0.7699	0.985223	C	T
rs3111316	-0.00299456	-0.0395347	0.0335456	0.872389	0.237583	0.105309	0.981288	-0.00759819	-0.0490899	0.0338936	0.719655	0.983637	G	A
rs80102379	-0.000523997	-0.00709486	0.00604687	0.875798	0	0.163323	0.981288	-0.00166109	-0.0104955	0.00717335	0.712485	0.983637	G	T
rs112498319	0.00365053	-0.043685	0.0509861	0.879855	0.519863	0.0412558	0.981288	0.0337125	-0.00879822	0.0762233	0.120108	0.862225	C	A
rs17013314	0.000806919	-0.00972844	0.0113423	0.880673	0	0.430358	0.981288	0.00772884	-0.00603224	0.0214899	0.270982	0.938432	A	G
rs74653713	-0.000899307	-0.0127401	0.0109415	0.881665	0	0.328438	0.981288	-0.00938426	-0.0271186	0.00835004	0.299674	0.939379	C	A
rs17168486	-0.00177358	-0.0267892	0.0232421	0.889483	0	0.169596	0.98523	-0.00887338	-0.0416344	0.0238876	0.595516	0.983637	C	T
rs2249105	-0.00257833	-0.0391867	0.03403	0.890208	0.273882	0.0969888	0.98523	0.0180656	-0.025053	0.0611841	0.411548	0.939379	A	G
rs17684074	0.00421011	-0.0577576	0.0661778	0.894066	0.778645	0.00264819	0.985774	0.0172713	-0.0679385	0.102481	0.69117	0.983637	G	C
rs12454712	0.00178154	-0.025627	0.0291901	0.898626	0	0.73103	0.985774	-0.00388121	-0.0402432	0.0324808	0.83429	0.985223	T	C
rs4925109	0.00313578	-0.0472668	0.0535384	0.902948	0.635911	0.019091	0.985774	0.000391891	-0.0447137	0.0454975	0.986414	0.997916	A	G
rs111827885	0.000325196	-0.00500173	0.00565212	0.90476	0	0.602008	0.985774	-0.0013796	-0.00840613	0.00564694	0.70037	0.983637	T	C
rs11759026	-0.00168372	-0.0295757	0.0262082	0.905818	0	0.344733	0.985774	-0.0122888	-0.0488121	0.0242345	0.509601	0.983637	A	G
rs2307111	0.00241823	-0.0382919	0.0431283	0.907316	0.384352	0.071484	0.985774	-0.00398311	-0.0452618	0.0372956	0.849997	0.985223	T	C
rs74368513	0.000142801	-0.00228482	0.00257042	0.908214	0	0.305464	0.985774	4.68893e-05	-0.00335876	0.00345254	0.978472	0.997916	G	A
rs1561927	0.00227509	-0.0376599	0.0422101	0.911094	0.486389	0.0484589	0.986184	0.0160887	-0.0383147	0.0704922	0.562171	0.983637	C	T
rs549498088	-0.000118774	-0.0024337	0.00219615	0.919899	0.321529	0.0859944	0.989678	-0.00178971	-0.00731892	0.0037395	0.525815	0.983637	C	T
rs2908334	0.00208415	-0.0391896	0.0433579	0.921162	0.41444	0.0645856	0.989678	-0.000877669	-0.0689604	0.067205	0.979843	0.997916	C	T
rs76011118	-0.000511147	-0.0107241	0.00970179	0.921858	0	0.945985	0.989678	-0.00277206	-0.0162204	0.0106763	0.686213	0.983637	G	A
rs6884702	0.00149861	-0.0302211	0.0332183	0.926222	0	0.230559	0.991661	-0.0090076	-0.0506231	0.0326079	0.671398	0.983637	A	G
rs35895680	-0.00117178	-0.031161	0.0288175	0.938956	0	0.319108	0.998628	0.0192959	-0.0394445	0.0780362	0.519682	0.983637	C	A
rs243024	0.00125018	-0.0307718	0.0332721	0.939006	0	0.464302	0.998628	0.0513011	-0.00176188	0.104364	0.0581075	0.771116	G	A
rs465002	-0.00102741	-0.0287797	0.0267249	0.942157	0	0.364696	0.998628	0.00949077	-0.046157	0.0651385	0.738173	0.983637	C	T
rs9957145	0.000859968	-0.0226862	0.0244061	0.942934	0	0.222376	0.998628	0.00851022	-0.0224063	0.0394267	0.589536	0.983637	G	A
rs1641523	0.00100205	-0.0309962	0.0330004	0.951058	0	0.264339	0.998628	0.00379665	-0.0382452	0.0458385	0.85951	0.990972	C	T
rs2925979	0.000879899	-0.0287405	0.0305003	0.953572	0	0.624717	0.998628	-0.0289198	-0.0677617	0.00992205	0.144483	0.881105	T	C
rs73224262	-0.000148799	-0.0053581	0.0050605	0.955354	0.0191225	0.153311	0.998628	0.00155838	-0.00519285	0.00830961	0.650969	0.983637	C	T
rs12910825	-0.00165509	-0.061933	0.0586229	0.957082	0.734888	0.00602112	0.998628	-0.00119443	-0.0412408	0.0388519	0.953384	0.991801	A	G
rs11137820	-0.00188436	-0.0715047	0.067736	0.957693	0.788001	0.00212999	0.998628	0.0162993	-0.0868095	0.119408	0.756692	0.985223	C	G
rs75253922	0.000852608	-0.0335656	0.0352708	0.961276	0.429251	0.0612147	0.998628	0.00609103	-0.0445065	0.0566885	0.813476	0.985223	T	C
rs73226260	0.000257057	-0.010954	0.0114681	0.964155	0	0.245636	0.998628	-0.00071438	-0.018342	0.0169133	0.936691	0.991801	G	A
rs11257655	0.000524098	-0.0262325	0.0272807	0.969376	0	0.208363	0.998628	-0.00850792	-0.0435714	0.0265556	0.63438	0.983637	C	T
rs286925	0.000454242	-0.0245361	0.0254446	0.971581	0	0.616412	0.998628	0.0056501	-0.0271075	0.0384077	0.735319	0.983637	A	G
rs7756992	0.000450744	-0.0294178	0.0303193	0.976404	0	0.82176	0.998628	0.00492393	-0.0342388	0.0440867	0.805352	0.985223	A	G
rs149364428	-6.8378e-05	-0.00491586	0.0047791	0.977944	0	0.374271	0.998628	0.000484053	-0.00623512	0.00720323	0.887714	0.991801	G	A
rs12719778	-0.000428796	-0.0323855	0.0315279	0.979019	0	0.428415	0.998628	0.00422936	-0.0377211	0.0461798	0.843358	0.985223	T	C
rs362307	0.000216782	-0.0210685	0.0215021	0.984074	0.361287	0.0768025	0.998628	0.00128074	-0.0207879	0.0233493	0.90944	0.991801	C	T
rs1575972	-0.000114868	-0.0117595	0.0115297	0.984575	0.162231	0.122325	0.998628	0.00521829	-0.0167271	0.0271637	0.64118	0.983637	T	A
rs4976033	0.000321644	-0.0360111	0.0366544	0.986157	0.210837	0.111394	0.998628	-0.0055262	-0.0474952	0.0364429	0.796349	0.985223	A	G
rs474513	0.000279555	-0.0319506	0.0325097	0.986436	0	0.797152	0.998628	-0.00211828	-0.0443988	0.0401622	0.921777	0.991801	A	G
rs17250977	-9.36535e-05	-0.0115523	0.011365	0.987219	0.0575754	0.145179	0.998628	0.00655615	-0.00802276	0.0211351	0.378103	0.939379	A	G
rs6518681	-7.04921e-05	-0.0169163	0.0167753	0.993456	0	0.36711	0.998628	0.010576	-0.0116017	0.0327537	0.349964	0.939379	A	G
rs62370480	6.65357e-05	-0.0270807	0.0272138	0.996167	0	0.624975	0.998628	-0.0215599	-0.0571628	0.014043	0.235272	0.929148	G	A
rs114526150	1.43518e-05	-0.0092406	0.0092693	0.997575	0	0.451698	0.998628	0.00148748	-0.0106361	0.0136111	0.809963	0.985223	T	G
rs3774723	4.81652e-05	-0.0363455	0.0364419	0.99793	0.580009	0.0290946	0.998628	-0.00903838	-0.051554	0.0334772	0.676921	0.983637	G	A
rs10938398	2.7808e-05	-0.0316655	0.0317211	0.998628	0	0.361203	0.998628	-0.0258593	-0.0674328	0.0157143	0.222798	0.929148	G	A
